# Supplementary material for: Cancer Biomarker Discovery: The Entropic Hallmark
Source: PLoS One. 2010 Aug 18;5(8):e12262. doi: 10.1371/journal.pone.0012262 (PMC2923618; doi:10.1371/journal.pone.0012262)
Supplement: File S2 — Lapointe Data Supporting file (1.51 MB XLS) [file pone.0012262.s002.xls]

## Sheet: Results-Complexity
Lapointe Data
Correlation with f0					HHH = Normalized Shannon Entropy
					CMPR = MPR - Statistical Complexity
IKCOD = 0	===>	Control			CMAVEK0 = M-Normal
IKCOD = 1	===>	Tumor			CMAVEK2 = M-Metastasis
IKCOD = 2	===>	Metastasis
NGEN = 5153		NPAT = 112
ITOT	JJP	SAMPLE	IBKOD		HHH	CMPR	CMAVEK0	CMAVEK2
1	2	SHBW137_PN83	0		0.987015	0.0345071	0.0199241	0.0733234
2	3	SHCQ126_PN318	0		0.993707	0.01856	0.00972191	0.0688127
3	4	SHCQ112_PN233	0		0.987999	0.0335303	0.0143303	0.0791996
4	5	SHBW134_PN250	0		0.987312	0.0347359	0.0164511	0.0750074
5	6	SHCQ150_PN92	0		0.986104	0.039802	0.016935	0.0871081
6	7	SHBB151_PN21	0		0.979572	0.0501797	0.0195061	0.099121
7	8	SHCQ160_PN111	0		0.985484	0.0391292	0.0151189	0.0879748
8	9	SHBB146_PN14	0		0.979604	0.0539075	0.0241033	0.107271
9	10	SHBB125_PN57	0		0.989592	0.0303626	0.0131126	0.0781062
10	11	SHBW125_PN313	0		0.98429	0.0440205	0.0196044	0.0953266
11	12	SHBB120_PN55	0		0.988767	0.0329602	0.0118331	0.0852413
12	13	SHCQ136_PN195	0		0.983314	0.0476416	0.0184653	0.0997909
13	14	SHBB118_PN54	0		0.974402	0.0709917	0.0304105	0.122067
14	15	SHBW120_PN177	0		0.986453	0.0381769	0.0164	0.0828948
15	16	SHBW118_PN176	0		0.984167	0.0442955	0.0192588	0.0929297
16	17	SHBW116_PN174	0		0.986259	0.0399211	0.0166796	0.0931125
17	19	SHCQ163_PN224	0		0.986819	0.0373864	0.0163427	0.0889287
18	20	SHBW122_PN180	0		0.983231	0.0437293	0.0212939	0.0818484
19	21	SHBW107_PN181	0		0.988468	0.0320702	0.01646	0.0732455
20	22	SHCQ119_PN103	0		0.990509	0.0270472	0.0132229	0.0765304
21	23	SHCQ156_PN205	0		0.985837	0.0404092	0.0190093	0.0905411
22	24	SHCQ123_PN317	0		0.9898	0.0288468	0.0153798	0.0773121
23	25	SHBW129_PN153	0		0.988267	0.0327385	0.0197033	0.0739838
24	26	SHCQ131_PN190	0		0.986613	0.0362286	0.0194039	0.0821259
25	27	SHCQ129_PN187	0		0.986692	0.03749	0.0269179	0.0721752
26	28	SHCQ147_PN335	0		0.986787	0.0371745	0.0191879	0.0833239
27	29	SHBW136_PN265	0		0.979905	0.0531459	0.0316468	0.0892106
28	30	SHBW101_PN100	0		0.986087	0.0365704	0.0211286	0.0846262
29	31	SHBB122_PN56	0		0.989237	0.0298193	0.0189999	0.072778
30	32	SHBW141_PN87	0		0.992085	0.0237402	0.0141817	0.0753626
31	33	SHBW145_PN102	0		0.978581	0.0422082	0.0200362	0.091585
32	34	SHCQ120_PN316	0		0.960191	0.0612109	0.0316507	0.100885
33	35	SHBW104_PN308	0		0.984509	0.0334075	0.0174054	0.081155
34	36	SHCQ161_PN112	0		0.986426	0.0382549	0.0183026	0.0936465
35	37	SHBW098_PN37	0		0.984803	0.0422519	0.0277898	0.0873074
36	38	SHCQ113_PN229	0		0.985482	0.0424955	0.0297999	0.0927702
37	39	SHBB142_PN05	0		0.989526	0.0293755	0.0195434	0.077026
38	40	SHBB127_PN58	0		0.990654	0.0260157	0.0133246	0.0763016
39	41	SHBB150_PN19	0		0.986616	0.0376803	0.0183744	0.0944924
40	42	SHCQ134_PN191	0		0.990501	0.0280546	0.0207137	0.0764544
41	43	SHBW127_PN148	0		0.987721	0.0273105	0.0144148	0.0671754
42	1	SHBW128_PT153	1		0.98041	0.0552376	0.0343213	0.0810117
43	18	SHCQ157_PT110	1		0.980813	0.054573	0.0269255	0.100959
44	44	SHBW143_PT83	1		0.98797	0.0332528	0.0373149	0.0599473
45	45	SHCQ164_PT224	1		0.979839	0.0556886	0.0493422	0.0665518
46	46	SHCQ162_PT112	1		0.983571	0.0403672	0.0371804	0.071402
47	47	SHBB149_PT19	1		0.989633	0.0282779	0.0301064	0.0563187
48	48	SHBB158_PT138	1		0.983619	0.0475532	0.0453022	0.0580926
49	49	SHBW103_PT310	1		0.985741	0.0375231	0.0364711	0.0464286
50	52	SHBB130_PT126	1		0.980875	0.0555866	0.0517601	0.0488909
51	53	SHCQ155_PT205	1		0.970078	0.0854689	0.0837442	0.0537649
52	54	SHCQ137_PT28	1		0.953899	0.123881	0.107407	0.063412
53	58	SHBB129_PT130	1		0.985349	0.0423846	0.0573243	0.0349775
54	62	SHBW133_PT250	1		0.990997	0.0248528	0.0320862	0.0405701
55	63	SHBW121_PT177	1		0.980024	0.0505108	0.0532158	0.061936
56	64	SHCQ154_PT215	1		0.971903	0.0660401	0.0584928	0.0851276
57	65	SHBW124_PT313	1		0.992211	0.0219506	0.0326718	0.0482731
58	66	SHCQ149_PT92	1		0.979955	0.0522999	0.0494532	0.0787687
59	67	SHCQ100_PT233	1		0.974604	0.0681955	0.0645844	0.0756362
60	68	SHBB123_PT56	1		0.991075	0.024889	0.0273381	0.0606484
61	69	SHBW115_PT173	1		0.986408	0.0367555	0.0383121	0.0666888
62	70	SHBW097_PT37	1		0.987244	0.0350601	0.0353359	0.0682089
63	71	SHCQ132_PT190	1		0.979307	0.0512462	0.0484172	0.0688963
64	72	SHBB152_PT21	1		0.98041	0.048049	0.0323668	0.0903448
65	73	SHBW102_PT32	1		0.988504	0.0311435	0.0310522	0.0631303
66	74	SHBW135_PT265	1		0.97677	0.0619477	0.0643918	0.0665521
67	75	SHBB147_PT14	1		0.991284	0.0240787	0.0263349	0.0664362
68	76	SHBB145_PT07	1		0.992784	0.0208084	0.0273685	0.0631672
69	77	SHBB141_PT05	1		0.989754	0.0281239	0.0295345	0.0669109
70	78	SHBW142_PT96	1		0.985215	0.0419649	0.0467246	0.0683561
71	79	SHCQ121_PT316	1		0.973503	0.0499546	0.0448208	0.079624
72	80	SHCQ159_PT111	1		0.989761	0.0304656	0.0311215	0.0781729
73	81	SHBW139_PT87	1		0.988401	0.0320932	0.0421218	0.0508917
74	82	SHBW105_PT308	1		0.98192	0.041776	0.0433441	0.0692166
75	83	SHBB128_PT58	1		0.991221	0.0247734	0.0359045	0.0473972
76	84	SHCQ148_PT335	1		0.986899	0.0376037	0.0461011	0.0637862
77	85	SHCQ145_PT168	1		0.979741	0.0543121	0.0617764	0.0576882
78	86	SHBW119_PT176	1		0.975123	0.0650097	0.0698081	0.0564243
79	88	SHCQ124_PT317	1		0.991446	0.0252056	0.0383779	0.0454965
80	89	SHBB121_PT55	1		0.990244	0.0284583	0.0404188	0.0536916
81	90	SHCQ098_PT235	1		0.982575	0.0504187	0.0596876	0.0682723
82	91	SHBB126_PT57	1		0.990787	0.0267914	0.0359718	0.0540899
83	92	SHCQ115_PT314	1		0.989468	0.0299302	0.0357251	0.0609786
84	93	SHCQ127_PT319	1		0.988015	0.0325563	0.0396564	0.0579846
85	94	SHCQ118_PT103	1		0.984908	0.0404058	0.0483103	0.0596077
86	95	SHBW111_PT312	1		0.988003	0.0328636	0.0407036	0.0617603
87	96	SHBW106_PT311	1		0.983599	0.0450418	0.0507817	0.067443
88	97	SHCQ165_PT229	1		0.990269	0.0287557	0.0384076	0.0601474
89	98	SHBW109_PT181	1		0.985564	0.0383899	0.0481401	0.0473587
90	99	SHBW131_PT171	1		0.977128	0.0544711	0.0552628	0.0723996
91	100	SHCQ133_PT191	1		0.985493	0.0376821	0.0469186	0.0489398
92	101	SHBW117_PT174	1		0.985837	0.0360342	0.0424288	0.0595654
93	102	SHCQ117_PT315	1		0.988662	0.0313	0.0344806	0.065257
94	103	SHBW099_PT100	1		0.99025	0.0287801	0.0326559	0.0657888
95	104	SHBW110_PT309	1		0.983832	0.0452125	0.0517311	0.0506411
96	105	SHBW123_PT180	1		0.990362	0.0268469	0.0295796	0.0624269
97	106	SHCQ125_PT318	1		0.987862	0.0343457	0.0310155	0.0723721
98	107	SHBB119_PT54	1		0.987584	0.0314985	0.0323003	0.069826
99	108	SHCQ139_PT41	1		0.990417	0.0268831	0.0295006	0.0639915
100	109	SHCQ135_PT195	1		0.989399	0.0308275	0.0245258	0.0759992
101	110	SHBW126_PT148	1		0.992812	0.0196329	0.0217923	0.0518614
102	111	SHCQ128_PT187	1		0.986213	0.0384428	0.0403195	0.0565808
103	112	SHCQ122_PT102	1		0.981461	0.0289614	0.0258085	0.0622141
104	50	SHBW146_PL194	2		0.957545	0.11597	0.109761	0.0453134
105	51	SHBB156_PL133	2		0.975995	0.067304	0.0742071	0.0369344
106	55	SHBW147_PL118	2		0.9422	0.157397	0.142109	0.0574327
107	56	SHCQ151_PL114	2		0.939997	0.155722	0.13876	0.0519816
108	57	SHCQ153_PL116	2		0.949779	0.129359	0.11487	0.0414037
109	59	SHCQ152_PL115	2		0.913231	0.185901	0.14602	0.0795922
110	60	SHBB131_PL129	2		0.975697	0.0658911	0.0678433	0.0415904
111	61	SHBB154_PL122	2		0.965435	0.0924791	0.0908729	0.04963
112	87	SHBB153_PL27	2		0.973589	0.0710707	0.0789836	0.0527566

## Sheet: Results-correlation
Lapointe Data
Correlation with f0
IKCOD = 0	===>	Control
IKCOD = 1	===>	Tumor
IKCOD = 2	===>	Metastasis
NGEN = 5153		NPAT = 112
II	Gene	JSM-Pear	JSM-SPear	Ranking
5102	G_784285	-0.96673	-0.95	1.35538		107216 Homo sapiens mRNA; cDNA DKFZp564B222 (from clone DKFZp564B222) Hs.100261 AA447503
479	G_811015	-0.93797	-0.95	1.33502	FOS	111796 FOS v-fos FBJ murine osteosarcoma viral oncogene homolog Hs.25647 AA485377 2353
2620	G_76988	-0.94899	-0.9	1.30789		114501 Homo sapiens cDNA: FLJ22845 fis, clone KAIA5195 Hs.109087 T61050
4986	G_914588	-0.93124	-0.9	1.29507	KLK3	121351 KLK3 kallikrein 3, (prostate specific antigen) Hs.171995 AA569482 354
1854	G_767313	-0.92302	-0.9	1.28917		110201 Homo sapiens, clone IMAGE:5287010, mRNA Hs.288869 AA418510
747	G_768638	-0.84795	-0.96667	1.28587		100798 Homo sapiens cDNA FLJ33407 fis, clone BRACE2010535 Hs.118747 AA425352
2941	G_711918	0.9578	0.85	1.28058		114397 Homo sapiens OK/SW-cl.68 mRNA, complete cds Hs.374684 AA282134
1842	G_753291	-0.9424	-0.86667	1.28033		308284 C1orf21 chromosome 1 open reading frame 21 Hs.12532 AA406569 81563
1843	G_268837	-0.94116	-0.86667	1.27941		224141 C1orf21 chromosome 1 open reading frame 21 Hs.12532 N26008 81563
3232	G_745350	-0.94074	-0.86667	1.2791		317950 AA625658
4990	G_244796	-0.93969	-0.83333	1.25597		98519 Homo sapiens cDNA: FLJ23160 fis, clone LNG09682 Hs.118258 N52554
4388	G_1931136	0.93284	0.83333	1.25085		316371 ESTs, Moderately similar to hypothetical protein FLJ20378 [Homo sapiens] [H.sapiens] Hs.359796 AI333863
1857	G_51920	-0.90121	-0.86667	1.25032		225391 OSBPL1A oxysterol binding protein-like 1A Hs.252716 H22927 114876
1658	G_1474987	-0.89301	-0.85	1.23287		222502 ESTs Hs.380760 AA857364
990	G_52708	0.92745	0.80417	1.22754		120874 ESTs Hs.349081 H29050
3348	G_686172	0.84705	0.88333	1.22383		111873 KIAA0008 Drosophila discs large-1 tumor supressor-like Hs.77695 AA262211 9787
1334	G_51408	-0.864	-0.86667	1.22377		105279 DSCR1L1 Down syndrome critical region gene 1-like 1 Hs.156007 H19439 10231
3332	G_135454	0.89186	0.83333	1.2206		119045 FLJ12541 hypothetical protein FLJ12541 similar to Stra6 Hs.24553 R32753 64220
2841	G_753184	-0.85866	-0.86667	1.22001	SOX9	117427 SOX9 SRY (sex determining region Y)-box 9 (campomelic dysplasia, autosomal sex-reversal) Hs.2316 AA400464 6662
4691	G_141361	-0.85265	-0.86667	1.21578	LOC51334	110939 LOC51334 mesenchymal stem cell protein DSC54 Hs.157461 R63841 51334
1511	G_378399	-0.86734	-0.85	1.2144		225540 Homo sapiens cDNA FLJ31372 fis, clone NB9N42000281 Hs.89388 AA777178
545	G_837870	-0.88533	-0.81667	1.20447		105859 PRELP proline arginine-rich end leucine-rich repeat protein Hs.76494 AA434067 5549
774	G_1948377	-0.83602	-0.86667	1.20418		319946 EST, Highly similar to sigma receptor (SR31747 binding protein 1) [Homo sapiens] [H.sapiens] Hs.157285 AI365014
1841	G_293569	-0.93912	-0.75	1.20185		114578 C1orf21 chromosome 1 open reading frame 21 Hs.12532 N69286 81563
706	G_773236	-0.9074	-0.78333	1.19874		105951 FPR1 formyl peptide receptor 1 Hs.753 AA425249 2357
1389	G_810728	0.93091	0.75	1.19545		102510 ZD52F10 hypothetical gene ZD52F10 Hs.32343 AA457707 93099
1048	G_284383	-0.80509	-0.88333	1.19517		226747 SYNPO2 synaptopodin 2 Hs.31412 N52151 171024
1587	G_745011	-0.81808	-0.86667	1.19179		225963 KIAA1750 KIAA1750 protein Hs.173094 AA626024 85453
783	G_23804	-0.79186	-0.88333	1.1863		108443 ZFP36 zinc finger protein 36, C3H type, homolog (mouse) Hs.343586 R38383 7538
4942	G_838285	-0.83803	-0.83333	1.18183		109896 LOC51092 CGI-40 protein Hs.33724 AA457484 51092
3233	G_230196	-0.91336	-0.75	1.18183		108474 Homo sapiens cDNA: FLJ22586 fis, clone HSI02774 Hs.13179 H94845
2697	G_51185	-0.83694	-0.83333	1.18106		120709 Homo sapiens cDNA FLJ30555 fis, clone BRAWH2003818 Hs.125019 H17143
839	G_85450	0.88	0.78333	1.17814		101511 ACOX2 acyl-Coenzyme A oxidase 2, branched chain Hs.9795 T71713 8309
4531	G_136863	-0.78785	-0.86667	1.17125		317907 SYCP2 synaptonemal complex protein 2 Hs.202676 R36116 10388
2621	G_489850	-0.83883	-0.81667	1.17072		221757 Homo sapiens cDNA: FLJ22845 fis, clone KAIA5195 Hs.109087 AA099330
4282	G_435953	0.852	0.8	1.16872		105346 ITPR3 inositol 1,4,5-triphosphate receptor, type 3 Hs.77515 AA701976 3710
4823	G_328542	-0.83539	-0.81667	1.16826		314293 GALNT3 UDP-N-acetyl-alpha-D-galactosamine:polypeptide N-acetylgalactosaminyltransferase 3 (GalNAc-T3) Hs.278611 W40257 2591
1584	G_742569	-0.75589	-0.88333	1.1626		106459 FLJ00026 hypothetical protein FLJ00026 Hs.171118 AA400074 81704
4460	G_377728	-0.80919	-0.83333	1.16156		109663 ESTs Hs.91954 AA056224
1333	G_796263	-0.71141	-0.91667	1.16034		99648 PGCP plasma glutamate carboxypeptidase Hs.197335 AA460833 10404
2064	G_1552804	-0.76991	-0.86667	1.15926		313288 Homo sapiens cDNA FLJ37952 fis, clone CTONG2009258 Hs.380069 AA927761
573	G_210717	-0.76857	-0.86667	1.15837		105408 SDC2 syndecan 2 (heparan sulfate proteoglycan 1, cell surface-associated, fibroglycan) Hs.1501 H64346 6383
1575	G_2067500	-0.89551	-0.73333	1.15746		312808 LDB3 LIM domain binding 3 Hs.49998 AI383171 11155
3437	G_504308	0.8148	0.81667	1.15362		116712 FLJ10540 hypothetical protein FLJ10540 Hs.14559 AA131908 55165
754	G_108837	-0.77996	-0.85	1.15362	CCL2	109619 CCL2 chemokine (C-C motif) ligand 2 Hs.303649 T77816 MCP-1=MCAF=small inducible cytokine A2=JE=chemokine 6347
753	G_768561	-0.75837	-0.86667	1.15163		114904 CCL2 chemokine (C-C motif) ligand 2 Hs.303649 AA425102 MCP-1=MCAF=small inducible cytokine A2=JE=chemokine 6347
4680	G_284100	-0.92653	-0.68333	1.15126		113533 COLEC12 collectin sub-family member 12 Hs.29423 N53421 81035
5043	G_286450	-0.8734	-0.75	1.15123		114414 PHCA phytoceramidase, alkaline Hs.23862 N67336 55331
2493	G_429263	-0.77362	-0.85	1.14934		114635 SLC2A10 solute carrier family 2 (facilitated glucose transporter), member 10 Hs.305971 AA007343 81031
2658	G_361565	-0.91226	-0.68333	1.13981		113888 GLUD1 glutamate dehydrogenase 1 Hs.77508 AA017175 2746
4927	G_376435	-0.87915	-0.71667	1.13425		120174 ESTs, Weakly similar to hypothetical protein FLJ20489 [Homo sapiens] [H.sapiens] Hs.110406 AA039712
1531	G_759873	0.73171	0.86667	1.13425		112249 P37NB 37 kDa leucine-rich repeat (LRR) protein Hs.155545 AA423870 10234
1157	G_812048	-0.85078	-0.75	1.13416		118560 PRNP prion protein (p27-30) (Creutzfeld-Jakob disease, Gerstmann-Strausler-Scheinker syndrome, fatal familial insomnia) Hs.74621 AA455969 5621
2882	G_1474684	-0.83276	-0.76667	1.13193		113022 EFNA1 ephrin-A1 Hs.1624 AA857015 1942
3357	G_2309234	0.90096	0.68333	1.13078		313874 CTSL2 cathepsin L2 Hs.87417 AI652005 1515
341	G_1896737	-0.83119	-0.76667	1.13078		318794 EST Hs.150068 AI298114
1381	G_626841	0.85921	0.73333	1.12961		118174 MET met proto-oncogene (hepatocyte growth factor receptor) Hs.285754 AA190919 4233
2810	G_786657	-0.71865	-0.86667	1.12587		99524 EST Hs.99258 AA451886
3404	G_209066	0.79206	0.8	1.12577		163308 STK6 serine/threonine kinase 6 Hs.250822 H63492 aurora/IPL1-related kinase 6790
3485	G_825399	0.8057	0.78333	1.12373		117425 TRAF3 TNF receptor-associated factor 3 Hs.297660 AA504259 7187
1512	G_262028	-0.86495	-0.71667	1.12328		110313 Homo sapiens cDNA FLJ31372 fis, clone NB9N42000281 Hs.89388 H98802
3298	G_813481	-0.84825	-0.73333	1.12129		109819 HOXB13 homeo box B13 Hs.66731 AA455572 10481
645	G_840460	-0.72827	-0.85	1.11932		106455 IL7R interleukin 7 receptor Hs.362807 AA485865 IL-7 receptor alpha chain 3575
1670	G_564801	-0.87092	-0.7	1.11736		101321 Homo sapiens cDNA: FLJ21409 fis, clone COL03924 Hs.172129 AA129551
777	G_378488	-0.77749	-0.8	1.11557		118898 CYR61 cysteine-rich, angiogenic inducer, 61 Hs.8867 AA777187 3491
776	G_360254	-0.82574	-0.75	1.1155		308090 CYR61 cysteine-rich, angiogenic inducer, 61 Hs.8867 AA012892 3491
3401	G_811927	0.80998	0.76667	1.11528		119954 PTGS1 **prostaglandin-endoperoxide synthase 1 (prostaglandin G/H synthase and cyclooxygenase) Hs.88474 AA454668 5742
3418	G_128711	0.85287	0.71667	1.114		307638 ANLN anillin, actin binding protein (scraps homolog, Drosophila) Hs.62180 R12261 54443
1338	G_812975	-0.7745	-0.8	1.11349		117247 KIAA0172 KIAA0172 protein Hs.77546 AA464605 23189
3053	G_1584573	0.73774	0.83333	1.11297		114504 ESTs Hs.369529 AA971709
4820	G_811766	-0.87773	-0.68333	1.11236		102546 NEDD4L neural precursor cell expressed, developmentally down-regulated 4-like Hs.12017 AA443004 23327
4822	G_148225	-0.73518	-0.83333	1.11127		107949 GALNT3 UDP-N-acetyl-alpha-D-galactosamine:polypeptide N-acetylgalactosaminyltransferase 3 (GalNAc-T3) Hs.278611 H13688 2591
4819	G_279378	-0.87404	-0.68333	1.10945		104496 SYNGR3 synaptogyrin 3 Hs.6467 N46419 9143
3491	G_281898	0.78437	0.78333	1.10853		224983 DDA3 p53-regulated DDA3 Hs.77550 N48162 84722
4818	G_682477	-0.80034	-0.76667	1.1083		99678 ESTs Hs.220478 AA255551
2758	G_767823	-0.79812	-0.76667	1.1067		110566 PALMD palmdelphin Hs.14606 AA418728 54873
3403	G_129865	0.76364	0.8	1.10596		98982 STK6 serine/threonine kinase 6 Hs.250822 R11407 6790
4023	G_283375	0.86944	0.68333	1.10583		117187 CACNA1I calcium channel, voltage-dependent, alpha 1I subunit Hs.125116 N52765 8911
4982	G_1571873	-0.90564	-0.63333	1.10512		308723 RoXaN ubiquitous tetratricopeptide containing protein RoXaN Hs.25347 AA935554 23264
4673	G_416556	-0.88088	-0.66667	1.10472		105846 ESTs Hs.20573 W86987
4442	G_49937	0.91924	0.6125	1.10461		120744 SEZ6L seizure related 6 homolog (mouse)-like Hs.194766 H29013 23544
2793	G_447404	-0.82515	-0.73333	1.10392		221906 FLJ10569 hypothetical protein FLJ10569 Hs.5105 AA702327 55174
4983	G_1572723	-0.90171	-0.63333	1.1019		307615 Homo sapiens, Similar to RIKEN cDNA 1700010L19 gene, clone MGC:16214 IMAGE:3659061, mRNA, complete cds Hs.103441 AA969822
3406	G_770992	0.8766	0.66667	1.10131		108149 AA428252
4394	G_34204	0.87557	0.66667	1.10049		106554 TRIM9 tripartite motif-containing 9 Hs.75090 R24342 114088
844	G_1883065	0.87483	0.66667	1.0999		319128 NCAM1 neural cell adhesion molecule 1 Hs.167988 AI214500 4684
704	G_1584551	0.80154	0.75	1.09771		224898 SFTPB surfactant, pulmonary-associated protein B Hs.76305 AA972350 6439
3258	G_193736	0.81613	0.73333	1.0972	BRCA2	99552 BRCA2 breast cancer 2, early onset Hs.34012 H47777 BRCA2=Mutated in breast and ovarian cancer 675
1060	G_279905	-0.6705	-0.86667	1.09576		107482 TAHCCP1 trans-activated by hepatitis C virus core protein 1 Hs.118087 N38860 23111
416	G_770910	0.81096	0.73333	1.09336		119319 ELF3 E74-like factor 3 (ets domain transcription factor, epithelial-specific ) Hs.166096 AA433851 1999
942	G_143661	-0.82361	-0.71667	1.09176		102822 NTN4 netrin 4 Hs.102541 R76613 59277
1331	G_306743	-0.65841	-0.86667	1.0884		221875 TSG twisted gastrulation Hs.247302 N91767 57045
846	G_897262	0.86023	0.66667	1.08832		227094 LOC55885 neuronal specific transcription factor DAT1 Hs.301914 AA677643 55885
4350	G_2107532	0.84529	0.68333	1.08695		192337 ITGB7 integrin, beta 7 Hs.1741 AI380522 CD103 beta=Integrin beta 7 3695
1691	G_29965	-0.73407	-0.8	1.08575		307623 PDCD4 programmed cell death 4 (neoplastic transformation inhibitor) Hs.326248 R14700 27250
1194	G_841664	-0.67401	-0.85	1.0848		114580 CAV1 caveolin 1, caveolae protein, 22kDa Hs.74034 AA487560 857
2378	G_271472	-0.69304	-0.83333	1.08386		103697 ZFP26 C3HC4-like zinc finger protein Hs.44685 N35020 50862
1004	G_211758	0.83217	0.68333	1.07678		118589 Homo sapiens cDNA: FLJ22256 fis, clone HRC02860 Hs.288741 H71070
639	G_727988	-0.71849	-0.8	1.07528		309744 CDW52 CDW52 antigen (CAMPATH-1 antigen) Hs.276770 AA393138 1043
2827	G_810263	-0.80145	-0.71667	1.07515		115640 LOC85415 rhophilin-like protein Hs.335798 AA464018 85415
1825	G_137531	-0.84284	-0.66667	1.07463		118970 PTPRG protein tyrosine phosphatase, receptor type, G Hs.89627 R38343 R-PTP-gamma=receptor protein tyrosine phosphatase gamma 5793
638	G_2417330	-0.71717	-0.8	1.0744		330568 CDW52 CDW52 antigen (CAMPATH-1 antigen) Hs.276770 AI826477 1043
3356	G_418279	0.79892	0.71667	1.07326		98808 Homo sapiens mRNA; cDNA DKFZp686L1553 (from clone DKFZp686L1553) Hs.35962 W90323
5000	G_283919	-0.83844	-0.66667	1.07118		110559 H2AFL H2A histone family, member L Hs.28777 N50797 8334
4992	G_324342	-0.83595	-0.66667	1.06923		114293 ASAHL N-acylsphingosine amidohydrolase (acid ceramidase)-like Hs.264330 W47576 27163
4989	G_1609538	-0.89534	-0.58333	1.0686		307045 KIAA1324 KIAA1324 protein Hs.104696 AI000966 57535
1809	G_1572724	-0.76049	-0.75	1.0681		319006 FLJ10983 hypothetical protein FLJ10983 Hs.23363 AA969814 55276
5029	G_744050	-0.6846	-0.81667	1.06566		223647 PSCD3 pleckstrin homology, Sec7 and coiled/coil domains 3 Hs.7984 AA629264 9265
4882	G_757337	-0.8034	-0.7	1.06558		110776 CACNA1D calcium channel, voltage-dependent, L type, alpha 1D subunit Hs.23838 AA437099 776
3489	G_753193	0.84402	0.65	1.0653		111874 PDCD6 programmed cell death 6 Hs.80019 AA406353 10016
69	G_277042	0.70287	0.8	1.06491		104532 HSPC156 amisyn Hs.99291 N39572 29091
4856	G_1901155	-0.82912	-0.66667	1.0639		312744 ZBRK1 zinc-finger protein ZBRK1 Hs.130965 AI301516 59348
4885	G_811101	-0.86601	-0.61667	1.06313		221683 KIAA1494 KIAA1494 protein Hs.301804 AA485676 57630
1062	G_135800	-0.61363	-0.86667	1.06191		103112 TAHCCP1 trans-activated by hepatitis C virus core protein 1 Hs.118087 R33103 23111
68	G_788524	0.61086	0.86667	1.06031		98772 HSPC156 amisyn Hs.99291 AA452801 29091
2844	G_814135	-0.76509	-0.73333	1.05978		222480 Homo sapiens mRNA; cDNA DKFZp451E085 (from clone DKFZp451E085) Hs.294092 AA465398
319	G_1916700	0.83508	0.65	1.05823		307670 AI347629
1783	G_682528	-0.71135	-0.78333	1.05812		120274 SCA1 spinocerebellar ataxia 1 (olivopontocerebellar ataxia 1, autosomal dominant, ataxin 1) Hs.74520 AA256507 6310
4678	G_704697	-0.77761	-0.71667	1.05749		107304 HERC3 hect domain and RLD 3 Hs.35804 AA282253 8916
1715	G_293001	-0.69105	-0.8	1.05714		224462 DKFZP434E2318 hypothetical protein DKFZp434E2318 Hs.63841 N69116 84078
1049	G_281190	-0.72692	-0.76667	1.0565		220805 ESTs Hs.30627 N50976
1306	G_346117	-0.74401	-0.75	1.05643		117565 GBP2 guanylate binding protein 2, interferon-inducible Hs.171862 W72748 2634
2929	G_288896	0.84544	0.63333	1.05635		101119 KCNK1 potassium channel, subfamily K, member 1 Hs.79351 N62620 3775
3995	G_206795	0.57919	0.88333	1.05628		105700 ASGR2 asialoglycoprotein receptor 2 Hs.1259 R98050 433
1216	G_487794	-0.70762	-0.78333	1.05562		111432 Homo sapiens cDNA FLJ20767 fis, clone COL06986 Hs.24192 AA043349
4995	G_243784	-0.7901	-0.7	1.05558		104357 H2BFB H2B histone family, member B Hs.180779 N33927 3017
4327	G_756931	0.72549	0.76667	1.05552		103095 S100A1 S100 calcium binding protein A1 Hs.292707 AA425934 S100 calcium binding protein A1 6271
4987	G_916250	-0.90055	-0.55	1.05522		115012 KLK3 kallikrein 3, (prostate specific antigen) Hs.171995 AA588358 354
3420	G_511096	0.64323	0.83333	1.0527		99680 Homo sapiens, Similar to RIKEN cDNA 2010317E24 gene, clone IMAGE:3502019, mRNA, partial cds Hs.19322 AA088457
1059	G_137275	-0.66386	-0.81667	1.05245		107421 PPI5PIV phosphatidylinositol (4,5) bisphosphate 5-phosphatase homolog; phosphatidylinositol polyphosphate 5-phosphatase type IV Hs.25156 R36586 56623
660	G_590264	-0.7009	-0.78333	1.05113		109102 MGP matrix Gla protein Hs.365706 AA155913 4256
3286	G_1579647	-0.78367	-0.7	1.05078		225143 HEYL hairy/enhancer-of-split related with YRPW motif-like Hs.23823 AA969508 26508
1386	G_454930	0.88365	0.56667	1.04974		221794 NAV2 neuron navigator 2 Hs.23467 AA779334 89797
4512	G_768168	-0.78139	-0.7	1.04908		109137 BMP6 bone morphogenetic protein 6 Hs.285671 AA424833 654
312	G_325822	0.73301	0.75	1.04872		102349 TGFA transforming growth factor, alpha Hs.170009 AA037107 Transforming growth factor, alpha 7039
841	G_153541	0.8894	0.55	1.04572		99694 **Homo sapiens cDNA FLJ37986 fis, clone CTONG2011188, highly similar to EPHRIN TYPE-B RECEPTOR 1 PRECURSOR (EC 2.7.1.112) Hs.355916 AI732309
1096	G_703581	-0.63159	-0.83333	1.04563		100039 PRG1 proteoglycan 1, secretory granule Hs.1908 AA278759 5552
3990	G_1947606	0.85359	0.6	1.04337		308996 TLR1 toll-like receptor 1 Hs.2474 AI339155 7096
1838	G_43933	-0.74155	-0.73333	1.04291		308154 MAOA monoamine oxidase A Hs.183109 H05775 4128
720	G_135791	0.72388	0.75	1.04235		106504 FN14 type I transmembrane protein Fn14 Hs.10086 R33355 51330
3496	G_951142	0.70503	0.76667	1.04156		100781 FEN1 flap structure-specific endonuclease 1 Hs.4756 AA620553 2237
4677	G_682555	-0.80025	-0.66667	1.04156		114792 IGF1R insulin-like growth factor 1 receptor Hs.239176 AA256419 3480
999	G_153023	-0.79972	-0.66667	1.04115		105005 Homo sapiens mRNA; cDNA DKFZp586M1418 (from clone DKFZp586M1418) Hs.272251 AI732261
3395	G_2457449	0.8254	0.63333	1.04038		330790 CCNB2 cyclin B2 Hs.194698 AI932735 9133
781	G_840944	-0.68448	-0.78333	1.04025		111323 EGR1 early growth response 1 Hs.326035 AA486533 1958
4788	G_502287	-0.86064	-0.58333	1.0397		106873 ESTs, Weakly similar to A46506 leukocyte activation antigen M6 - human [H.sapiens] Hs.356113 AA156781
5093	G_839545	-0.62119	-0.83333	1.03938		108204 ESTs Hs.368814 AA489791
3309	G_950916	0.75216	0.71667	1.03892		103531 **Homo sapiens mRNA; cDNA DKFZp434P055 (from clone DKFZp434P055) Hs.130741 AA608725
1317	G_1592976	-0.73565	-0.73333	1.03873		308207 MITF microphthalmia-associated transcription factor Hs.166017 AI002457 4286
3422	G_276915	0.75131	0.71667	1.03831		221973 DNMT3B DNA (cytosine-5-)-methyltransferase 3 beta Hs.251673 N39452 1789
4459	G_770944	-0.7161	-0.75	1.03697		222245 KIAA0453 KIAA0453 protein Hs.194737 AA433871 25783
1855	G_415550	-0.83257	-0.61667	1.03608		225595 Homo sapiens cDNA FLJ13598 fis, clone PLACE1009921 Hs.60257 W78714
596	G_767721	-0.65601	-0.8	1.03458		108053 Homo sapiens cDNA FLJ13604 fis, clone PLACE1010401 Hs.23193 AA417982
309	G_121136	0.74458	0.71667	1.03345		115832 C8orf13 reserved Hs.35453 T96924 83648
2830	G_1759290	-0.80332	-0.65	1.03336		318902 ChGn chondroitin beta1,4 N-acetylgalactosaminyltransferase Hs.11260 AI219094 55790
3991	G_428103	0.69196	0.76667	1.03276		112599 CD1C CD1C antigen, c polypeptide Hs.1311 AA002086 CD1C 911
1182	G_133273	-0.53398	-0.88333	1.03219		107552 PMP22 peripheral myelin protein 22 Hs.103724 R26732 5376
3412	G_130824	0.72471	0.73333	1.03101		101345 ESTs, Moderately similar to S-phase kinase-associated protein 2 , isoform 2; cyclin A/CDK2-associated p45; F-box protein Skp2 [Homo sapiens] [H.sapiens] Hs.356392 R22188
1625	G_773330	-0.64909	-0.8	1.0302		120562 GPNMB glycoprotein (transmembrane) nmb Hs.82226 AA425450 10457
4674	G_1467831	-0.85999	-0.56667	1.0299		223912 Homo sapiens cDNA FLJ34654 fis, clone KIDNE2018294 Hs.47023 AA883431
4928	G_767449	-0.75528	-0.7	1.02978		108523 KCNN2 potassium intermediate/small conductance calcium-activated channel, subfamily N, member 2 Hs.98280 AA418000 3781
4386	G_47510	0.83685	0.6	1.02972		120222 AP3B2 adaptor-related protein complex 3, beta 2 subunit Hs.21022 H11603 8120
407	G_810454	-0.83624	-0.6	1.02922		120566 BACE2 beta-site APP-cleaving enzyme 2 Hs.271411 AA457119 25825
5063	G_279085	0.73793	0.71667	1.02867		104290 MYO9B myosin IXB Hs.159629 N51705 myosin-IXb 4650
3436	G_564803	0.70386	0.75	1.02855	FOXM1	113261 FOXM1 forkhead box M1 Hs.239 AA129552 MPP2=putative M phase phosphoprotein 2 2305
463	G_269733	-0.83426	-0.6	1.02761		226160 ESTs Hs.42189 N24805
3923	G_504201	0.71925	0.73333	1.02718		317667 LOC90378 hypothetical protein BC007384 Hs.140309 AA132083 90378
5010	G_130004	-0.68339	-0.76667	1.02704		119009 ESTs Hs.25933 R11605
2704	G_79032	-0.73286	-0.71667	1.02504		120973 ARSDR1 androgen-regulated short-chain dehydrogenase/reductase 1 Hs.179817 T61899 51109
3451	G_951241	0.69761	0.75	1.02428		114041 ANKT nucleolar protein ANKT Hs.279905 AA620485 51203
5001	G_789091	-0.79042	-0.65	1.02336		104837 H2AFL H2A histone family, member L Hs.28777 AA452933 8334
181	G_795771	-0.67686	-0.76667	1.0227		119606 LOC96626 pinch-2 Hs.285130 AA460330 96626
2077	G_240752	-0.80282	-0.63333	1.02256		223963 STX12 syntaxin 12 Hs.106823 H91046 23673
1845	G_810970	-0.85115	-0.56667	1.02253		114930 FLJ10716 CLLL7 protein Hs.24129 AA459405 55213
4520	G_165818	-0.71125	-0.73333	1.02159		119660 MGC39325 hypothetical protein MGC39325 Hs.34054 R86669 90362
595	G_489218	-0.63533	-0.8	1.02159		117386 SLC11A3 solute carrier family 11 (proton-coupled divalent metal ion transporters), member 3 Hs.5944 AA056733 30061
2063	G_795375	-0.72731	-0.71667	1.02108		109315 ITM2B integral membrane protein 2B Hs.239625 AA453275 9445
3170	G_488246	-0.82538	-0.6	1.02042		100004 KIAA1913 KIAA1913 protein Hs.172870 AA088177 114801
5052	G_745802	-0.70936	-0.73333	1.02028		105345 ESTs Hs.191602 AA420602
1874	G_815096	-0.65354	-0.78333	1.02016		220195 UBE2D3 ubiquitin-conjugating enzyme E2D 3 (UBC4/5 homolog, yeast) Hs.118797 AA465196 7323
3484	G_1744942	0.6914	0.75	1.02007		317952 Homo sapiens cDNA FLJ12198 fis, clone MAMMA1000876 Hs.112165 AI203953
3479	G_773147	0.70867	0.73333	1.0198		111977 FLJ10156 hypothetical protein FLJ10156 Hs.86211 AA425404 54478
3433	G_2062329	0.77142	0.66667	1.01958		308729 TTK TTK protein kinase Hs.169840 AI337292 7272
464	G_50265	-0.7557	-0.68333	1.01883		120658 ESTs Hs.23079 H17462
579	G_141845	-0.78424	-0.65	1.01859		109316 **Homo sapiens cDNA FLJ12540 fis, clone NT2RM4000425 Hs.48617 R70508
1274	G_1371759	-0.65042	-0.78333	1.01816		99304 CUGBP2 CUG triplet repeat, RNA binding protein 2 Hs.211610 AA856739 10659
4380	G_491311	0.72315	0.71667	1.01812		113194 EGLN3 egl nine homolog 3 (C. elegans) Hs.18878 AA148573 112399
3495	G_145503	0.75427	0.68333	1.01777	CDKN2D	113086 CDKN2D cyclin-dependent kinase inhibitor 2D (p19, inhibits CDK4) Hs.29656 R77517 p19-INK4D=Cyclin-dependent kinase 4 inhibitor D 1032
242	G_124148	-0.80891	-0.61667	1.01716		223699 ESTs Hs.19238 R01738
655	G_878182	-0.60633	-0.81667	1.01715		113214 A2M alpha-2-macroglobulin Hs.74561 AA775447 2
4378	G_1662163	0.78206	0.65	1.01692		310317 EST Hs.308070 AI083527
3447	G_366971	0.75227	0.68333	1.01629		112387 TOP2A topoisomerase (DNA) II alpha 170kDa Hs.156346 AA026682 7153
1296	G_666061	-0.8545	-0.55	1.0162		102761 EDG2 endothelial differentiation, lysophosphatidic acid G-protein-coupled receptor, 2 Hs.75794 AA193405 1902
1217	G_134422	-0.71889	-0.71667	1.0151		100341 Homo sapiens cDNA FLJ20767 fis, clone COL06986 Hs.24192 R31679
2556	G_52021	-0.7796	-0.65	1.01503		114369 DACH dachshund homolog (Drosophila) Hs.63931 H22566 1602
3987	G_1576709	0.75001	0.68333	1.01462		221059 RNASE2 ribonuclease, RNase A family, 2 (liver, eosinophil-derived neurotoxin) Hs.728 AA984940 6036
658	G_251685	-0.62357	-0.8	1.01432		98823 CDH11 cadherin 11, type 2, OB-cadherin (osteoblast) Hs.75929 H96738 1009
4557	G_854678	-0.62232	-0.8	1.01355		225740 LBH likely ortholog of mouse limb-bud and heart gene Hs.57209 AA630084 81606
739	G_205185	-0.59968	-0.81667	1.0132		98591 THBD thrombomodulin Hs.2030 H59861 7056
1844	G_258649	-0.85007	-0.55	1.01248		222126 ESTs Hs.124058 N32226
5108	G_141548	-0.85176	-0.54583	1.01164		226374 DKFZP566B0846 nectin 3 Hs.21201 R73088 25945
4725	G_461098	-0.65948	-0.76667	1.01128		223060 KIAA0447 KIAA0447 gene product Hs.214646 AA701168 9906
325	G_143169	0.67816	0.75	1.01114		114205 Homo sapiens, clone IMAGE:3881549, mRNA Hs.346735 R73672
2747	G_753162	-0.80001	-0.61667	1.0101		115002 TBC1D4 TBC1 domain family, member 4 Hs.173802 AA400457 9882
2657	G_701112	-0.84627	-0.55	1.00929		115238 XPC xeroderma pigmentosum, complementation group C Hs.320 AA287323 XP-C repair complementing protein (p125) 7508
4985	G_1010100	-0.79848	-0.61667	1.00889		100595 AA229499
3971	G_587011	-0.67469	-0.75	1.00881		98581 **Homo sapiens cDNA FLJ32605 fis, clone STOMA1000175 Hs.351292 AA133692
4937	G_788655	-0.83394	-0.56667	1.00825		120451 HTPAP HTPAP protein Hs.169341 AA449837 84513
5064	G_510856	0.74019	0.68333	1.00738		106244 ENC1 ectodermal-neural cortex (with BTB-like domain) Hs.104925 AA100036 Pig10=p53-inducible gene=Similar to actin-binding protein EN 8507
4787	G_1877234	-0.87173	-0.50417	1.00703		316392 ESTs, Weakly similar to A46506 leukocyte activation antigen M6 - human [H.sapiens] Hs.356113 AI276270
4353	G_1623158	0.80756	0.6	1.00606		309876 ESTs, Moderately similar to hypothetical protein FLJ20378 [Homo sapiens] [H.sapiens] Hs.269755 AA992626
1394	G_1567985	0.83094	0.56667	1.00577		116127 ESTs Hs.178762 AA975922
885	G_49665	-0.65099	-0.76667	1.00577		113651 EDNRB endothelin receptor type B Hs.82002 H28710 1910
4024	G_45601	0.81877	0.58333	1.00531		120758 ESTs Hs.124278 H08206
746	G_809533	-0.72148	-0.7	1.00525		116229 MGC14376 hypothetical protein MGC14376 Hs.29206 AA454584 84981
1853	G_301082	-0.70442	-0.71667	1.0049		104668 CTSO cathepsin O Hs.75262 N81036 1519
3055	G_145513	-0.82888	-0.56667	1.00407		104783 Homo sapiens chromosomal protein mRNA, complete cds Hs.1010 R77718
847	G_2328456	0.86092	0.51667	1.00406		316202 KIAA0408 KIAA0408 gene product Hs.118744 AI674081 9729
5072	G_327299	-0.58408	-0.81667	1.00404		108776 ESTs Hs.55238 AA284270
1360	G_271748	-0.64779	-0.76667	1.0037		100505 RBMS1 RNA binding motif, single stranded interacting protein 1 Hs.241567 N31587 5937
3486	G_741841	0.77714	0.63333	1.00252		110162 DDX11 DEAD/H (Asp-Glu-Ala-Asp/His) box polypeptide 11 (CHL1-like helicase homolog, S. cerevisiae) Hs.380623 AA402879 1663
1185	G_126341	-0.60341	-0.8	1.00205		102457 Homo sapiens cDNA: FLJ22300 fis, clone HRC04759 Hs.380437 R06438
1595	G_713145	-0.66393	-0.75	1.00165		109742 CD44 CD44 antigen (homing function and Indian blood group system) Hs.169610 AA282906 CD44=Pgp-1=extracellular matrix receptor-III=Hyaluronate rec 960
4029	G_2017652	0.60273	0.8	1.00164		312553 PPIL2 peptidylprolyl isomerase (cyclophilin)-like 2 Hs.93523 AI369818 23759
3123	G_855258	-0.57965	-0.81667	1.00147		308099 HLA-DRB1 major histocompatibility complex, class II, DR beta 1 Hs.375570 AA630549 3123
3700	G_753021	0.64365	0.76667	1.00103		113887 NOSIP eNOS interacting protein Hs.7236 AA436549 51070
4410	G_47255	0.81347	0.58333	1.001		120662 ESTs Hs.28051 H10999
3922	G_143756	0.71537	0.7	1.00088		109487 LOC90378 hypothetical protein BC007384 Hs.140309 R76498 90378
5128	G_970484	-0.81322	-0.58333	1.0008		310662 GABRA1 gamma-aminobutyric acid (GABA) A receptor, alpha 1 Hs.45740 AA776176 2554
4447	G_246808	0.71271	0.7	0.998977		115218 NALP2 NALP2 protein Hs.6844 N53214 55655
5039	G_795809	-0.57501	-0.81667	0.998792		105847 UBE2E3 ubiquitin-conjugating enzyme E2E 3 (UBC4/5 homolog, yeast) Hs.4890 AA459868 10477
2961	G_841507	0.75814	0.65	0.998637		103258 SFTPA2 surfactant, pulmonary-associated protein A2 Hs.177582 AA487267 6436
4570	G_194185	0.86356	0.5	0.997866		309274 ESTs Hs.181731 H51696
1227	G_626001	-0.77103	-0.63333	0.997795		103978 TAZ transcriptional co-activator with PDZ-binding motif (TAZ) Hs.24341 AA187933 25937
4443	G_205152	0.75563	0.65	0.996733		102832 FLJ11016 **hypothetical protein FLJ11016 Hs.210859 H59837 55285
4790	1360920	-0.6747	-0.73333	0.99649		121256 ZNF217 zinc finger protein 217 Hs.155040 AA782528 7764
4672	G_179212	-0.74063	-0.66667	0.996485		225716 KIAA1001 **KIAA1001 protein Hs.279937 H50220 22901
415	G_162479	0.85121	0.51667	0.995744		103746 ELF3 E74-like factor 3 (ets domain transcription factor, epithelial-specific ) Hs.166096 H27938 ELF-3=ESE-1=ESX=epithelial-specific transcription factor=epi 1999
2655	G_450327	-0.87916	-0.46667	0.995341		227103 ESTs Hs.188613 AA703619
490	G_1584628	-0.59086	-0.8	0.994543		226683 ALP alpha-actinin-2-associated LIM protein Hs.135281 AA972352 27295
778	G_1607286	-0.70442	-0.7	0.99308		309270 CYR61 cysteine-rich, angiogenic inducer, 61 Hs.8867 AI014487 3491
201	G_768020	0.68718	0.71667	0.992891		224344 Homo sapiens mRNA; cDNA DKFZp686H157 (from clone DKFZp686H157) Hs.90424 AA418748
2656	G_112785	-0.86643	-0.48333	0.992123		221513 GLUD1 glutamate dehydrogenase 1 Hs.77508 T85958 2746
4476	G_1540534	0.71928	0.68333	0.992121		318232 POLK polymerase (DNA directed) kappa Hs.135756 AA907554 51426
3381	G_308478	0.6486	0.75	0.991555		118061 Homo sapiens mRNA; cDNA DKFZp434D0818 (from clone DKFZp434D0818) Hs.5855 N95578
1093	G_586971	-0.71848	-0.68333	0.991541		223811 CTSB cathepsin B Hs.297939 AA130998 1508
661	G_549221	-0.62859	-0.76667	0.991417		98364 MGP matrix Gla protein Hs.365706 AA081092 4256
1001	G_746080	-0.71827	-0.68333	0.991389		162409 KLHL5 kelch-like 5 (Drosophila) Hs.272239 AA417595 Unknown UG Hs.62684 ESTs 51088
2667	G_140131	-0.76251	-0.63333	0.991226		110207 ACADL acyl-Coenzyme A dehydrogenase, long chain Hs.1209 R66005 33
440	G_2326216	0.80127	0.58333	0.991114		319785 PADI2 peptidyl arginine deiminase, type II Hs.33455 AI688230 11240
2523	G_82734	-0.78693	-0.6	0.989575		116294 FACL2 fatty-acid-Coenzyme A ligase, long-chain 2 Hs.154890 T73556 2180
5012	G_813149	-0.71462	-0.68333	0.988748		113226 H2BFQ H2B histone family, member Q Hs.2178 AA456298 8349
2448	G_234036	-0.58102	-0.8	0.988729		118410 FBXL5 F-box and leucine-rich repeat protein 5 Hs.5548 H68988 26234
3468	G_1591599	0.78454	0.6	0.987676		226380 LMNB1 lamin B1 Hs.89497 AA983462 4001
4711	G_284701	-0.86807	-0.46667	0.985559		112189 FOLH1 folate hydrolase (prostate-specific membrane antigen) 1 Hs.1915 N64840 2346
4817	G_768179	-0.8047	-0.56667	0.984204		226489 ESTs, Weakly similar to hypothetical protein FLJ20489 [Homo sapiens] [H.sapiens] Hs.3731 AA424849
3421	G_1055762	0.82639	0.53333	0.983545		224823 HELLS helicase, lymphoid-specific Hs.203963 AA628231 3070
384	G_741497	-0.81529	-0.55	0.983462		106668 LCN2 lipocalin 2 (oncogene 24p3) Hs.204238 AA400973 3934
2401	G_264938	-0.6344	-0.75	0.982325		104032 Homo sapiens cDNA FLJ13545 fis, clone PLACE1006867 Hs.10299 N21237
3458	G_301388	0.72124	0.66667	0.982159		105421 **ESTs, Weakly similar to T16418 hypothetical protein F52C9.7 - Caenorhabditis elegans [C.elegans] Hs.94542 AI734240
4594	G_462778	-0.79008	-0.58333	0.98209		220527 ESTs, Moderately similar to mucosa associated lymphoid tissue lymphoma translocation gene 1; MALT associated translocation [Homo sapiens] [H.sapiens] Hs.344553 AA706088
4351	G_204541	0.72067	0.66667	0.98174		112536 ASGR1 asialoglycoprotein receptor 1 Hs.12056 H58255 432
459	G_190732	-0.68734	-0.7	0.981038		119821 SLC2A5 solute carrier family 2 (facilitated glucose/fructose transporter), member 5 Hs.33084 H38650 6518
4553	G_786239	-0.56514	-0.8	0.979481		104281 ESTs, Weakly similar to L1 repeat, Tf subfamily, member 18 [Mus musculus] [M.musculus] Hs.5967 AA478452
1000	G_271109	-0.71685	-0.66667	0.97894		310051 SLC25A5 solute carrier family 25 (mitochondrial carrier; adenine nucleotide translocator), member 5 Hs.79172 N34464 292
4994	G_1500000	-0.71676	-0.66667	0.978874		223681 H2BFB H2B histone family, member B Hs.180779 AA885642 3017
751	G_1606557	-0.51324	-0.83333	0.9787		222391 FHL2 four and a half LIM domains 2 Hs.8302 AA995282 2274
75	G_49435	0.75904	0.61667	0.977969		111980 ESTs Hs.107510 H15395
3457	G_2018976	0.64585	0.73333	0.977187		311002 PTTG1 pituitary tumor-transforming 1 Hs.252587 AI362866 9232
4886	G_1573665	-0.81849	-0.53333	0.976917		310191 KIAA1494 KIAA1494 protein Hs.301804 AA954262 57630
1571	G_397488	-0.85778	-0.46667	0.976508		226783 TBX3 T-box 3 (ulnar mammary syndrome) Hs.267182 AA701075 6926
67	G_49227	0.6808	0.7	0.976467		117256 HSPC156 amisyn Hs.99291 H15408 29091
4862	G_196345	-0.71264	-0.66667	0.975861		112103 LIM LIM protein (similar to rat protein kinase C-binding enigma) Hs.154103 R92455 10611
2605	G_144852	-0.50692	-0.83333	0.975401		105904 PCL1 prenylcysteine lyase Hs.278627 R78485 51449
2593	G_131452	-0.6784	-0.7	0.974796		117937 KIAA1102 KIAA1102 protein Hs.202949 R23270 22998
4935	G_884662	-0.75427	-0.61667	0.974272		221566 ESTs Hs.293616 AA629903
1061	G_1573305	-0.57882	-0.78333	0.973981		227062 TAHCCP1 trans-activated by hepatitis C virus core protein 1 Hs.118087 AA953973 23111
1713	G_416061	-0.69354	-0.68333	0.973621		221773 GAB1 GRB2-associated binding protein 1 Hs.239706 W85766 2549
894	G_2456870	-0.76545	-0.6	0.972581		330281 LPP LIM domain containing preferred translocation partner in lipoma Hs.180398 AI925455 4026
3988	1292432	0.55168	0.8	0.971777		109026 MAD1L1 MAD1 mitotic arrest deficient-like 1 (yeast) Hs.7345 AA718910 8379
3330	G_786067	0.73596	0.63333	0.97095		109366 CDC25B cell division cycle 25B Hs.153752 AA448659 cdc25B=M-phase inducer phosphatase 2 994
1383	G_753791	0.88451	0.4	0.970751		98885 SNCAIP synuclein, alpha interacting protein (synphilin) Hs.24948 AA406113 9627
1388	G_2017535	0.86714	0.43333	0.969385		311064 LRP4 low density lipoprotein receptor-related protein 4 Hs.4930 AI369722 4038
1539	G_1946517	0.71908	0.65	0.969317		310139 KIAA0555 KIAA0555 gene product Hs.43107 AI352492 9832
4161	G_2109664	0.57054	0.78333	0.969083		318357 DNMT3A DNA (cytosine-5-)-methyltransferase 3 alpha Hs.241565 AI392759 1788
4775	G_51749	-0.74678	-0.61667	0.968485		106115 GUCY1A3 guanylate cyclase 1, soluble, alpha 3 Hs.75295 H23049 2982
1273	G_782730	0.61227	0.75	0.968181		105870 ALDH1A2 aldehyde dehydrogenase 1 family, member A2 Hs.95197 AA447978 8854
125	G_741429	-0.66728	-0.7	0.96709		120453 MAPK4 mitogen-activated protein kinase 4 Hs.269222 AA400982 63 kDa protein kinase related to rat ERK3 5596
3414	G_770424	0.71606	0.65	0.967079		102987 FANCG Fanconi anemia, complementation group G Hs.8047 AA427484 2189
1680	G_842863	-0.74431	-0.61667	0.966581		106519 NDRG1 N-myc downstream regulated gene 1 Hs.75789 AA486403 10397
4771	G_417018	-0.81653	-0.51667	0.966266		103127 CD14 CD14 antigen Hs.75627 W87269 929
4861	G_148550	-0.75676	-0.6	0.965757		310841 LIM LIM protein (similar to rat protein kinase C-binding enigma) Hs.154103 H12466 10611
868	G_208718	-0.72859	-0.63333	0.965376		99254 ANXA1 annexin A1 Hs.78225 H63077 301
3328	G_132848	0.81488	0.51667	0.964872		102187 ESTs, Weakly similar to hypothetical protein FLJ20294 [Homo sapiens] [H.sapiens] Hs.23917 R25641
1419	G_501854	0.53886	0.8	0.964557		117912 ESTs Hs.367688 AA127909
1242	G_813628	-0.64935	-0.7125	0.964008		105176 Homo sapiens cDNA FLJ37324 fis, clone BRAMY2018279 Hs.12714 AA447729
1657	G_252382	-0.67981	-0.68333	0.963889		103040 TM4SF6 transmembrane 4 superfamily member 6 Hs.121068 H87106 7105
867	G_753610	-0.58391	-0.76667	0.963708		117656 APOE apolipoprotein E Hs.169401 AA478589 348
1343	G_26418	-0.51119	-0.81667	0.963465		105908 EDG1 endothelial differentiation, sphingolipid G-protein-coupled receptor, 1 Hs.154210 R13546 1901
1356	G_272507	-0.72604	-0.63333	0.963453		222077 ME1 malic enzyme 1, NADP(+)-dependent, cytosolic Hs.14732 N35825 4199
4692	G_741769	-0.67848	-0.68333	0.962951		108897 POLB polymerase (DNA directed), beta Hs.180107 AA402838 5423
1807	G_502436	-0.73883	-0.61667	0.962368		224421 IRS2 insulin receptor substrate 2 Hs.143648 AA134861 8660
2649	G_810213	-0.82187	-0.5	0.962014		118034 IL1R1 interleukin 1 receptor, type I Hs.82112 AA464525 IL-1 receptor type I 3554
3011	G_1913366	0.8217	0.5	0.961868		307826 PRSS3 protease, serine, 3 (mesotrypsin) Hs.58247 AI308916 5646
260	G_744913	0.82354	0.49583	0.961283		226329 Homo sapiens cDNA FLJ23874 fis, clone LNG12957 Hs.234058 AA625804
2829	G_1590314	-0.75018	-0.6	0.960609		107097 ChGn chondroitin beta1,4 N-acetylgalactosaminyltransferase Hs.11260 AA977843 55790
1592	G_47186	-0.63897	-0.71667	0.960155		120854 Homo sapiens mRNA; cDNA DKFZp564P116 (from clone DKFZp564P116) Hs.323079 H10403
749	G_338736	-0.59884	-0.75	0.959744		161366 SERPINB1 serine (or cysteine) proteinase inhibitor, clade B (ovalbumin), member 1 Hs.183583 W52888 Mononcyte/neutrophil elastase inhibitor 1992
4821	G_842848	-0.77372	-0.56667	0.95904		105135 NEDD4L **neural precursor cell expressed, developmentally down-regulated 4-like Hs.12017 AA486281 23327
597	G_767706	-0.61723	-0.73333	0.958512		100791 SLC11A3 **solute carrier family 11 (proton-coupled divalent metal ion transporters), member 3 Hs.5944 AA417956 30061
2843	G_126934	-0.80725	-0.51667	0.958436		309524 Homo sapiens mRNA; cDNA DKFZp451E085 (from clone DKFZp451E085) Hs.294092 R07826
2757	G_506250	-0.78481	-0.55	0.958346		225264 PALMD palmdelphin Hs.14606 AA706132 54873
3428	G_2019372	0.65287	0.7	0.957204		309368 GTSE1 G-2 and S-phase expressed 1 Hs.122552 AI369284 51512
744	G_292528	-0.59407	-0.75	0.956775		115718 FLJ23306 hypothetical protein FLJ23306 Hs.5890 N62648 79579
1055	G_1492230	-0.77022	-0.56667	0.956218		98863 EFEMP1 EGF-containing fibulin-like extracellular matrix protein 1 Hs.76224 AA875933 2202
3397	G_287749	0.85806	0.41667	0.953877		114830 CDC7L1 CDC7 cell division cycle 7-like 1 (S. cerevisiae) Hs.28853 N62245 Cdc7-related kinase 8317
860	G_455227	0.81057	0.5	0.952378		222856 PLCL2 phospholipase C-like 2 Hs.54886 AA677432 23228
718	G_898092	-0.6632	-0.68333	0.952247		109224 CTGF connective tissue growth factor Hs.75511 AA598794 1490
2631	G_260170	-0.76102	-0.56667	0.948824		108455 ESTs, Weakly similar to A25707 U1 snRNP 70K protein - human [H.sapiens] Hs.356151 N32072
2959	G_240717	-0.60127	-0.73333	0.948314		222635 ESTs, Moderately similar to plakophilin 2 [Homo sapiens] [H.sapiens] Hs.205017 H78150
3256	G_241029	0.73433	0.6	0.948283		163388 STK12 serine/threonine kinase 12 Hs.180655 H81023 ARK2=aurora-related kinase 2 9212
3466	G_415102	0.63846	0.7	0.947434		107805 CDC25C cell division cycle 25C Hs.656 W95000 cdc25C=M-phase inducer phosphatase 3 995
1197	G_324717	-0.5329	-0.78333	0.947411		222952 CFL2 cofilin 2 (muscle) Hs.180141 W47363 1073
642	G_428231	-0.59933	-0.73333	0.947085		109210 BIRC3 baculoviral IAP repeat-containing 3 Hs.127799 AA002125 c-IAP2=MIHC=IAP homolog C=TNFR2-TRAF signalling complex prot 330
4288	G_489535	-0.50602	-0.8	0.946602		103996 NRP1 neuropilin 1 Hs.69285 AA098867 8829
4555	G_281517	-0.67172	-0.66667	0.946391		224606 Homo sapiens cDNA FLJ12425 fis, clone MAMMA1003104 Hs.9299 N47979
916	G_2577230	-0.71665	-0.61667	0.945447		331075 TNC tenascin C (hexabrachion) Hs.289114 AW075585 3371
2715	G_955521	-0.57419	-0.75	0.94456		107021 ESTs Hs.165337 AA506672
752	G_213502	-0.59511	-0.73333	0.94442		116889 CD53 CD53 antigen Hs.82212 H70124 CD53 963
4405	G_755612	0.86998	0.36667	0.944093		114328 MGC29643 hypothetical protein MGC29643 Hs.372651 AA419214 116372
3482	G_626206	0.6681	0.66667	0.943825		111418 FLJ10719 hypothetical protein FLJ10719 Hs.334828 AA188629 55215
2776	G_321470	-0.65068	-0.68333	0.94357		104270 **ESTs, Highly similar to G34323 GTP-binding protein Rab6 - human [H.sapiens] Hs.381078 W32303
943	G_742041	-0.65066	-0.68333	0.943556		318095 CALD1 caldesmon 1 Hs.325474 AA402898 800
2497	G_1457420	-0.6985	-0.63333	0.942873		223772 KIAA0905 yeast Sec31p homolog Hs.70266 AA922919 22872
926	G_365098	-0.57139	-0.75	0.942861		111365 BNIP3L BCL2/adenovirus E1B 19kDa interacting protein 3-like Hs.132955 AA025112 665
5115	G_238689	0.72468	0.6	0.94083		99686 FLJ20150 hypothetical protein FLJ20150 Hs.108502 H67236 54836
2856	G_740564	-0.64654	-0.68333	0.94072		109159 ESTs Hs.98800 AA477550
315	G_753198	0.69528	0.63333	0.94049		111783 CDCA7 cell division cycle associated 7 Hs.333893 AA406348 83879
1085	G_1697364	-0.6458	-0.68333	0.940211		311377 RE2 G-protein coupled receptor Hs.301642 AI095828 23432
3043	G_377384	-0.81416	-0.46667	0.938423		310010 NR2F2 **nuclear receptor subfamily 2, group F, member 2 Hs.347991 AA055076 7026
295	G_71606	-0.5399	-0.76667	0.937697		110248 NKG7 natural killer cell group 7 sequence Hs.10306 T57859 HKG7=cell surface protein in NK and T cells=G-CSF-induced ge 4818
5049	G_2019798	-0.72056	-0.6	0.93766		311291 COL9A2 collagen, type IX, alpha 2 Hs.37165 AI493478 1298
3408	G_366414	0.65934	0.66667	0.937645		222600 UHRF1 **ubiquitin-like, containing PHD and RING finger domains, 1 Hs.108106 AA026356 29128
183	G_784178	-0.53926	-0.76667	0.937328		109613 **Homo sapiens mRNA; cDNA DKFZp586M0723 (from clone DKFZp586M0723) Hs.27860 AA446650
1561	G_797048	0.62312	0.7	0.937165		111942 BMP4 bone morphogenetic protein 4 Hs.68879 AA463224 652
1025	G_1635779	-0.65837	-0.66667	0.936963		307365 DKFZP564O0823 DKFZP564O0823 protein Hs.105460 AA995890 25849
634	G_810242	-0.53684	-0.76667	0.935938		118876 C3AR1 complement component 3a receptor 1 Hs.155935 AA464711 AZ3B=C3a anaphylatoxin G protein-coupled receptor 719
1616	G_729924	-0.65641	-0.66667	0.935587		112747 Homo sapiens mRNA; cDNA DKFZp666J235 (from clone DKFZp666J235) Hs.313515 AA399633
2709	G_1659533	-0.71781	-0.6	0.935549		310750 MATN4 matrilin 4 Hs.278489 AI038302 8785
4938	G_1857884	-0.81969	-0.45	0.935089		314395 AI246155
2000	G_297439	-0.60058	-0.71667	0.935047		101586 Homo sapiens cDNA FLJ13207 fis, clone NT2RP4000023 Hs.14355 N80161
308	G_2250736	0.86014	0.36667	0.935034		313415 SCGB2A1 secretoglobin, family 2A, member 1 Hs.97644 AI659370 4246
3385	G_432611	0.68742	0.63333	0.934694		221979 ESTs Hs.193213 AA699443
4387	G_725709	0.82728	0.43333	0.933899		314626 PRSS2 protease, serine, 2 (trypsin 2) Hs.241561 AA394198 5645
527	G_345469	-0.80888	-0.46667	0.933846		109676 MGC15476 thymus expressed gene 3-like Hs.134185 W72525 147906
1728	G_954717	-0.61716	-0.7	0.933213		110656 Homo sapiens cDNA FLJ33834 fis, clone CTONG2004264, moderately similar to NEUROBLAST DIFFERENTIATION ASSOCIATED PROTEIN AHNAK Hs.378738 AA503978
2698	G_431988	-0.65301	-0.66667	0.933205		222802 ESTs Hs.176376 AA678242
1369	G_788136	-0.71426	-0.6	0.932828		119517 PDE4B phosphodiesterase 4B, cAMP-specific (phosphodiesterase E4 dunce homolog, Drosophila) Hs.188 AA453293 5142
1703	G_344589	-0.55429	-0.75	0.932597		112803 LCP1 lymphocyte cytosolic protein 1 (L-plastin) Hs.381099 W73144 L-plastin=actin-binding protein 3936
2022	G_726571	-0.59538	-0.71667	0.931715		108680 SMBP SM-11044 binding protein Hs.8203 AA394156 56889
367	G_855422	-0.5747	-0.73333	0.931694		227043 DLC1 deleted in liver cancer 1 Hs.8700 AA664020 10395
1958	G_595637	-0.72618	-0.58333	0.931457		103411 Homo sapiens mRNA; cDNA DKFZp586N012 (from clone DKFZp586N012) Hs.12702 AA173610
4312	G_701481	0.71238	0.6	0.931389		113885 MX2 myxovirus (influenza virus) resistance 2 (mouse) Hs.926 AA286908 MxB=interferon-induced cellular resistance mediator protein 4600
962	G_784180	-0.65028	-0.66667	0.931296		108632 DKFZp434D0215 hypothetical protein DKFZp434D0215 Hs.24715 AA446651 152503
4025	G_258631	0.7119	0.6	0.931022		227024 ESTs Hs.44324 N32216
3467	G_825606	0.72556	0.58333	0.930973		112982 KNSL1 kinesin-like 1 Hs.8878 AA504625 3832
5018	G_23819	-0.63164	-0.68333	0.930542		100788 ABCG1 ATP-binding cassette, sub-family G (WHITE), member 1 Hs.10237 R39446 9619
2751	G_428431	-0.66524	-0.65	0.930078		114859 PKIB protein kinase (cAMP-dependent, catalytic) inhibitor beta Hs.106106 AA004415 5570
2982	G_119384	0.72407	0.58333	0.929812		117745 CHIT1 chitinase 1 (chitotriosidase) Hs.91093 T94272 1118
2993	G_197651	-0.6958	-0.61667	0.929742		114617 EG1 endothelial-derived gene 1 Hs.33032 R93651 80306
504	G_345925	-0.41159	-0.83333	0.929433		114280 KRT5 keratin 5 (epidermolysis bullosa simplex, Dowling-Meara/Kobner/Weber-Cockayne types) Hs.195850 W72110 3852
3245	G_281597	-0.78342	-0.5	0.92938		225703 Homo sapiens cDNA FLJ20201 fis, clone COLF1210 Hs.27267 N51612
5073	G_195079	-0.66375	-0.65	0.929012		114252 R91146
4816	G_1677623	-0.67914	-0.63333	0.928622		318209 ESTs, Moderately similar to I37240 chloride channel protein 3, long form - human [H.sapiens] Hs.134630 AI082134
664	G_361323	-0.56828	-0.73333	0.927747		119039 RGS1 regulator of G-protein signalling 1 Hs.75256 AA017417 5996
1558	G_2314305	0.78793	0.48333	0.92436		312629 CDKN1C cyclin-dependent kinase inhibitor 1C (p57, Kip2) Hs.106070 AI676118 1028
1538	G_376802	0.68464	0.62083	0.924209		98445 AA047570
620	G_770014	-0.46174	-0.8	0.92369		111056 TRA@ T cell receptor alpha locus Hs.74647 AA427491 6955
1103	G_759173	-0.81531	-0.43333	0.923312		112221 PYGM phosphorylase, glycogen; muscle (McArdle syndrome, glycogen storage disease type V) Hs.154084 AA436943 5837
1275	G_488956	-0.63873	-0.66667	0.923269		245683 CUGBP2 CUG triplet repeat, RNA binding protein 2 Hs.211610 AA057142 Human RNA binding protein Etr-3 mRNA complete cds 10659
657	G_1893136	-0.62017	-0.68333	0.922795		313617 ESTs Hs.145968 AI278518
712	G_147050	-0.63775	-0.66667	0.922591		113323 PTGS2 prostaglandin-endoperoxide synthase 2 (prostaglandin G/H synthase and cyclooxygenase) Hs.196384 R80217 PTGS2=prostaglandin endoperoxide synthase-2=cyclooxygenase-2 5743
2855	G_768562	-0.6541	-0.65	0.922143		105955 ZFP103 zinc finger protein 103 homolog (mouse) Hs.155968 AA425020 7844
222	G_1622149	-0.61888	-0.68333	0.921929		307358 ED1 ectodermal dysplasia 1, anhidrotic Hs.105407 AI015138 1896
3402	G_788205	0.69958	0.6	0.921636		107550 SOX4 SRY (sex determining region Y)-box 4 Hs.83484 AA453420 6659
3305	G_950459	0.45699	0.8	0.921325		308323 LOC166994 integral membrane glycoprotein-like Hs.356638 AA599106 166994
1574	G_897518	-0.8292	-0.4	0.920637		105553 RECK reversion-inducing-cysteine-rich protein with kazal motifs Hs.29640 AA496930 8434
4824	G_725501	-0.72488	-0.56667	0.92009		100678 ZID zinc finger protein with interaction domain Hs.3053 AA292994 10773
4860	G_784168	-0.66727	-0.63333	0.919976		120741 Homo sapiens mRNA; cDNA DKFZp564A072 (from clone DKFZp564A072) Hs.7780 AA432103
925	G_28475	-0.7102	-0.58333	0.919053		109370 CRYZ crystallin, zeta (quinone reductase) Hs.83114 R13434 1429
4495	G_811069	0.55282	0.73333	0.918359		103618 Homo sapiens mRNA; cDNA DKFZp313K1012 (from clone DKFZp313K1012) Hs.99480 AA485454
775	G_1607473	-0.69512	-0.6	0.918255		310562 Homo sapiens cDNA FLJ34819 fis, clone NT2NE2008213 Hs.157101 AI014470
3449	G_1517595	0.64843	0.65	0.918129		226162 MELK maternal embryonic leucine zipper kinase Hs.184339 AA903137 9833
4600	G_26249	0.84061	0.36667	0.9171		119765 SH3GL2 SH3-domain GRB2-like 2 Hs.75149 R12817 6456
86	G_431505	-0.62978	-0.66667	0.9171		226222 ABHD2 abhydrolase domain containing 1 Hs.99364 AA676225 11057
1449	G_41822	-0.64665	-0.65	0.916873		120838 TRPS1 trichorhinophalangeal syndrome I Hs.26102 R54192 7227
1611	G_1880757	-0.61117	-0.68333	0.916771		310133 MAP3K5 mitogen-activated protein kinase kinase kinase 5 Hs.151988 AI268273 4217
822	G_586854	-0.73313	-0.55	0.916504		111017 PTPN14 protein tyrosine phosphatase, non-receptor type 14 Hs.159238 AA130874 5784
4997	G_1675553	-0.61063	-0.68333	0.916411		307221 H2BFR H2B histone family, member R Hs.285735 AI076718 8970
3382	G_811046	0.67541	0.61667	0.914582		109768 CRIP2 cysteine-rich protein 2 Hs.70327 AA485427 1397
1600	G_377166	-0.74189	-0.53333	0.913697		112833 CASQ2 calsequestrin 2 (cardiac muscle) Hs.57975 AA055163 845
733	G_768370	-0.58588	-0.7	0.912828		116844 **Homo sapiens cDNA FLJ11796 fis, clone HEMBA1006158, highly similar to Homo sapiens transcription factor forkhead-like 7 (FKHL7) gene Hs.284186 AA495790
1384	G_1527212	0.8121	0.41667	0.912754		225350 NAV2 neuron navigator 2 Hs.23467 AA918601 89797
4676	G_428184	-0.67217	-0.61667	0.912192		220510 MGC18216 hypothetical protein MGC18216 Hs.104679 AA001709 145815
296	G_300973	-0.70124	-0.58333	0.912147		119161 CD8A CD8 antigen, alpha polypeptide (p32) Hs.85258 N80692 CD8 alpha chain 925
1213	G_306513	-0.56417	-0.71667	0.912088		220157 Homo sapiens cDNA FLJ36866 fis, clone ASTRO2016313 Hs.339024 N91811
3454	G_624627	0.69964	0.58333	0.910917		109251 RRM2 ribonucleotide reductase M2 polypeptide Hs.75319 AA187351 6241
4811	G_754358	-0.68485	-0.6	0.910505		116081 SPOCK sparc/osteonectin, cwcv and kazal-like domains proteoglycan (testican) Hs.93029 AA436142 6695
2390	G_204257	-0.653	-0.63333	0.909679		114650 ADAM9 a disintegrin and metalloproteinase domain 9 (meltrin gamma) Hs.2442 H59230 8754
5009	G_754628	-0.51421	-0.75	0.909347		118123 ESTs Hs.25933 AA411392
4568	G_302221	-0.58026	-0.7	0.909231		100730 **ESTs, Weakly similar to A43932 mucin 2 precursor, intestinal - human (fragments) [H.sapiens] Hs.107319 N77828
1662	G_364555	-0.66814	-0.61667	0.909227		117771 Homo sapiens cDNA FLJ40765 fis, clone TRACH2003272 Hs.203213 AA022600
3354	G_244058	0.6179	0.66667	0.908983		102143 CDCA7 cell division cycle associated 7 Hs.333893 N38809 83879
5045	G_341336	-0.57972	-0.7	0.908887		103507 PHCA phytoceramidase, alkaline Hs.23862 W58013 55331
2742	G_417908	-0.48753	-0.76667	0.908553		101886 ESTs Hs.103238 W90519
343	G_210921	-0.65035	-0.63333	0.907779		111776 MAIL molecule possessing ankyrin repeats induced by lipopolysaccharide (MAIL), homolog of mouse Hs.301183 H69786 64332
2706	G_272576	-0.65012	-0.63333	0.907614		226407 KIAA0830 KIAA0830 protein Hs.167115 N35907 23052
209	G_593537	-0.707	-0.56667	0.906071		115688 MGC39708 **hypothetical protein MGC39708 Hs.374773 AA165409 223117
1601	G_611581	-0.6312	-0.65	0.906043		109953 TNNI1 troponin I, skeletal, slow Hs.84673 AA182429 7135
756	G_141806	-0.59466	-0.68333	0.905848		163434 TNFAIP3 tumor necrosis factor, alpha-induced protein 3 Hs.211600 R70479 A20=TNF alpha inducible, TRAF1,2 binding inhibitor of NF-kB 7128
289	G_450338	0.73197	0.53333	0.905661		225322 EST Hs.119778 AA703625
1079	G_346583	-0.66269	-0.61667	0.905229		119834 LPHH1 latrophilin 1 Hs.24212 W74533 23266
3423	G_814072	0.6778	0.6	0.905214		226956 CDCA4 cell division cycle associated 4 Hs.34045 AA465342 55038
780	G_79022	-0.62973	-0.65	0.905019		99981 FOSB FBJ murine osteosarcoma viral oncogene homolog B Hs.75678 T61948 FosB=G0S3 2354
4292	G_300276	-0.5928	-0.68333	0.904628		120099 LOC51170 retinal short-chain dehydrogenase/reductase retSDR2 Hs.12150 N79745 51170
1808	G_1909706	-0.73048	-0.53333	0.904457		312038 EST Hs.156590 AI342954
1837	G_359661	-0.72991	-0.53333	0.903996		107511 MAOA monoamine oxidase A Hs.183109 AA011095 monoamine oxidase A 4128
1529	G_32696	-0.64468	-0.63333	0.903725		99696 Homo sapiens mRNA; cDNA DKFZp547E184 (from clone DKFZp547E184) Hs.8077 R43604
2640	G_303139	-0.72856	-0.53333	0.902907		113259 FLJ14054 hypothetical protein FLJ14054 Hs.13528 N90806 79614
401	G_309583	0.64346	0.63333	0.902855		109528 RARRES1 retinoic acid receptor responder (tazarotene induced) 1 Hs.82547 N94424 5918
833	G_2435216	0.65935	0.61667	0.902787		331298 PYGL phosphorylase, glycogen; liver (Hers disease, glycogen storage disease type VI) Hs.771 AI869845 5836
3347	G_809530	0.56995	0.7	0.902687		116625 MCM2 MCM2 minichromosome maintenance deficient 2, mitotin (S. cerevisiae) Hs.57101 AA454572 4171
1196	G_504915	-0.44856	-0.78333	0.902669		308117 CFL2 cofilin 2 (muscle) Hs.180141 AA150997 1073
2951	G_745090	0.5886	0.68333	0.901881		226565 FLJ23033 hypothetical protein FLJ23033 Hs.96423 AA626351 79739
745	G_271441	-0.52448	-0.73333	0.901583		101660 FLJ23306 hypothetical protein FLJ23306 Hs.5890 N34799 fra-2=fos-related antigen 2 79579
1066	G_133988	0.75987	0.48333	0.900561		223839 FACL4 fatty-acid-Coenzyme A ligase, long-chain 4 Hs.81452 R28548 2182
4791	G_796088	-0.65622	-0.61667	0.900504		121027 ZNF217 zinc finger protein 217 Hs.155040 AA460368 7764
3290	G_1472499	0.44351	0.78333	0.900171	AQP6	221853 AQP6 aquaporin 6, kidney specific Hs.54505 AA872916 363
4337	G_344430	0.52142	0.73333	0.899806		104674 BMP7 bone morphogenetic protein 7 (osteogenic protein 1) Hs.170195 W73473 OP-1=osteogenic protein in the TGF-beta family 655
1784	G_207989	-0.69862	-0.56667	0.899547		117986 KIAA0022 KIAA0022 gene product Hs.2441 H60460 9936
1834	G_48518	-0.75795	-0.48333	0.898942		100992 ABCA5 ATP-binding cassette, sub-family A (ABC1), member 5 Hs.180513 H14372 23461
2273	G_310584	-0.63691	-0.63333	0.898199		247384 Homo sapiens cDNA FLJ10627 fis, clone NT2RP2005555 Hs.372616 N98729 EST
4521	G_2028238	-0.61933	-0.65	0.897814		308785 PDZD2 PDZ domain containing 2 Hs.173035 AI262154 23037
2383	G_1655795	-0.72052	-0.53333	0.896432		319571 LOC55970 G-protein gamma-12 subunit Hs.8107 AI033539 55970
2733	G_252453	-0.76505	-0.46667	0.896149		113949 LOC51635 CGI-86 protein Hs.109201 H87143 51635
1694	G_136260	-0.7741	-0.45	0.895394		102242 IMMP2L inner mitochondrial membrane peptidase 2 like Hs.89576 R33650 83943
1027	G_76169	-0.75297	-0.48333	0.894747		101777 CMG2 capillary morphogenesis protein 2 Hs.5897 T59658 118429
4283	G_50882	-0.5953	-0.66667	0.893773		104921 ECE1 endothelin converting enzyme 1 Hs.288203 H18427 1889
2365	G_1592953	-0.61316	-0.65	0.893569		308397 JAK1 Janus kinase 1 (a protein tyrosine kinase) Hs.50651 AA985527 3716
3949	G_306812	-0.76191	-0.46667	0.893469		223377 LOC114990 hypothetical protein BC013767 Hs.348385 N79049 114990
787	G_753467	-0.71638	-0.53333	0.893108		118837 SLC2A3 solute carrier family 2 (facilitated glucose transporter), member 3 Hs.7594 AA406551 6515
3469	G_131316	0.61192	0.65	0.892718		119890 ESTs, Weakly similar to A43932 mucin 2 precursor, intestinal - human (fragments) [H.sapiens] Hs.339665 R22949
707	G_781017	-0.64549	-0.61667	0.892715		113071 EGR2 early growth response 2 (Krox-20 homolog, Drosophila) Hs.1395 AA446027 1959
408	G_812053	-0.73897	-0.5	0.892231		102795 Homo sapiens cDNA FLJ13585 fis, clone PLACE1009150 Hs.43047 AA455980
5146	G_287598	0.5079	0.73333	0.89204		111608 ESTs Hs.269104 N62132
1405	G_235909	0.65966	0.6	0.891713		226114 STARD4 START domain containing 4, sterol regulated Hs.93842 H52247 134429
1720	G_150041	-0.52987	-0.71667	0.891279		118895 KIAA0981 KIAA0981 protein Hs.158135 H01819 23058
654	G_23794	-0.50632	-0.73333	0.891141		115173 Rab11-FIP3 KIAA0665 gene product Hs.119004 R38361 9727
953	G_81417	-0.62691	-0.63333	0.891136		111603 RNASE4 ribonuclease, RNase A family, 4 Hs.283749 T60163 6038
1100	G_381066	-0.42473	-0.78333	0.891068		98506 SERPING1 serine (or cysteine) proteinase inhibitor, clade G (C1 inhibitor), member 1, (angioedema, hereditary) Hs.151242 AA057434 710
3255	G_242578	0.59028	0.66667	0.890438		101721 TROAP trophinin associated protein (tastin) Hs.171955 H94949 10024
4808	G_593185	-0.7955	-0.4	0.890405		111658 ABCC4 ATP-binding cassette, sub-family C (CFTR/MRP), member 4 Hs.139336 AA159714 10257
624	G_2443695	-0.4231	-0.78333	0.890292		330849 HLA-DRB4 major histocompatibility complex, class II, DR beta 4 Hs.318720 AI890760 3126
336	G_257999	0.62501	0.63333	0.8898		222982 Homo sapiens cDNA FLJ11363 fis, clone HEMBA1000251 Hs.287406 N27086
4988	G_1009808	-0.83765	-0.3	0.889751		102275 NKX3A NK3 transcription factor homolog A (Drosophila) Hs.55999 AA229629 4824
4389	G_878280	0.83731	0.3	0.889431		109244 CRMP1 collapsin response mediator protein 1 Hs.155392 AA670279 1400
1051	G_814259	-0.6243	-0.63333	0.889302		307840 SSPN sarcospan (Kras oncogene-associated gene) Hs.183428 AA458998 8082
2651	G_146671	-0.68521	-0.56667	0.889172		310819 IL1R1 interleukin 1 receptor, type I Hs.82112 R80179 3554
4749	G_2541460	-0.52592	-0.71667	0.888936		331121 UNC13 unc-13-like (C. elegans) Hs.155001 AW057930 10497
1402	G_214858	-0.42272	-0.77917	0.886453		108971 LDB2 LIM domain binding 2 Hs.4980 H73914 9079
3396	G_812246	0.80686	0.36667	0.886267		104201 HLCS holocarboxylase synthetase (biotin-[proprionyl-Coenzyme A-carboxylase (ATP-hydrolysing)] ligase) Hs.79375 AA455043 3141
3424	G_768260	0.70734	0.53333	0.885873		105417 E2F1 E2F transcription factor 1 Hs.96055 AA424949 1869
2705	G_1535596	-0.63552	-0.61667	0.885532		223502 ARSDR1 androgen-regulated short-chain dehydrogenase/reductase 1 Hs.179817 AA918370 51109
2687	G_754311	-0.58253	-0.66667	0.885319		102802 KIAA1265 KIAA1265 protein Hs.355925 AA479302 57181
339	G_810512	-0.66533	-0.58333	0.884838		113595 THBS1 thrombospondin 1 Hs.87409 AA464532 7057
50	G_2238407	0.37674	0.8	0.88427		229000 ESTs, Moderately similar to hypothetical protein DKFZp434A171 [Homo sapiens] [H.sapiens] Hs.131547 AI918864
750	G_842836	-0.53938	-0.7	0.883703		104934 SERPINB1 serine (or cysteine) proteinase inhibitor, clade B (ovalbumin), member 1 Hs.183583 AA486275 1992
2618	G_1504457	0.648	0.6	0.883122		224815 KIAA0940 KIAA0940 protein Hs.131945 AA904806 22849
1998	G_898393	-0.70324	-0.53333	0.882603		101139 Homo sapiens cDNA FLJ10577 fis, clone NT2RP2003367 Hs.153321 AA599014
90	G_271743	0.59694	0.65	0.882518		110960 FLJ22794 **hypothetical protein FLJ22794 Hs.19525 N35115 63901
3419	G_1600239	0.7151	0.51667	0.882222		306864 LOC51659 HSPC037 protein Hs.108196 AA961752 51659
1626	G_85097	-0.66172	-0.58333	0.882127		104125 PROS1 protein S (alpha) Hs.64016 T74191 5627
4889	G_359713	-0.59616	-0.65	0.88199		108246 FLJ14431 hypothetical protein FLJ14431 Hs.71616 AA010756 84869
489	G_490023	-0.6463	-0.6	0.881875		102586 WNT5B wingless-type MMTV integration site family, member 5B Hs.306051 AA114966 81029
1008	G_898122	-0.70211	-0.53333	0.881703		101391 C7 complement component 7 Hs.78065 AA598478 730
1276	G_435573	-0.62982	-0.61667	0.881451		223592 CUGBP2 CUG triplet repeat, RNA binding protein 2 Hs.211610 AA701933 10659
3989	G_686081	0.73673	0.48333	0.881124		116720 PTPN7 protein tyrosine phosphatase, non-receptor type 7 Hs.35 AA262196 LPTPase=inducible lymphoid-specific, protein tyrosine phosph 5778
1230	G_42070	0.48801	0.73333	0.880867		116156 NT5E 5'-nucleotidase, ecto (CD73) Hs.153952 R60343 4907
532	G_32576	-0.43025	-0.76667	0.879146		108027 DKFZP761F241 **hypothetical protein DKFZp761F241 Hs.107253 R20416 83643
202	G_462655	0.69756	0.53333	0.878084		316587 ESTs, Weakly similar to L1 repeat, Tf subfamily, member 30 [Mus musculus] [M.musculus] Hs.374036 AA705010
3427	G_343562	0.70996	0.51667	0.878061		98538 CIT citron (rho-interacting, serine/threonine kinase 21) Hs.15767 W69425 11113
2691	G_428782	-0.48213	-0.73333	0.877623		100095 PRO2730 hypothetical protein PRO2730 Hs.194110 AA005230 80335
5051	G_433155	-0.75271	-0.45	0.876968		114374 F5 coagulation factor V (proaccelerin, labile factor) Hs.30054 AA680136 2153
572	G_261246	-0.46127	-0.74583	0.876945		221003 SPTBN1 spectrin, beta, non-erythrocytic 1 Hs.107164 H98241 6711
2043	G_745103	-0.58798	-0.65	0.876482		224990 PTD002 PTD002 protein Hs.41767 AA626365 51397
1810	G_72600	-0.66839	-0.56667	0.876276		117948 FLJ10983 hypothetical protein FLJ10983 Hs.23363 T51990 55276
5109	G_138861	-0.5036	-0.71667	0.875916		115598 DKFZP566B0846 nectin 3 Hs.21201 R62780 25945
3409	G_454469	0.65341	0.58333	0.87591		222033 ESTs Hs.173495 AA677337
1839	G_359781	-0.54785	-0.68333	0.875831		117248 SPTB spectrin, beta, erythrocytic (includes spherocytosis, clinical type I) Hs.47431 AA010932 6710
3614	G_809995	-0.74045	-0.46667	0.875241		114155 LOC51024 CGI-135 protein Hs.84344 AA454862 51024
1649	G_744979	-0.69343	-0.53333	0.874806		224379 DKFZp434N0650 hypothetical protein DKFZp434N0650 Hs.381214 AA625922 84221
158	G_192481	-0.72889	-0.48333	0.874579		114345 NRXN2 neurexin 2 Hs.124085 H41237 9379
3650	G_811923	0.56602	0.66667	0.874544		309030 POLE polymerase (DNA directed), epsilon Hs.166846 AA454666 5426
48	G_782537	-0.70487	-0.51667	0.873951		119362 Homo sapiens cDNA FLJ30428 fis, clone BRACE2008941 Hs.131740 AA432049
5150	G_1461477	-0.61895	-0.61667	0.873717		312600 Homo sapiens mRNA; cDNA DKFZp586I0324 (from clone DKFZp586I0324) Hs.193700 AA885283
4998	G_201125	-0.5838	-0.65	0.873683		221733 H2BFG **H2B histone family, member G Hs.182137 R98472 8343
574	G_427767	-0.56442	-0.66667	0.873509		98854 Homo sapiens clone IMAGE:119716, mRNA sequence Hs.17385 AA002207
599	G_258860	-0.52163	-0.7	0.872982		111150 HLA-DQA1 **major histocompatibility complex, class II, DQ alpha 1 Hs.198253 N30205 3117
4699	G_855616	-0.60046	-0.63333	0.872731		220413 PRKAR2A protein kinase, cAMP-dependent, regulatory, type II, alpha Hs.365523 AA664240 5576
2650	G_138265	-0.75732	-0.43333	0.87253		109049 IL1R1 interleukin 1 receptor, type I Hs.82112 R56687 IL-1 receptor type I 3554
5125	G_109307	-0.66291	-0.56667	0.872104		100494 NFS1 NFS1 nitrogen fixation 1 (S. cerevisiae) Hs.194692 T80855 9054
1849	G_85409	-0.56175	-0.66667	0.871787		118925 CREG cellular repressor of E1A-stimulated genes Hs.5710 T71991 8804
5011	G_461592	-0.59905	-0.63333	0.871761		226393 H2BFQ H2B histone family, member Q Hs.2178 AA705142 8349
522	G_1739569	-0.77416	-0.4	0.871392		112799 ESTs Hs.49265 AI140241
1214	G_488130	-0.63177	-0.6	0.871283		118032 Homo sapiens cDNA FLJ20767 fis, clone COL06986 Hs.24192 AA047418
1397	G_275798	0.79034	0.36667	0.871254		114885 SIAT9 sialyltransferase 9 (CMP-NeuAc:lactosylceramide alpha-2,3-sialyltransferase; GM3 synthase) Hs.225939 R93185 8869
3445	G_122397	0.68887	0.53333	0.871196		102342 FLJ20311 hypothetical protein FLJ20311 Hs.18616 T99311 54892
4912	G_624271	-0.70132	-0.51667	0.87109		221422 CAMKK2 calcium/calmodulin-dependent protein kinase kinase 2, beta Hs.108708 AA181179 10645
4931	G_324815	-0.79642	-0.35	0.869934		114982 PLCB4 **phospholipase C, beta 4 Hs.283006 W49562 PLCB4=phospholipase C beta 4 5332
3511	G_84371	-0.5958	-0.63333	0.869531		222013 KIAA0935 KIAA0935 protein Hs.12183 T73695 23324
1835	G_755240	-0.78784	-0.36667	0.868987		106023 ABCA5 **ATP-binding cassette, sub-family A (ABC1), member 5 Hs.180513 AA422008 23461
5013	G_296444	-0.64391	-0.58333	0.868846		118451 CGN cingulin Hs.18376 N70196 57530
1240	G_758088	-0.59476	-0.63333	0.868819		316374 CALD1 caldesmon 1 Hs.325474 AA426421 800
673	G_684661	-0.49049	-0.71667	0.868445		111234 RTVP1 **glioma pathogenesis-related protein Hs.64639 AA251800 11010
3465	G_1035796	0.55651	0.66667	0.868419		225262 ESTs, Weakly similar to A43932 mucin 2 precursor, intestinal - human (fragments) [H.sapiens] Hs.339665 AA628867
3446	G_1564601	0.7423	0.45	0.868049		308493 Homo sapiens, clone IMAGE:4081483, mRNA Hs.186579 AA960844
2788	G_130541	-0.46351	-0.73333	0.867534		101409 PECAM1 platelet/endothelial cell adhesion molecule (CD31 antigen) Hs.78146 R22412 5175
4718	G_825092	-0.60969	-0.61667	0.867182		161631 CTH cystathionase (cystathionine gamma-lyase) Hs.19904 AA489240 Cystathionase (cystathionine gamma-lyase) 1491
4686	G_1901141	-0.79241	-0.35	0.866264		316415 FLJ20967 hypothetical protein FLJ20967 Hs.17433 AI301512 63898
4976	G_809824	-0.80595	-0.31667	0.86593		116205 TMEPAI transmembrane, prostate androgen induced RNA Hs.83883 AA455519 56937
4970	G_1007581	-0.6388	-0.58333	0.865066		108637 TMPRSS2 transmembrane protease, serine 2 Hs.318545 AA225817 7113
3492	G_431001	0.68106	0.53333	0.865034		224315 LOC51004 CGI-10 protein Hs.12239 AA677920 51004
2847	G_141726	-0.6063	-0.61667	0.864801		102537 ESTs, Weakly similar to cytokine receptor-like factor 2; cytokine receptor CRL2 precusor [Homo sapiens] [H.sapiens] Hs.269392 R69584
2711	G_1639531	-0.58879	-0.63333	0.864743		309617 RAB27A RAB27A, member RAS oncogene family Hs.50477 AI032392 5873
5050	G_1698856	-0.62251	-0.6	0.864592		114741 COL9A2 collagen, type IX, alpha 2 Hs.37165 AI003467 1298
420	G_145112	-0.57	-0.65	0.864523		108510 ICAM1 intercellular adhesion molecule 1 (CD54), human rhinovirus receptor Hs.168383 R77293 CD54=ICAM-1 3383
157	G_340722	-0.70519	-0.5	0.864461		110009 MLF1 myeloid leukemia factor 1 Hs.85195 W56334 4291
4225	G_451397	-0.63756	-0.58333	0.864151		221987 ESTs Hs.65300 AA707171
2636	G_162199	-0.50646	-0.7	0.864003		116425 PTPRM protein tyrosine phosphatase, receptor type, M Hs.154151 H26353 R-PTP-mu=receptor protein tyrosine phosphatase mu 5797
766	G_472185	-0.62129	-0.6	0.863714		107787 ADAMTS1 a disintegrin-like and metalloprotease (reprolysin type) with thrombospondin type 1 motif, 1 Hs.8230 AA057170 9510
4940	G_814145	-0.75591	-0.41667	0.863142		310039 AIBZIP androgen-induced basic leucine zipper Hs.372924 AA465402 148327
2806	G_509731	-0.74599	-0.43333	0.862714		104425 TM4SF3 transmembrane 4 superfamily member 3 Hs.84072 AA045698 CO-029=transmembrane tumor associated antigen 7103
3525	G_841641	-0.81454	-0.28333	0.86241		104326 CCND1 cyclin D1 (PRAD1: parathyroid adenomatosis 1) Hs.82932 AA487486 Cyclin D1=BCL1=PRAD1=Translocated in mantle cell leukemia 595
412	G_199945	-0.6776	-0.53333	0.862312		113510 TGM2 transglutaminase 2 (C polypeptide, protein-glutamine-gamma-glutamyltransferase) Hs.8265 R97066 7052
773	G_53245	-0.54688	-0.66667	0.86228		310856 Homo sapiens, clone IMAGE:3867243, mRNA Hs.286014 R15978
3456	G_1911913	0.68981	0.51667	0.86185		317711 ESTs Hs.370736 AI278813
2515	G_452116	-0.73443	-0.45	0.861329		220763 Homo sapiens cDNA FLJ36210 fis, clone THYMU2000155 Hs.100636 AA707219
3452	G_781089	0.64769	0.56667	0.860591		103234 PTTG1 pituitary tumor-transforming 1 Hs.252587 AA430032 9232
531	G_76182	-0.58238	-0.63333	0.860391		120803 DKFZP761F241 hypothetical protein DKFZp761F241 Hs.107253 T59665 83643
2812	G_486055	-0.58197	-0.63333	0.860114		114179 CYP1B1 cytochrome P450, subfamily I (dioxin-inducible), polypeptide 1 (glaucoma 3, primary infantile) Hs.154654 AA040872 1545
4607	G_2017513	0.69858	0.5	0.859077		319575 KIAA1039 KIAA1039 protein Hs.301552 AI369713 23108
340	G_1566793	-0.4977	-0.7	0.858898		307193 EBI2 Epstein-Barr virus induced gene 2 (lymphocyte-specific G protein-coupled receptor) Hs.784 AI123732 1880
1329	G_462412	-0.44632	-0.73333	0.858472		225715 AA699878
1963	G_25517	-0.64411	-0.56667	0.8579		116608 BTD biotinidase Hs.78885 R11888 686
4464	G_179334	-0.7589	-0.4	0.857863		99076 TJP1 tight junction protein 1 (zona occludens 1) Hs.74614 H50344 7082
4887	G_454795	-0.59624	-0.61667	0.857779		220845 FLJ14431 hypothetical protein FLJ14431 Hs.71616 AA677300 84869
4910	G_342211	-0.62878	-0.58333	0.857694		108331 LOC129642 hypothetical protein BC016005 Hs.356547 W63789 129642
3953	G_744417	-0.67162	-0.53333	0.857621		111988 CRAT carnitine acetyltransferase Hs.12068 AA621218 1384
1604	G_133864	-0.53942	-0.66667	0.857568		108922 Homo sapiens cDNA FLJ37884 fis, clone BRSTN2012451 Hs.191045 R28512
4809	G_506564	-0.69662	-0.5	0.857484		222868 ARFGAP3 ADP-ribosylation factor GTPase activating protein 3 Hs.13014 AA709044 26286
3378	G_1947289	0.74885	0.41667	0.856966		319355 EST Hs.292428 AI350851
593	G_229365	-0.67051	-0.53333	0.856752		103969 PTPRC protein tyrosine phosphatase, receptor type, C Hs.170121 H74264 5788
3416	G_1694526	0.61089	0.6	0.856263		311247 FLJ14251 hypothetical protein FLJ14251 Hs.281462 AI124082 79939
4763	G_49728	-0.78136	-0.35	0.856168		120834 ESTs Hs.32458 H29197
1478	G_752640	-0.59245	-0.61667	0.855148		104244 FLJ10134 hypothetical protein FLJ10134 Hs.104800 AA417659 55076
2492	G_269923	-0.59237	-0.61667	0.855093		118873 C8orf2 chromosome 8 open reading frame 2 Hs.125849 N24894 11160
1375	G_212347	0.79424	0.31667	0.855042		102960 MGC33662 hypothetical protein MGC33662 Hs.107924 H68285 169792
4813	G_356732	-0.72678	-0.45	0.854815		107417 UTRN utrophin (homologous to dystrophin) Hs.286161 W84486 7402
2713	G_955337	-0.40956	-0.75	0.85454		117449 ESTs Hs.165337 AA506404
1078	G_897731	-0.55474	-0.65	0.854539		100805 LPHH1 latrophilin 1 Hs.24212 AA598995 23266
1624	G_345616	-0.67921	-0.51667	0.85339		100180 GPNMB glycoprotein (transmembrane) nmb Hs.82226 W72431 10457
4939	G_1857589	-0.77057	-0.36667	0.853361		312541 AI269390
2638	G_321816	-0.40651	-0.75	0.853083		245049 TNFAIP2 tumor necrosis factor, alpha-induced protein 2 Hs.101382 W37248 B94 PROTEIN 7127
1341	G_290110	-0.67877	-0.51667	0.85304		220398 KPNA3 karyopherin alpha 3 (importin alpha 4) Hs.3886 N62192 3839
511	G_269806	0.78507	0.33333	0.852903		106224 KIT v-kit Hardy-Zuckerman 4 feline sarcoma viral oncogene homolog Hs.81665 N24824 3815
3120	G_1552744	-0.48519	-0.7	0.85171		308276 CD2 CD2 antigen (p50), sheep red blood cell receptor Hs.89476 AA927710 914
1550	G_178950	0.70124	0.48333	0.851672		107105 SYN1 synapsin I Hs.225936 H48153 6853
1263	G_703383	-0.5688	-0.63333	0.851258		187293 AA258057 Unknown UG Hs.175511 ESTs sc_id827
727	G_309864	-0.52867	-0.66667	0.850847		115464 JUNB jun B proto-oncogene Hs.198951 N94468 3726
140	G_666492	0.82675	0.2	0.850597		118650 KIAA0552 KIAA0552 gene product Hs.90232 AA233070 9762
672	G_325365	-0.45718	-0.71667	0.850076		118290 HRB2 HIV-1 rev binding protein 2 Hs.154762 W52272 Unknown UG Hs.86489 ESTs 11103
1319	G_291623	-0.74072	-0.41667	0.849871		119269 MITF **microphthalmia-associated transcription factor Hs.166017 N67822 4286
311	G_154172	0.78172	0.33333	0.849821		110304 FCGBP Fc fragment of IgG binding protein Hs.111732 R52030 8857
1241	G_813627	-0.54738	-0.65	0.849779		308735 CALD1 caldesmon 1 Hs.325474 AA447737 800
1259	G_1538637	-0.49946	-0.6875	0.849774		316150 KIAA0605 KIAA0605 gene product Hs.200594 AI014304 9719
989	G_769015	-0.63303	-0.56667	0.849613		307955 Homo sapiens clone 24630 mRNA sequence Hs.171553 AA426321
135	G_723955	-0.72047	-0.45	0.849457		112160 EFNB2 ephrin-B2 Hs.30942 AA235700 1948
4514	G_290295	-0.63282	-0.56667	0.849456		104296 MGC29667 **hypothetical protein MGC29667 Hs.350558 N64473 143686
767	G_144797	-0.61693	-0.58333	0.849044		114187 ADAMTS1 a disintegrin-like and metalloprotease (reprolysin type) with thrombospondin type 1 motif, 1 Hs.8230 R76276 9510
2666	G_365149	-0.72986	-0.43333	0.848805		118980 FECH ferrochelatase (protoporphyria) Hs.26 AA025142 2235
3199	G_399075	-0.6166	-0.58333	0.848805		224829 Homo sapiens mRNA; cDNA DKFZp667E1121 (from clone DKFZp667E1121) Hs.58210 AA733003
4880	G_730313	-0.6603	-0.53333	0.848786		119154 Homo sapiens cDNA FLJ25252 fis, clone STM03814 Hs.16979 AA412520
1171	G_725877	-0.54571	-0.65	0.848705		104956 CLU **clusterin (complement lysis inhibitor, SP-40,40, sulfated glycoprotein 2, testosterone-repressed prostate message 2, apolipoprotein J) Hs.75106 AA292226 1191
788	G_770670	-0.50329	-0.68333	0.84867		104010 TNFAIP3 tumor necrosis factor, alpha-induced protein 3 Hs.211600 AA433807 7128
2734	G_280699	-0.74807	-0.4	0.848298		222592 UCC1 upregulated in colorectal cancer gene 1 Hs.46721 N47444 54749
5003	G_66317	-0.64556	-0.55	0.848085		105906 H1F2 H1 histone family, member 2 Hs.7644 T66815 3006
646	G_841238	-0.50227	-0.68333	0.848065		119897 Homo sapiens mRNA; cDNA DKFZp667P0610 (from clone DKFZp667P0610) Hs.237868 AA487121
4349	G_809784	0.72872	0.43333	0.847825		115237 KLK6 kallikrein 6 (neurosin, zyme) Hs.79361 AA454743 5653
4873	G_586826	-0.68464	-0.5	0.847781		221646 ESTs Hs.246973 AA130857
1535	G_878698	0.7863	0.31667	0.847672		224198 ESTs Hs.184067 AA775372
3407	G_825470	0.70703	0.46667	0.847155		100279 TOP2A topoisomerase (DNA) II alpha 170kDa Hs.156346 AA504348 7153
4867	G_1540478	-0.54318	-0.65	0.84708		309269 Homo sapiens cDNA FLJ35632 fis, clone SPLEN2011678 Hs.120591 AA928113
2854	G_613056	-0.68351	-0.5	0.846868		306842 RCN1 reticulocalbin 1, EF-hand calcium binding domain Hs.167791 AA181593 5954
4565	G_767345	0.67059	0.51667	0.846545		103680 Homo sapiens cDNA FLJ40901 fis, clone UTERU2003704 Hs.44898 AA418564
3355	G_1580495	0.82256	0.2	0.846525		310176 FLJ31952 hypothetical protein FLJ31952 Hs.193490 AA969331 146857
1793	G_47900	-0.42166	-0.73333	0.845914		114960 IFNGR1 interferon gamma receptor 1 Hs.180866 H11482 interferon-gamma receptor alpha chain 3459
1620	G_810727	-0.59565	-0.6	0.845458		107331 Homo sapiens mRNA; cDNA DKFZp564B076 (from clone DKFZp564B076) Hs.21103 AA457718
5085	G_2043415	-0.66899	-0.51667	0.845278		310361 DAPK1 death-associated protein kinase 1 Hs.153924 AI371096 1612
3425	G_705064	0.47352	0.7	0.845116		109733 TACC3 transforming, acidic coiled-coil containing protein 3 Hs.104019 AA279990 JkR1 mRNA downregulated upon T-cell activation 10460
4675	G_1011266	-0.65534	-0.53333	0.844933		107326 ESTs Hs.377510 AA229275
4381	G_122059	0.57728	0.61667	0.844709		310471 EST Hs.379945 T98389
4921	G_592594	-0.38842	-0.75	0.844612		113367 LRIG1 leucine-rich repeats and immunoglobulin-like domains 1 Hs.4193 AA159578 26018
4385	G_80221	0.8434	0.03333	0.844058		102588 CPA3 carboxypeptidase A3 (mast cell) Hs.646 T64223 1359
1669	G_773337	-0.64019	-0.55	0.844004		220581 Homo sapiens cDNA: FLJ21409 fis, clone COL03924 Hs.172129 AA425438
182	G_1031698	-0.62513	-0.56667	0.843743		110521 LOC96626 pinch-2 Hs.285130 AA609556 96626
1428	G_429678	-0.51535	-0.66667	0.842635		109477 SLC11A3 solute carrier family 11 (proton-coupled divalent metal ion transporters), member 3 Hs.5944 AA011593 30061
3077	G_795561	0.75025	0.38333	0.842506		100117 FLJ10852 hypothetical protein similar to ankyrin repeat-containing priotein AKR1 Hs.95744 AA459681 54503
4770	G_417226	-0.72218	-0.43333	0.842211		101953 MYC v-myc myelocytomatosis viral oncogene homolog (avian) Hs.79070 W87741 c-myc 4609
2686	G_754312	-0.71181	-0.45	0.842124		110070 WDR9 **WD repeat domain 9 Hs.225674 AA479503 54014
98	G_277596	-0.63746	-0.55	0.841935		120177 N57002
931	G_855079	0.68891	0.48333	0.841549		224786 ZNF185 zinc finger protein 185 (LIM domain) Hs.16622 AA630138 7739
3534	G_1027283	-0.66416	-0.51667	0.841461		225493 ESTs Hs.112532 AA600238
2773	G_2028916	-0.57029	-0.61667	0.839948		309944 MOB mob protein Hs.153716 AI261602 259230
3434	G_292936	0.68685	0.48333	0.839864		99561 FLJ10468 hypothetical protein FLJ10468 Hs.48855 N63744 55143
4548	G_1560578	-0.58636	-0.6	0.838939		312613 NCOA2 nuclear receptor coactivator 2 Hs.29131 AA947176 10499
1524	G_2253630	-0.71751	-0.43333	0.83821		319290 NEFH neurofilament, heavy polypeptide 200kDa Hs.198760 AI686398 4744
4051	G_1873834	0.43405	0.71667	0.837864		310468 RRAS related RAS viral (r-ras) oncogene homolog Hs.9651 AI368184 6237
1448	G_915177	-0.63136	-0.55	0.837326		106113 AA579371
2357	G_48801	-0.56533	-0.61667	0.836588		111718 Homo sapiens mRNA; cDNA DKFZp434G012 (from clone DKFZp434G012) Hs.303154 H14810
544	G_471642	-0.54658	-0.63333	0.836574		119498 LAMA2 **laminin, alpha 2 (merosin, congenital muscular dystrophy) Hs.75279 AA034938 3908
4719	G_485738	-0.59894	-0.58333	0.836064		100273 DEGS degenerative spermatocyte homolog, lipid desaturase (Drosophila) Hs.185973 AA039929 8560
1964	G_814798	-0.6818	-0.48333	0.835739		119033 ALDH1A3 aldehyde dehydrogenase 1 family, member A3 Hs.75746 AA455235 220
1215	G_325375	-0.56379	-0.61667	0.835548		118680 Homo sapiens cDNA FLJ20767 fis, clone COL06986 Hs.24192 W52186
1050	G_265868	-0.59811	-0.58333	0.83547		225926 SSPN sarcospan (Kras oncogene-associated gene) Hs.183428 N21470 8082
3461	G_809603	0.5808	0.6	0.835062		104504 PTMA **prothymosin, alpha (gene sequence 28) Hs.250655 AA442991 5757
4285	G_840687	0.75021	0.36667	0.835022		110473 MUC1 mucin 1, transmembrane Hs.89603 AA486365 4582
865	G_784276	0.80163	0.23333	0.834897		98599 ARG99 ARG99 protein Hs.28229 AA447479 83857
404	G_1536240	-0.4796	-0.68333	0.834839		220752 HPS3 Hermansky-Pudlak syndrome 3 Hs.282804 AA918982 84343
5084	G_364934	-0.64219	-0.53333	0.834775		102224 DAPK1 death-associated protein kinase 1 Hs.153924 AA024655 DAP-kinase 1612
757	G_429042	-0.45477	-0.7	0.834755		117659 THBS1 thrombospondin 1 Hs.87409 AA007557 7057
4914	G_811582	-0.64175	-0.53333	0.834436		117408 GOLPH2 golgi phosphoprotein 2 Hs.182793 AA454597 51280
4485	G_309929	-0.54281	-0.63333	0.834116		103651 GPR putative G protein coupled receptor Hs.37196 N95435 11245
755	G_310406	-0.4263	-0.71667	0.833875		113708 IL6 interleukin 6 (interferon, beta 2) Hs.93913 N98591 IL-6 3569
4978	G_511233	-0.76425	-0.33333	0.833779		105129 TMEPAI transmembrane, prostate androgen induced RNA Hs.83883 AA088701 56937
467	G_471641	0.66596	0.5	0.832768		109538 RODH 3-hydroxysteroid epimerase Hs.11958 AA034944 8630
4716	G_700500	-0.39414	-0.73333	0.832538		223881 PCTK2 PCTAIRE protein kinase 2 Hs.183302 AA291069 5128
2857	G_753775	-0.55898	-0.61667	0.83231		103684 GMPR guanosine monophosphate reductase Hs.1435 AA406242 2766
2416	G_194804	-0.51972	-0.65	0.832231		113143 PITPN phosphotidylinositol transfer protein Hs.79709 R89807 5306
1328	G_471707	-0.74709	-0.36667	0.83222		222587 CAP2 adenylyl cyclase-associated protein 2 Hs.296341 AA035071 10486
1824	G_897760	-0.47405	-0.68333	0.831663		315474 LAMC1 laminin, gamma 1 (formerly LAMB2) Hs.214982 AA599005 3915
2438	G_784100	-0.65161	-0.51667	0.831591		119719 LIM LIM protein (similar to rat protein kinase C-binding enigma) Hs.154103 AA443846 10611
156	G_412967	-0.66419	-0.5	0.831353		225514 MLF1 myeloid leukemia factor 1 Hs.85195 AA707847 4291
3459	G_1839367	0.62174	0.55	0.830097		307606 PIR51 RAD51-interacting protein Hs.24596 AI214426 10635
4562	G_22355	-0.53622	-0.63333	0.829843		119255 RGS4 regulator of G-protein signalling 4 Hs.227571 T74284 5999
539	G_1527066	-0.49356	-0.66667	0.829488		220758 EBF early B-cell factor Hs.32425 AA917497 1879
1965	G_416833	-0.6197	-0.55	0.82857		103825 FKBP5 FK506 binding protein 5 Hs.7557 W86653 2289
2826	G_1915627	-0.73424	-0.38333	0.828282		313144 PART1 prostate androgen-regulated transcript 1 Hs.96744 AI311391 25859
2980	G_277173	-0.69536	-0.45	0.828267		121152 PPP1R1B protein phosphatase 1, regulatory (inhibitor) subunit 1B (dopamine and cAMP regulated phosphoprotein, DARPP-32) Hs.286192 N34316 84152
1555	G_1635983	0.51238	0.65	0.827667		314382 AI017808
1815	G_186132	-0.63183	-0.53333	0.826831		112303 SELE selectin E (endothelial adhesion molecule 1) Hs.89546 H39560 ELAM1=endothelial leukocyte adhesion molecule I 6401
2717	G_451911	-0.74099	-0.36667	0.826748		222890 SEMA4G sema domain, immunoglobulin domain (Ig), transmembrane domain (TM) and short cytoplasmic domain, (semaphorin) 4G Hs.169549 AA706969 57715
4925	G_1668067	-0.69349	-0.45	0.826697		316428 DKFZP434D146 DKFZP434D146 protein Hs.240845 AI042352 26084
1336	G_841149	-0.63112	-0.53333	0.826289		103449 TGFBR2 transforming growth factor, beta receptor II (70/80kDa) Hs.82028 AA487034 Transforming growth factor, beta receptor II (70-80kD) 7048
1962	G_1574642	-0.65776	-0.5	0.826225		307712 Homo sapiens cDNA FLJ13752 fis, clone PLACE3000352 Hs.144871 AA968971
717	G_526657	-0.54977	-0.61667	0.826153		109699 TCEB3 transcription elongation factor B (SIII), polypeptide 3 (110kDa, elongin A) Hs.155202 AA128607 6924
2262	G_1599489	-0.66075	-0.49583	0.826098		224465 HRIHFB2072 short coiled-coil protein Hs.286013 AA961361 60592
1454	G_1912786	-0.63084	-0.53333	0.826075		98698 Homo sapiens cDNA FLJ31775 fis, clone NT2RI2008115 Hs.349227 AI304356
486	G_854897	-0.71329	-0.41667	0.826073		225433 Homo sapiens, similar to Y43E12A.2.p, clone MGC:33537 IMAGE:4821347, mRNA, complete cds Hs.28264 AA630373
370	G_727147	0.71318	0.41667	0.825978		120413 SERPINB3 serine (or cysteine) proteinase inhibitor, clade B (ovalbumin), member 3 Hs.227948 AA292860 6317
4857	G_771053	-0.71312	-0.41667	0.825926		105431 ZBRK1 zinc-finger protein ZBRK1 Hs.130965 AA427528 59348
3551	G_740888	0.46296	0.68333	0.825392		105525 KRT8 keratin 8 Hs.242463 AA477481 3856
497	G_301068	-0.65608	-0.5	0.824888		112794 AASS aminoadipate-semialdehyde synthase Hs.184168 N81025 10157
3410	G_1468466	0.73838	0.36667	0.82441		224154 Homo sapiens cDNA FLJ11381 fis, clone HEMBA1000501 Hs.127797 AA885096
1485	G_813179	-0.50665	-0.65	0.824132		98934 IGF1 insulin-like growth factor 1 (somatomedin C) Hs.85112 AA456321 3479
2807	G_842762	-0.6792	-0.46667	0.824071		105371 OSBPL10 oxysterol binding protein-like 10 Hs.321622 AA486183 114884
471	G_2273717	-0.54652	-0.61667	0.823994		311199 NAV3 neuron navigator 3 Hs.174188 AI613003 89795
5062	G_213651	0.67909	0.46667	0.823981		101323 ENC1 ectodermal-neural cortex (with BTB-like domain) Hs.104925 H72122 8507
3329	G_1942029	0.45952	0.68333	0.823467		318244 Homo sapiens cDNA FLJ40641 fis, clone THYMU2016968, highly similar to DIACYLGLYCEROL KINASE, ZETA (EC 2.7.1.107) Hs.303861 AI206296
1226	G_279800	-0.50415	-0.65	0.822598		220539 SLMAP sarcolemma associated protein Hs.4007 N49107 7871
4866	G_1090281	-0.63936	-0.51667	0.822027		103848 FLJ13409 hypothetical protein FLJ13409 Hs.30732 AA584428 79670
5107	G_261253	-0.52372	-0.63333	0.821821		99879 ESTs Hs.23762 H98248
1933	G_126858	-0.61057	-0.55	0.821764		103312 SOAT1 sterol O-acyltransferase (acyl-Coenzyme A: cholesterol acyltransferase) 1 Hs.14553 R07295 6646
4828	G_1034625	-0.72646	-0.38333	0.821393		221792 Homo sapiens cDNA FLJ31439 fis, clone NT2NE2000707 Hs.349656 AA779835
1279	G_202658	-0.70754	-0.41667	0.821113		117621 TRPS1 trichorhinophalangeal syndrome I Hs.26102 H53479 7227
2601	G_823655	-0.60932	-0.55	0.820835		220332 LOC51313 AD021 protein Hs.323583 AA490585 51313
1289	G_209137	-0.55988	-0.6	0.82065		108211 GABRE gamma-aminobutyric acid (GABA) A receptor, epsilon Hs.22785 H63532 2564
4065	G_1642145	0.36804	0.73333	0.820504		225786 KIAA1034 KIAA1034 protein Hs.12896 AI023265 23314
594	G_1523530	-0.5216	-0.63333	0.820471		311684 PTPRC protein tyrosine phosphatase, receptor type, C Hs.170121 AA904360 5788
1211	G_839736	-0.54119	-0.61667	0.820468		118867 CRYAB crystallin, alpha B Hs.1940 AA504891 1410
1613	G_884663	0.36711	0.73333	0.820087		224550 HDAC9 histone deacetylase 9 Hs.116753 AA629911 9734
1181	G_162310	-0.47732	-0.66667	0.819929		224197 PMP22 peripheral myelin protein 22 Hs.103724 H26086 5376
3250	G_364302	0.52027	0.63333	0.819627		104291 NFIA nuclear factor I/A Hs.173933 AA022462 4774
4052	G_744047	0.53963	0.61667	0.81944		111792 PLK polo-like kinase (Drosophila) Hs.77597 AA629262 5347
4707	G_396350	-0.59164	-0.56667	0.819239		221427 ESTs Hs.296095 AA758375
4734	G_52730	-0.49712	-0.65	0.818308		104572 LOC131034 **copine-like protein Hs.7130 H29499 131034
2681	G_346915	-0.556	-0.6	0.818007		225898 ESTs Hs.22380 W79122
2708	G_1540513	-0.4496	-0.68333	0.817973		226942 BCAA RBP1-like protein Hs.17428 AA907555 51742
3227	G_506128	-0.68229	-0.45	0.817325		220969 Homo sapiens cDNA FLJ13603 fis, clone PLACE1010270 Hs.25252 AA708864
5061	G_250869	0.76018	0.3	0.817235		225012 Homo sapiens mRNA full length insert cDNA clone EUROIMAGE 1977059 Hs.351928 N23605
1299	G_853367	-0.39249	-0.71667	0.817107		223884 ESTs Hs.374574 AA663309
2694	G_151477	-0.55452	-0.6	0.817002		98814 LOC51159 colon carcinoma related protein Hs.30343 H02837 51159
5044	G_594946	-0.64604	-0.5	0.816926		104147 PHCA phytoceramidase, alkaline Hs.23862 AA172039 55331
380	G_1457276	-0.57155	-0.58333	0.816666		226507 Homo sapiens cDNA: FLJ22182 fis, clone HRC00953 Hs.288660 AA911832
32	G_842939	-0.64569	-0.5	0.816649		107073 ADARB1 adenosine deaminase, RNA-specific, B1 (RED1 homolog rat) Hs.85302 AA489331 104
4774	G_71977	-0.72028	-0.38333	0.815932		108077 DDX36 DEAD/H (Asp-Glu-Ala-Asp/His) box polypeptide 36 Hs.9414 T52311 170506
3307	G_488555	0.51389	0.63333	0.815592		104942 **Homo sapiens, clone IMAGE:4510900, mRNA, partial cds Hs.379564 AA047136
782	G_757873	-0.57001	-0.58333	0.815589		98342 CDK5R1 cyclin-dependent kinase 5, regulatory subunit 1 (p35) Hs.93597 AA442853 Cyclin-dependent kinase 5, regulatory subunit 8851
4454	G_838732	-0.60185	-0.55	0.815306		101877 Homo sapiens cDNA FLJ35016 fis, clone OCBBF2014292 Hs.379757 AA457543
2080	G_813621	-0.56883	-0.58333	0.814765		100848 CGI-127 yippee protein Hs.184542 AA447696 51646
1169	G_2577002	-0.53225	-0.61667	0.814599		330706 FHL1 four and a half LIM domains 1 Hs.239069 AW075510 2273
1316	G_785530	-0.44333	-0.68333	0.814544		315510 ITGA1 integrin, alpha 1 Hs.116774 AA450323 3672
690	G_1628121	-0.6552	-0.48333	0.814184		316581 ESTs Hs.129489 AA994330
4945	G_810703	-0.64165	-0.5	0.813458		119368 HDLBP **high density lipoprotein binding protein (vigilin) Hs.177516 AA457697 3069
376	G_1031919	0.71658	0.38333	0.812668		106141 ESTs, Weakly similar to retinal short-chain dehydrogenase/reductase retSDR2 [Homo sapiens] [H.sapiens] Hs.356086 AA609749
206	G_1670291	-0.46426	-0.66667	0.812395		311581 OSBPL6 oxysterol binding protein-like 6 Hs.318775 AI094626 114880
2522	G_2014138	-0.5652	-0.58333	0.812235		307845 FACL2 fatty-acid-Coenzyme A ligase, long-chain 2 Hs.154890 AI361530 2180
3481	G_346134	0.61176	0.53333	0.811598		111918 CARHSP1 calcium regulated heat stable protein 1, 24kDa Hs.92198 W72753 23589
4151	G_701766	-0.52725	-0.61667	0.811341		186303 Homo sapiens cDNA FLJ12727 fis, clone NT2RP2000027 Hs.96557 AA284416 Unknown sc_id1983
627	G_504226	-0.38028	-0.71667	0.811313		102472 CD53 CD53 antigen Hs.82212 AA132090 CD53 963
955	G_1324446	-0.58047	-0.56667	0.811209		113008 EVA1 epithelial V-like antigen 1 Hs.116651 AA768426 10205
3711	G_1861180	0.43681	0.68333	0.811013		112838 TCOF1 Treacher Collins-Franceschetti syndrome 1 Hs.301266 AI144067 6949
310	G_810873	0.75344	0.3	0.81097		114678 SCNN1A sodium channel, nonvoltage-gated 1 alpha Hs.2794 AA458982 6337
4864	G_795555	-0.61077	-0.53333	0.810852		102266 FLJ13409 hypothetical protein FLJ13409 Hs.30732 AA459679 79670
1858	G_566368	-0.59579	-0.55	0.810843		112095 EHF ets homologous factor Hs.182339 AA149006 26298
3075	G_215000	0.46145	0.66667	0.810793		105603 VIPR1 vasoactive intestinal peptide receptor 1 Hs.348500 H73241 7433
2418	G_384999	-0.56276	-0.58333	0.810539		221143 HBP1 HMG-box containing protein 1 Hs.10882 AA709142 26959
3426	G_244767	0.53976	0.60417	0.810162		98883 KIAA0074 KIAA0074 protein Hs.1192 N54344 23397
4698	G_725117	-0.50484	-0.63333	0.80992		226538 ASTN2 astrotactin 2 Hs.30898 AA404602 23245
4390	G_1558268	0.77544	0.23333	0.809784		119579 ESTs Hs.356479 AA975820
210	G_361028	-0.60922	-0.53333	0.809685		311346 SUPT3H suppressor of Ty 3 homolog (S. cerevisiae) Hs.380844 AA013171 8464
1102	G_377346	-0.50444	-0.63333	0.809671		100666 C1S complement component 1, s subcomponent Hs.169756 AA055520 716
4339	G_365763	0.405	0.7	0.808718		100574 HR hairless Hs.272367 AA025648 55806
1946	G_785938	-0.62089	-0.51667	0.807745		308441 Homo sapiens cDNA FLJ14237 fis, clone NT2RP4000517 Hs.165195 AA448561
4846	G_39821	-0.53904	-0.6	0.806576		120614 ABCA5 ATP-binding cassette, sub-family A (ABC1), member 5 Hs.180513 R53427 23461
4249	G_384064	-0.72638	-0.35	0.806305		178465 FGF12 fibroblast growth factor 12 Hs.343809 AA702307 FGF-12=Fibroblast growth factor-12 2257
4884	G_744944	-0.66869	-0.45	0.806006		100493 MYO6 myosin VI Hs.22564 AA625890 4646
559	G_855610	-0.55584	-0.58333	0.805749		226737 KIAA1029 synaptopodin Hs.5307 AA664237 11346
818	G_774751	-0.53778	-0.6	0.805734		108751 NEDD4 neural precursor cell expressed, developmentally down-regulated 4 Hs.1565 AA442095 4734
2722	G_243549	-0.55549	-0.58333	0.805508		108768 MYB v-myb myeloblastosis viral oncogene homolog (avian) Hs.1334 N49284 4602
3417	G_842968	0.65651	0.46667	0.805473		105226 BUB1B BUB1 budding uninhibited by benzimidazoles 1 homolog beta (yeast) Hs.36708 AA488324 701
4549	G_145284	-0.49759	-0.63333	0.805421		102512 NCOA2 nuclear receptor coactivator 2 Hs.29131 R77770 10499
2215	G_1069978	-0.45159	-0.66667	0.805222		117539 KIAA0697 KIAA0697 protein Hs.12329 AA599689 26057
922	G_293835	-0.47516	-0.65	0.805157		117032 ESTs, Weakly similar to hypothetical protein FLJ20294 [Homo sapiens] [H.sapiens] Hs.293967 N65995
5046	G_305809	-0.49634	-0.63333	0.804649		113771 PHCA phytoceramidase, alkaline Hs.23862 N90051 55331
1095	G_85634	-0.42289	-0.68333	0.803602		115931 C1S complement component 1, s subcomponent Hs.169756 T62048 716
2862	G_1601979	-0.3933	-0.7	0.802923		306956 EPHX1 epoxide hydrolase 1, microsomal (xenobiotic) Hs.89649 AI002433 2052
4786	G_826335	-0.79432	-0.11667	0.802843		185134 ESTs, Weakly similar to A46506 leukocyte activation antigen M6 - human [H.sapiens] Hs.356113 AA521108 glycogenin-2 like mRNA
4888	G_824588	-0.53249	-0.6	0.802213		162245 FLJ32203 hypothetical protein FLJ32203 Hs.351706 AA490985 Unknown 130557
285	G_1587710	-0.6273	-0.5	0.802188		310434 PER1 period homolog 1 (Drosophila) Hs.68398 AA975430 5187
2828	G_1928791	-0.53213	-0.6	0.801974		308977 F3 coagulation factor III (thromboplastin, tissue factor) Hs.62192 AI313387 2152
2083	G_52933	-0.59893	-0.53333	0.801971		101636 LIV-1 LIV-1 protein, estrogen regulated Hs.79136 H29315 25800
3311	G_293032	0.53185	0.6	0.801788		105977 TFAP2A transcription factor AP-2 alpha (activating enhancer binding protein 2 alpha) Hs.334334 N63770 AP-2 transcription factor 7020
708	G_487287	-0.49157	-0.63333	0.801716		223989 RGC32 RGC32 protein Hs.76640 AA040567 28984
2750	G_263229	-0.4453	-0.66667	0.801711		105015 LAF4 lymphoid nuclear protein related to AF4 Hs.38070 H99588 3899
145	G_755301	-0.53138	-0.6	0.801477		100450 PRKCD protein kinase C, delta Hs.155342 AA496360 5580
3041	G_83358	-0.72079	-0.35	0.801273		120975 ESTs Hs.76704 T68445
725	G_753104	-0.54817	-0.58333	0.800478		102299 DCT **dopachrome tautomerase (dopachrome delta-isomerase, tyrosine-related protein 2) Hs.301865 AA478553 1638
1243	G_784772	-0.66181	-0.45	0.800308		101310 AKAP12 A kinase (PRKA) anchor protein (gravin) 12 Hs.788 AA478542 9590
5008	G_447715	-0.67223	-0.43333	0.799793		220333 H4FH H4 histone family, member H Hs.93758 AA702781 8365
4018	G_713213	0.52847	0.6	0.79955		106370 SPPL2B SPPL2b Hs.284161 AA282835 fos39554_1 predicted protein from fosmid 39554 56928
4814	G_144834	-0.57968	-0.55	0.79908		100562 MAP7 microtubule-associated protein 7 Hs.146388 R77251 9053
189	G_511832	0.46456	0.65	0.798947		102205 PPARG peroxisome proliferative activated receptor, gamma Hs.100724 AA088420 5468
1966	G_1472847	-0.54583	-0.58333	0.798877		109340 FKBP5 **FK506 binding protein 5 Hs.7557 AA872767 2289
715	G_811028	-0.41338	-0.68333	0.798638		111770 ESTs Hs.374415 AA485373
1700	G_322643	-0.54506	-0.58333	0.798351		103086 SQRDL sulfide dehydrogenase like (yeast) Hs.8185 W15319 58472
580	G_1967131	-0.46328	-0.65	0.798203		319467 DKFZP586D0824 DKFZP586D0824 protein Hs.128797 AI246316 26157
31	G_509589	0.22076	0.76667	0.797821		117028 Homo sapiens cDNA FLJ30661 fis, clone DFNES2000526 Hs.265540 AA045595
3253	G_134520	0.54373	0.58333	0.797444		104139 HAK heart alpha-kinase Hs.55950 R27572 115701
2992	G_244307	-0.46129	-0.65	0.79705		99906 SERPINE1 serine (or cysteine) proteinase inhibitor, clade E (nexin, plasminogen activator inhibitor type 1), member 1 Hs.82085 N54794 5054
4165	G_684090	0.45955	0.65	0.796044		162264 ESTs Hs.24416 AA251129 Unknown UG Hs.24416 ESTs
954	G_81409	-0.64475	-0.46667	0.795917		115404 GABARAPL1 GABA(A) receptor-associated protein like 1 Hs.336429 T60160 23710
2081	G_361922	-0.57409	-0.55	0.795034		109113 ZMPSTE24 zinc metalloproteinase (STE24 homolog, yeast) Hs.25846 AA001403 10269
3208	G_2028722	0.57388	0.55	0.794883		308692 OSF-2 osteoblast specific factor 2 (fasciclin I-like) Hs.136348 AI262129 10631
1621	G_324951	0.4573	0.65	0.794747		110318 CKTSF1B1 cysteine knot superfamily 1, BMP antagonist 1 Hs.40098 W48619 26585
2517	G_2515861	-0.68635	-0.4	0.794403		330451 ELL2 ELL-related RNA polymerase II, elongation factor Hs.98124 AI979290 22936
3168	G_207826	0.7208	0.33333	0.794142		107960 P311 P311 protein Hs.142827 H60254 9315
5091	G_428733	-0.40422	-0.68333	0.793936		161377 PRKCD protein kinase C, delta Hs.155342 AA005214 PKC delta=Protein kinase C, delta 5580
1833	G_361611	-0.60273	-0.51667	0.793871		311498 TOB1 transducer of ERBB2, 1 Hs.178137 W96163 10140
1672	G_138117	-0.40371	-0.68333	0.793676		316903 RPL17 ribosomal protein L17 Hs.82202 R53793 6139
2439	G_1696757	-0.58768	-0.53333	0.793605		313178 KIAA1165 likely ortholog of mouse Nedd4 WW domain-binding protein 5A Hs.30340 AI095572 54602
742	G_1471826	-0.47799	-0.63333	0.793462		99874 AA873341
2707	G_1534700	-0.57064	-0.55	0.792547		308186 KIAA0830 KIAA0830 protein Hs.167115 AA918646 23052
1583	G_196005	-0.67361	-0.41667	0.792063	AQP3	120491 AQP3 aquaporin 3 Hs.234642 R91904 360
1566	G_971372	0.75628	0.23333	0.791456		115550 NPTX2 neuronal pentraxin II Hs.3281 AA683041 4885
1596	G_328868	-0.56857	-0.55	0.791057		106958 CD44 CD44 antigen (homing function and Indian blood group system) Hs.169610 W40475 960
4314	G_82879	0.67237	0.41667	0.791009		118656 MBL2 mannose-binding lectin (protein C) 2, soluble (opsonic defect) Hs.2314 T69284 4153
2154	G_137236	-0.63799	-0.46667	0.790451		101575 KIAA0970 KIAA0970 protein Hs.103329 R36149 22862
3965	G_868530	0.58279	0.53333	0.789991		220695 calmin calponin like transmembrane domain protein Hs.118164 AA775028 79789
4729	G_1034524	-0.63731	-0.46667	0.789902		224532 FLJ13590 hypothetical protein FLJ13590 Hs.183390 AA779758 79898
2784	G_853809	-0.47166	-0.63333	0.789665		100957 RGS5 regulator of G-protein signalling 5 Hs.24950 AA668470 8490
586	G_293925	-0.39563	-0.68333	0.789597		116933 LYZ lysozyme (renal amyloidosis) Hs.234734 N63943 MIR-7=monocyte/macrophage Ig-related receptor AND RAD23=UV e 4069
945	G_345447	0.59643	0.51667	0.789099		226451 PCDH18 protocadherin 18 Hs.97266 W72511 54510
2037	G_2569190	-0.56508	-0.55	0.788553		330679 FSTL1 follistatin-like 1 Hs.296267 AW073393 11167
592	G_1552481	-0.44425	-0.65	0.787311		226738 LCP2 lymphocyte cytosolic protein 2 (SH2 domain containing leukocyte protein of 76kDa) Hs.2488 AA927372 3937
4726	G_453276	-0.65727	-0.43333	0.78726		224955 CGN cingulin Hs.18376 AA778796 57530
2208	G_32587	-0.48934	-0.61667	0.787233		112563 NAPG N-ethylmaleimide-sensitive factor attachment protein, gamma Hs.7181 R20261 8774
1867	G_629642	-0.46718	-0.63333	0.786997		109376 WDR7 WD repeat domain 7 Hs.10881 AA218543 23335
4827	G_811066	-0.528	-0.58333	0.786802		106695 SBB103 hypothetical SBBI03 protein Hs.153639 AA485443 10193
2833	G_1677546	-0.46655	-0.63333	0.786623		318222 EST Hs.135448 AI078552
3440	G_782259	0.56202	0.55	0.786363		101617 FLJ23468 hypothetical protein FLJ23468 Hs.38178 AA431741 79682
4709	G_52002	-0.63272	-0.46667	0.786203		226865 **Homo sapiens cDNA FLJ30915 fis, clone FEBRA2006370 Hs.351210 H23519
1121	G_1475803	-0.54488	-0.56667	0.786136		307888 COX7A1 cytochrome c oxidase subunit VIIa polypeptide 1 (muscle) Hs.114346 AA872125 1346
4526	G_362059	-0.56108	-0.55	0.785691		102913 LAMA3 laminin, alpha 3 Hs.83450 AA001431 3909
262	G_796645	0.64371	0.45	0.785406		113130 ESTs Hs.99542 AA461474
5110	G_754591	-0.52519	-0.58333	0.784919		120268 DKFZP566B0846 nectin 3 Hs.21201 AA406320 25945
2580	G_195397	-0.59065	-0.51667	0.784739		320036 IMPACT hypothetical protein IMPACT Hs.284245 R88918 55364
2079	G_841067	-0.54236	-0.56667	0.784391		99455 LOC136319 granule cell differentiation protein Hs.21321 AA486770 136319
5152	G_2402904	-0.48443	-0.61667	0.78419		330692 LIMS1 LIM and senescent cell antigen-like domains 1 Hs.112378 AI862555 3987
3460	G_512410	0.55863	0.55	0.783944		225951 RNASEH2A ribonuclease H2, large subunit Hs.25292 AA057723 10535
3431	G_725454	0.54088	0.56667	0.783368		114475 CKS2 CDC28 protein kinase 2 Hs.83758 AA292964 1164
2228	G_1422894	-0.57355	-0.53333	0.783199		308636 NOTCH2 Notch homolog 2 (Drosophila) Hs.8121 AA827551 4853
413	G_592778	0.68268	0.38333	0.782939		120457 DKFZp434G0522 hypothetical protein DKFZp434G0522 Hs.67991 AA158211 54758
2632	G_209758	-0.58824	-0.51667	0.782927		109890 MME membrane metallo-endopeptidase (neutral endopeptidase, enkephalinase, CALLA, CD10) Hs.1298 H65597 CD10=CALLA=Neprilysin=enkepalinase 4311
3042	G_2250839	-0.69168	-0.36667	0.782859		228995 AR androgen receptor (dihydrotestosterone receptor; testicular feminization; spinal and bulbar muscular atrophy; Kennedy disease) Hs.99915 AI659563 367
4917	G_281003	-0.69799	-0.35417	0.782705		109425 TRG@ T cell receptor gamma locus Hs.112259 N50880 6965
2842	G_511778	-0.57245	-0.53333	0.782394		106197 TM4SF1 transmembrane 4 superfamily member 1 Hs.351316 AA088439 4071
47	G_327250	-0.63975	-0.45	0.782164		112100 ESTs Hs.8053 W02067
4408	G_325674	0.78042	0.05	0.78202		113175 BOK **BCL2-related ovarian killer Hs.293753 W51835 666
4584	G_365738	-0.57159	-0.53333	0.781765		99068 FLJ21159 hypothetical protein FLJ21159 Hs.61271 AA025538 79884
842	G_841349	0.68087	0.38333	0.781362		310998 Homo sapiens mRNA; cDNA DKFZp667P166 (from clone DKFZp667P166) Hs.194024 AA487449
300	G_48614	0.67951	0.38333	0.780177		110954 ELF4 E74-like factor 4 (ets domain transcription factor) Hs.151139 H14359 2000
1466	G_714213	-0.6123	-0.48333	0.780076		117538 TNFRSF6 tumor necrosis factor receptor superfamily, member 6 Hs.82359 AA293570 355
4513	G_357778	-0.569	-0.53333	0.779873		108178 MGC29667 hypothetical protein MGC29667 Hs.350558 W95428 143686
3249	G_2019469	0.51726	0.58333	0.779636		309014 CKMT1 creatine kinase, mitochondrial 1 (ubiquitous) Hs.153998 AI369378 1159
779	G_51448	-0.40356	-0.66667	0.779301		109885 ATF3 activating transcription factor 3 Hs.460 H21041 ATF-3=activating transcription factor 3 467
2257	G_270620	-0.55194	-0.55	0.77919		225037 KIAA1458 KIAA1458 protein Hs.27263 N29576 57606
5086	G_271130	-0.53423	-0.56667	0.778792		109208 ESTs, Weakly similar to hypothetical protein FLJ20489 [Homo sapiens] [H.sapiens] Hs.16954 N34470
4904	G_283173	-0.64647	-0.43333	0.778266		221393 Homo sapiens, clone MGC:17787 IMAGE:3885428, mRNA, complete cds Hs.17719 N45236
3432	G_359119	0.56595	0.53333	0.77765		102513 CKS2 CDC28 protein kinase 2 Hs.83758 AA010065 ckshs2=homolog of Cks1=p34Cdc28/Cdc2-associated protein 1164
5153	G_825416	-0.53187	-0.56667	0.777175		98440 LIMS1 LIM and senescent cell antigen-like domains 1 Hs.112378 AA504265 3987
227	G_810224	0.45039	0.63333	0.777147		119111 DKFZp564I1922 adlican Hs.72157 AA464691 25878
1984	G_376785	-0.56501	-0.53333	0.776967		107508 PGRMC2 progesterone receptor membrane component 2 Hs.9071 AA047567 10424
2455	G_1554796	-0.53122	-0.56667	0.77673		315713 Homo sapiens mRNA for OK/KNS-CL.3, complete cds Hs.179246 AA913079
388	G_753301	0.56396	0.53333	0.776203		104008 CEACAM1 carcinoembryonic antigen-related cell adhesion molecule 1 (biliary glycoprotein) Hs.50964 AA406571 634
1790	G_239889	-0.54762	-0.55	0.776136		119540 ANKH ankylosis, progressive homolog (mouse) Hs.168640 H81907 56172
2952	G_137793	0.57917	0.51667	0.776135		115885 Homo sapiens cDNA FLJ30718 fis, clone FCBBF2001675 Hs.17962 R68243
1788	G_47074	-0.36798	-0.68333	0.776112		100828 ANKH **ankylosis, progressive homolog (mouse) Hs.168640 H10416 56172
1856	G_753633	-0.56362	-0.53333	0.775956		110436 KIAA0854 KIAA0854 protein Hs.30209 AA478596 22882
1586	G_2251833	-0.36757	-0.68333	0.775917		311087 MSMB microseminoprotein, beta- Hs.183752 AI658727 4477
3682	G_2027952	0.47045	0.61667	0.775632		310503 FLJ20297 hypothetical protein FLJ20297 Hs.94491 AI356275 55627
4812	G_376764	-0.72808	-0.26667	0.77538		111727 UTRN utrophin (homologous to dystrophin) Hs.286161 AA046146 7402
241	G_1878930	-0.57765	-0.51667	0.775002		313761 Homo sapiens cDNA FLJ33993 fis, clone DFNES2007757 Hs.59962 AI278202
2581	G_79598	-0.57677	-0.51667	0.774346		308865 CDH1 cadherin 1, type 1, E-cadherin (epithelial) Hs.194657 T62718 999
4247	G_1605250	0.65268	0.41667	0.774342		107142 ESTs Hs.166313 AA995972
2410	G_648011	-0.5088	-0.58333	0.774049		111550 NDRG3 NDRG family member 3 Hs.355855 AA204743 57446
3360	G_856958	0.61753	0.46667	0.774031		221113 ESTs Hs.120860 AA669669
4830	G_460435	-0.73791	-0.23333	0.773921		221982 ESTs Hs.117067 AA677561
2045	G_1256714	-0.46737	-0.61667	0.773768		224857 C21orf4 chromosome 21 open reading frame 4 Hs.284142 AA876148 757
199	G_269411	0.54404	0.55	0.773615		99038 Homo sapiens mRNA; cDNA DKFZp686H157 (from clone DKFZp686H157) Hs.90424 N26163
2566	G_782047	-0.56017	-0.53333	0.773454		104600 KIAA0268 KIAA0268 protein Hs.241552 AA429602 23124
4198	G_1682756	0.68973	0.35	0.773452		315924 EST Hs.377140 AI168124
2511	G_33915	-0.41912	-0.65	0.773409		227069 SPAG9 sperm associated antigen 9 Hs.129872 R23524 9043
4929	G_49394	-0.64021	-0.43333	0.773074		227070 **ESTs Hs.377585 H15654
4871	G_1881251	-0.57468	-0.51667	0.77279		317770 BICD1 Bicaudal D homolog 1 (Drosophila) Hs.164975 AI305269 636
3272	G_824847	0.36019	0.68333	0.772449		185454 SDCCAG28 **serologically defined colon cancer antigen 28 Hs.84700 AA488866 Unknown 10809
1366	G_69378	-0.67015	-0.38333	0.772038		108730 Homo sapiens cDNA: FLJ23165 fis, clone LNG09846 Hs.279898 T58652
810	G_123425	-0.41622	-0.65	0.771841		106328 Homo sapiens cDNA FLJ39225 fis, clone OCBBF2007224, highly similar to Homo sapiens candidate tumor suppressor protein DICE1 mRNA Hs.15282 T99650
1447	G_1877592	-0.62693	-0.45	0.771713		319147 TRPS1 trichorhinophalangeal syndrome I Hs.26102 AI276654 7227
2735	G_462781	-0.6269	-0.45	0.771689		309402 OPHN1 oligophrenin 1 Hs.128824 AA706097 4983
2592	G_838446	-0.5573	-0.53333	0.771378		116272 FLJ23462 duodenal cytochrome b Hs.31297 AA457501 79901
2865	G_415692	-0.57257	-0.51667	0.771223		99979 CROT **carnitine O-octanoyltransferase Hs.12743 W78862 54677
2749	G_781061	-0.52294	-0.56667	0.771091		102986 CDC14B CDC14 cell division cycle 14 homolog B (S. cerevisiae) Hs.22116 AA430172 8555
2180	G_1467207	-0.50366	-0.58333	0.77068		225463 P125 Sec23-interacting protein p125 Hs.300208 AA884713 11196
1175	G_1470128	-0.32233	-0.7	0.770647		315148 Homo sapiens mRNA; cDNA DKFZp313B1821 (from clone DKFZp313B1821) Hs.98518 AA865547
669	G_712401	-0.63684	-0.43333	0.770286		114116 PIK3CD phosphoinositide-3-kinase, catalytic, delta polypeptide Hs.162808 AA281652 5293
1420	G_589869	0.6582	0.4	0.770212		104817 TAZ transcriptional co-activator with PDZ-binding motif (TAZ) Hs.24341 AA148213 25937
5007	G_1687361	-0.70186	-0.31667	0.769992		315391 ESTs Hs.134778 AI089974
3070	G_1585211	0.55515	0.53333	0.769826		100427 LOC51175 epsilon-tubulin Hs.34851 AA973969 51175
1970	G_1486109	-0.64697	-0.41667	0.769535		105294 EIF3S2 eukaryotic translation initiation factor 3, subunit 2 beta, 36kDa Hs.192023 AA936783 8668
1128	G_308163	-0.58473	-0.5	0.769356		118763 YAP1 Yes-associated protein 1, 65kDa Hs.84520 N92380 10413
1679	G_795322	-0.43649	-0.63333	0.769175		118381 ESTs Hs.53455 AA454165
198	G_203918	-0.38221	-0.66667	0.768462		100316 KIAA1727 KIAA1727 protein Hs.319946 H56655 85462
676	G_66965	-0.40989	-0.65	0.768446		110191 ARNT aryl hydrocarbon receptor nuclear translocator Hs.166172 T67552 405
205	G_123326	0.55276	0.53333	0.768104		104361 Homo sapiens mRNA; cDNA DKFZp686H157 (from clone DKFZp686H157) Hs.90424 R00311
3411	G_241282	0.71385	0.28333	0.768022		222628 Homo sapiens cDNA FLJ34225 fis, clone FCBBF3023372 Hs.299797 H91167
3139	G_470546	-0.37999	-0.66667	0.76736		111515 CPXM **carboxypeptidase X (M14 family) Hs.177536 AA031596 56265
342	G_841666	-0.45581	-0.61667	0.766841		120930 MAIL molecule possessing ankyrin repeats induced by lipopolysaccharide (MAIL), homolog of mouse Hs.301183 AA487561 64332
4858	G_1555686	-0.63208	-0.43333	0.766355		318437 EST Hs.146746 AI147547
871	G_741880	0.58065	0.5	0.76626		119414 PBX1 pre-B-cell leukemia transcription factor 1 Hs.155691 AA401304 pbx-1=pre-B cell leukemia transcription factor-1=prl=fused t 5087
331	G_510116	-0.60775	-0.46667	0.766251		102392 S100P S100 calcium binding protein P Hs.2962 AA053016 6286
372	G_325070	-0.53335	-0.55	0.766135		104191 LXN **latexin protein Hs.109276 W46976 56925
4621	G_416240	-0.70491	-0.3	0.766093		108057 EBRP emopamil binding related protein, delta8-delta7 sterol isomerase related protein Hs.298490 W85854 84650
3380	G_1519224	0.61958	0.45	0.765754		223411 FGD1 faciogenital dysplasia (Aarskog-Scott syndrome) Hs.1572 AA902269 2245
46	G_1505294	-0.60712	-0.46667	0.765752		221412 Homo sapiens cDNA FLJ30428 fis, clone BRACE2008941 Hs.131740 AA905838
1152	G_503083	0.74348	0.18333	0.76575		98966 MEIS2 Meis1, myeloid ecotropic viral integration site 1 homolog 2 (mouse) Hs.104105 AA148640 4212
1441	G_448093	0.67094	0.36667	0.764596		307080 Homo sapiens cDNA FLJ31317 fis, clone LIVER1000421, moderately similar to CYTOCHROME P450 3A5 (EC 1.14.14.1) Hs.350826 AA702706
4014	G_2273365	0.49396	0.58333	0.764376		312098 TBX19 T-box 19 Hs.50403 AI630980 9095
1905	G_433696	-0.40215	-0.65	0.764346		222918 EST Hs.325451 AA699342
2526	G_46365	-0.53077	-0.55	0.764341		112748 KIAA1145 KIAA1145 protein Hs.173392 H09774 57458
197	G_357298	-0.40167	-0.65	0.764093		99430 Homo sapiens mRNA; cDNA DKFZp762M127 (from clone DKFZp762M127) Hs.22483 W93688
3448	G_204214	0.473	0.6	0.764022		113549 CDC6 CDC6 cell division cycle 6 homolog (S. cerevisiae) Hs.69563 H59203 990
2821	G_767289	-0.56264	-0.51667	0.763879		112815 FLJ10055 **hypothetical protein FLJ10055 Hs.9398 AA418418 55062
2956	G_826995	-0.52997	-0.55	0.763785		224627 LOC64116 up-regulated by BCG-CWS Hs.284205 AA521384 64116
3474	G_66406	0.51159	0.56667	0.763439		117169 DKFZp762E1312 hypothetical protein DKFZp762E1312 Hs.104859 T66935 55355
1380	G_782669	0.75153	0.13333	0.763266		119739 Homo sapiens mRNA; cDNA DKFZp686M1417 (from clone DKFZp686M1417) Hs.255938 AA447583
4291	G_345849	-0.47144	-0.6	0.763057		115196 LOX lysyl oxidase Hs.102267 W70343 4015
2110	G_486538	-0.54563	-0.53333	0.76299		226285 FLJ10326 hypothetical protein FLJ10326 Hs.262823 AA042812 55699
4714	G_1474023	-0.47131	-0.6	0.762976		330918 JAG1 jagged 1 (Alagille syndrome) Hs.91143 AA933616 182
1168	G_110467	-0.425	-0.63333	0.762714		115140 CAV2 caveolin 2 Hs.139851 T84152 858
1064	G_700517	-0.545	-0.53333	0.762539		220584 Homo sapiens cDNA FLJ30652 fis, clone DFNES2000011 Hs.5724 AA291159
3524	G_113856	-0.75555	-0.1	0.762139		228984 CCND1 cyclin D1 (PRAD1: parathyroid adenomatosis 1) Hs.82932 T77237 595
4439	G_825088	-0.36919	-0.66667	0.76207		162287 A2LP **ataxin 2 related protein Hs.43509 AA489238 Unknown 11273
4936	G_74223	-0.64761	-0.4	0.761182		102950 HTPAP HTPAP protein Hs.169341 T48411 84513
235	G_898251	-0.65702	-0.38333	0.760669		109957 FLJ20727 hypothetical protein FLJ20727 Hs.300700 AA598675 55031
2405	G_814702	-0.52517	-0.55	0.760463		226265 SRP72 signal recognition particle 72kDa Hs.237825 AA481069 6731
155	G_195903	0.4672	0.6	0.760445		115990 FLJ20624 **hypothetical protein FLJ20624 Hs.52256 R92227 55003
2153	G_809627	-0.55763	-0.51667	0.760197		107134 NRIP1 nuclear receptor interacting protein 1 Hs.155017 AA442995 8204
734	G_1492448	-0.61158	-0.45	0.759296		112800 ARHB **ras homolog gene family, member B Hs.204354 AA878590 388
2824	G_1677231	-0.48558	-0.58333	0.758987		308515 SLC5A1 solute carrier family 5 (sodium/glucose cotransporter), member 1 Hs.1964 AI078794 6523
366	G_35503	-0.44245	-0.61667	0.758976		99029 C1QR1 complement component 1, q subcomponent, receptor 1 Hs.97199 R14981 22918
4717	G_324891	-0.50488	-0.56667	0.758959		99733 DEGS degenerative spermatocyte homolog, lipid desaturase (Drosophila) Hs.185973 W49667 8560
114	G_754559	-0.41768	-0.63333	0.758659		105028 AF038169 **hypothetical protein AF038169 Hs.145567 AA406301 29798
4182	G_1908808	0.58473	0.48333	0.758628		318066 ESTs Hs.150803 AI302306
4556	G_243244	-0.66374	-0.36667	0.758286		116904 UCP4 uncoupling protein 4 Hs.40510 H94680 9481
2502	G_730633	-0.38956	-0.65	0.757797		105414 LUC7A **cisplatin resistance-associated overexpressed protein Hs.3688 AA411969 51747
195	G_366902	-0.53769	-0.53333	0.757332		307304 SLPI secretory leukocyte protease inhibitor (antileukoproteinase) Hs.251754 AA026099 6590
2808	G_151597	-0.58294	-0.48333	0.75725		106081 OSBPL10 oxysterol binding protein-like 10 Hs.321622 H03146 114884
2629	G_51406	-0.59628	-0.46667	0.757186		113154 SLC13A3 solute carrier family 13 (sodium-dependent dicarboxylate transporter), member 3 Hs.102867 H18950 64849
2785	G_271038	-0.41434	-0.63333	0.756825		118448 RGS5 regulator of G-protein signalling 5 Hs.24950 N34362 8490
2437	G_562778	-0.55292	-0.51667	0.756749		221914 LIM LIM protein (similar to rat protein kinase C-binding enigma) Hs.154103 AA086432 10611
1480	G_2056139	-0.64225	-0.4	0.756627		307626 RIL LIM domain protein Hs.79691 AI334917 8572
1404	G_206287	0.72483	0.21667	0.756521		105565 STARD4 START domain containing 4, sterol regulated Hs.93842 H58317 134429
3405	G_786078	0.60757	0.45	0.75607		106528 POLE2 polymerase (DNA directed), epsilon 2 (p59 subunit) Hs.99185 AA448664 5427
4379	G_1526789	0.63076	0.41667	0.755958		224759 MYBL1 v-myb myeloblastosis viral oncogene homolog (avian)-like 1 Hs.300592 AA911236 4603
622	G_186767	-0.35551	-0.66667	0.755537		222607 HLA-DRB4 major histocompatibility complex, class II, DR beta 4 Hs.318720 H50622 3126
1450	G_365085	-0.54999	-0.51667	0.75461		118459 TRPS1 trichorhinophalangeal syndrome I Hs.26102 AA024603 7227
3314	G_2325609	0.56485	0.5	0.754358		313311 MCM7 MCM7 minichromosome maintenance deficient 7 (S. cerevisiae) Hs.77152 AI688220 4176
598	G_71863	-0.49724	-0.56667	0.753898		112965 SLC11A3 solute carrier family 11 (proton-coupled divalent metal ion transporters), member 3 Hs.5944 T52564 30061
824	G_1650927	-0.53249	-0.53333	0.753649		310235 DKFZp547E052 hypothetical protein DKFZp547E052 Hs.49359 AI022999 84236
901	G_768272	-0.54808	-0.51667	0.753219		103509 GOLGA2 **golgi autoantigen, golgin subfamily a, 2 Hs.24049 AA424786 2801
2768	G_788541	0.67486	0.33333	0.752692		106040 Homo sapiens cDNA FLJ14201 fis, clone NT2RP3002955 Hs.193063 AA452816
2831	G_773204	-0.47543	-0.58333	0.752534		111467 AA425692
1417	G_842760	-0.56135	-0.5	0.751741		99556 TSG twisted gastrulation Hs.247302 AA486182 57045
938	G_1623955	-0.66489	-0.35	0.751385		308597 ESTs, Weakly similar to neuronal thread protein [Homo sapiens] [H.sapiens] Hs.55168 AA993294
4563	G_486304	-0.4034	-0.63333	0.750892		225790 RASAL2 RAS protein activator like 2 Hs.227806 AA043652 9462
3346	G_809588	0.58789	0.46667	0.750597		104849 GGH gamma-glutamyl hydrolase (conjugase, folylpolygammaglutamyl hydrolase) Hs.78619 AA455800 8836
2331	G_448190	-0.45008	-0.6	0.750048		101464 BIRC2 baculoviral IAP repeat-containing 2 Hs.289107 AA702174 329
4833	G_486035	-0.40111	-0.63333	0.749664		224114 UAP1 UDP-N-acteylglucosamine pyrophosphorylase 1 Hs.21293 AA040861 6675
4836	G_179211	-0.62235	-0.41667	0.748955		117945 GPCR1 putative G protein-coupled receptor Hs.97101 H50224 26996
4266	G_767172	-0.39914	-0.63333	0.748612		111660 Homo sapiens mRNA full length insert cDNA clone EUROIMAGE 248114 Hs.8963 AA424560
3476	G_588840	0.65258	0.36667	0.748537		99597 IFIT1 **interferon-induced protein with tetratricopeptide repeats 1 Hs.20315 AA157787 3434
4715	G_141815	-0.44745	-0.6	0.748473		107270 JAG1 jagged 1 (Alagille syndrome) Hs.91143 R70684 182
1105	G_1690115	0.5251	0.53333	0.748446		318910 Homo sapiens cDNA FLJ34988 fis, clone OCBBF2011021, highly similar to KILON PROTEIN PRECURSOR Hs.299916 AI123532
2652	G_770983	-0.46885	-0.58333	0.748394		116474 FLJ11730 hypothetical protein FLJ11730 Hs.17118 AA427401 64769
3442	G_727526	0.58458	0.46667	0.748007		120314 CENPE centromere protein E, 312kDa Hs.75573 AA402431 CENP-E=putative kinetochore motor that accumulates just befo 1062
4792	G_376516	-0.44641	-0.6	0.747852		101077 LRBA LPS-responsive vesicle trafficking, beach and anchor containing Hs.62354 AA041400 987
897	G_45099	-0.6316	-0.4	0.747609		114261 RGN regucalcin (senescence marker protein-30) Hs.77854 H05140 9104
870	G_855910	-0.33815	-0.66667	0.747525		112326 LGALS3 lectin, galactoside-binding, soluble, 3 (galectin 3) Hs.621 AA630328 3958
3475	G_68950	0.50571	0.55	0.747156		112883 CCNE1 cyclin E1 Hs.9700 T54121 898
1515	G_796323	-0.60861	-0.43333	0.747115		115634 ADD3 adducin 3 (gamma) Hs.324470 AA459743 120
4448	G_251612	0.67645	0.31667	0.746903		111491 ESTs Hs.269029 H96712
719	G_487513	-0.53828	-0.51667	0.746119		118511 CTGF connective tissue growth factor Hs.75511 AA044993 1490
3579	G_248256	0.50405	0.55	0.746034		116071 KIAA1691 KIAA1691 protein Hs.94761 N58487 80727
952	G_1492276	-0.52129	-0.53333	0.745778		306966 RNASE4 ribonuclease, RNase A family, 4 Hs.283749 AA888213 6038
2845	G_510576	-0.53676	-0.51667	0.745023		108627 AGR2 anterior gradient 2 homolog (Xenepus laevis) Hs.91011 AA055768 10551
2748	G_731127	-0.36399	-0.65	0.744976		106054 CDC14B CDC14 cell division cycle 14 homolog B (S. cerevisiae) Hs.22116 AA417319 cdc14B=tyrosine phosphatase 8555
3558	G_739230	0.52009	0.53333	0.744939		223984 LDB1 LIM domain binding 1 Hs.26002 AA421183 8861
716	G_139883	-0.56649	-0.48333	0.74466		120179 KIAA1754 KIAA1754 protein Hs.28501 R64153 85450
534	G_2312765	-0.58025	-0.46667	0.744628		317130 HF1 H factor 1 (complement) Hs.250651 AI669507 3075
1568	G_878596	-0.48268	-0.56667	0.744375		117871 ITM2A integral membrane protein 2A Hs.17109 AA775257 9452
5002	G_488964	-0.70672	-0.23333	0.744242		226020 H2AFO H2A histone family, member O Hs.795 AA047260 8337
1792	G_280845	-0.48242	-0.56667	0.744207		108011 ANKH ankylosis, progressive homolog (mouse) Hs.168640 N47523 56172
4984	G_1944078	-0.74093	-0.06667	0.743923		107836 ESTs, Weakly similar to hypothetical protein FLJ20378 [Homo sapiens] [H.sapiens] Hs.34549 AI201945
3874	G_1075717	0.53886	0.5125	0.743657		113159 SF3A2 **splicing factor 3a, subunit 2, 66kDa Hs.115232 AA588012 8175
832	G_505573	-0.61515	-0.41667	0.742983		118637 PYGL **phosphorylase, glycogen; liver (Hers disease, glycogen storage disease type VI) Hs.771 AA147640 5836
1140	G_131563	-0.54933	-0.5	0.742808		103772 FLJ21069 hypothetical protein FLJ21069 Hs.341806 R24223 79745
1714	G_151449	-0.51693	-0.53333	0.742737		120243 PTPN21 protein tyrosine phosphatase, non-receptor type 21 Hs.155693 H03504 protein-tyrosine-phosphatase D1 11099
2898	G_51918	-0.49915	-0.55	0.742732		111501 KIAA0095 **KIAA0095 gene product Hs.155314 H22925 9688
5016	G_81578	-0.54922	-0.5	0.742726		114085 SEL1L sel-1 suppressor of lin-12-like (C. elegans) Hs.181300 T65844 6400
1463	G_303109	-0.53338	-0.51667	0.742591		119872 P2Y5 purinergic receptor (family A group 5) Hs.189999 N90783 purinergic receptor P2Y5=RB intorn-encoded putative G-protei 10161
4290	G_375834	-0.43517	-0.6	0.741197		109984 LOX lysyl oxidase Hs.102267 AA037732 4015
3488	G_357791	0.56147	0.48333	0.740848		114372 Homo sapiens cDNA FLJ40794 fis, clone TRACH2007676 Hs.49892 W95600
4240	G_254562	0.56094	0.48333	0.740447		101774 ESTs Hs.43410 N23651
287	G_154790	-0.58731	-0.45	0.739887		118434 NGFR nerve growth factor receptor (TNFR superfamily, member 16) Hs.1827 R55303 4804
2811	G_782760	-0.52888	-0.51667	0.739366		99208 CYP1B1 cytochrome P450, subfamily I (dioxin-inducible), polypeptide 1 (glaucoma 3, primary infantile) Hs.154654 AA448157 Cytochrome P450 IB1 (dioxin-inducible) 1545
322	G_985230	-0.64192	-0.36667	0.739262		101205 TGM4 transglutaminase 4 (prostate) Hs.2387 AA564047 7047
1266	G_1911594	-0.69503	-0.25	0.738625		319373 Homo sapiens mRNA; cDNA DKFZp686I18116 (from clone DKFZp686I18116) Hs.67317 AI268097
324	G_773157	-0.4063	-0.61667	0.738486		120766 SPRY4 sprouty homolog 4 (Drosophila) Hs.381153 AA425382 81848
768	G_62263	-0.63048	-0.38333	0.737866		120882 ADAMTS1 a disintegrin-like and metalloprotease (reprolysin type) with thrombospondin type 1 motif, 1 Hs.8230 T40309 9510
3555	G_809720	0.55723	0.48333	0.73764		108824 CENPB centromere protein B, 80kDa Hs.85004 AA455480 1059
666	G_121275	-0.47176	-0.56667	0.737341		104091 Homo sapiens cDNA FLJ40688 fis, clone THYMU2024185, highly similar to HLA CLASS II HISTOCOMPATIBILITY ANTIGEN, DX BETA CHAIN PRECURSOR Hs.375115 T96621
1204	G_754106	-0.31435	-0.66667	0.737065		178285 TIMP3 tissue inhibitor of metalloproteinase 3 (Sorsby fundus dystrophy, pseudoinflammatory) Hs.245188 AA478662 TIMP-3=Tissue inhibitor of metalloproteinase 3 7078
4932	G_1521297	-0.5255	-0.51667	0.736952		104346 Homo sapiens mRNA; cDNA DKFZp434E235 (from clone DKFZp434E235) Hs.348724 AA923082
495	G_202577	-0.56965	-0.46667	0.736398		102476 HNMT histamine N-methyltransferase Hs.81182 H53274 3176
3930	G_884993	-0.72949	-0.1	0.736312		115351 UQCR ubiquinol-cytochrome c reductase (6.4kD) subunit Hs.8372 AA629862 10975
1097	G_813823	-0.34555	-0.65	0.736142		110722 LUM lumican Hs.79914 AA447781 4060
2741	G_768395	-0.42647	-0.6	0.736123		99716 Homo sapiens cDNA FLJ36515 fis, clone TRACH2001810 Hs.33905 AA495819
5021	G_1858220	-0.55495	-0.48333	0.735919		316319 Homo sapiens cDNA FLJ36850 fis, clone ASTRO2014211 Hs.102682 AI225098
5014	G_418093	-0.5399	-0.5	0.735861		109485 SEL1L sel-1 suppressor of lin-12-like (C. elegans) Hs.181300 W90073 6400
3443	G_1473682	0.56884	0.46667	0.735772		222175 MGC15716 hypothetical protein MGC15716 Hs.332563 AA916726 84330
3439	G_769921	0.40072	0.61667	0.735431		119851 UBE2C ubiquitin-conjugating enzyme E2C Hs.93002 AA430504 11065
1875	G_128457	-0.46831	-0.56667	0.735139		98618 NR5A2 nuclear receptor subfamily 5, group A, member 2 Hs.183123 R10138 2494
2574	G_1564597	-0.55387	-0.48333	0.735105		309961 Homo sapiens mRNA; cDNA DKFZp686A1444 (from clone DKFZp686A1444) Hs.58966 AA960842
2404	G_460114	-0.627	-0.38333	0.734895		102988 UTRN utrophin (homologous to dystrophin) Hs.286161 AA676840 7402
4446	G_255667	0.62689	0.38333	0.734801		222747 Homo sapiens cDNA FLJ32605 fis, clone STOMA1000175 Hs.351292 N26190
4310	G_121857	0.66304	0.31667	0.73478		224002 DEEPEST mitotic spindle coiled-coil related protein Hs.16244 T97349 10615
1365	G_669485	-0.7156	-0.16667	0.734753		114642 EGFR epidermal growth factor receptor (erythroblastic leukemia viral (v-erb-b) oncogene homolog, avian) Hs.77432 AA234715 1956
2766	G_1605178	0.69568	0.23333	0.733767		222603 SLC38A1 solute carrier family 38, member 1 Hs.18272 AA988049 81539
1980	G_278002	-0.39734	-0.61667	0.733595		117909 KIAA1078 KIAA1078 protein Hs.23585 N63447 23271
1777	G_741790	-0.39712	-0.61667	0.733475		224318 FLJ20080 hypothetical protein FLJ20080 Hs.7942 AA402965 54812
1599	G_345118	-0.59169	-0.43333	0.733398		100612 Homo sapiens cDNA: FLJ21447 fis, clone COL04468 Hs.44241 W72920
4497	G_152138	-0.46557	-0.56667	0.733396		111227 ESTs Hs.238809 H02979
4445	G_773335	0.53619	0.5	0.733144		110916 IGSF3 immunoglobulin superfamily, member 3 Hs.81234 AA425437 3321
4311	G_1457414	0.63441	0.36667	0.73275		114422 ESTs, Weakly similar to hypothetical protein FLJ20234 [Homo sapiens] [H.sapiens] Hs.150401 AA922916
2787	G_341805	-0.48405	-0.55	0.732669		113359 MSTP032 MSTP032 protein Hs.274368 W60845 80340
4060	G_1635538	0.30227	0.66667	0.731995		310273 SDC1 syndecan 1 Hs.82109 AI015641 6382
1861	G_195987	-0.394	-0.61667	0.731791		318822 **Homo sapiens mRNA; cDNA DKFZp761H1120 (from clone DKFZp761H1120) Hs.356350 R91407
1382	G_754581	0.69335	-0.23333	0.731558		98454 KIAA1305 KIAA1305 protein Hs.288348 AA406197 57523
3553	G_345850	0.5893	0.43333	0.731471		226872 LOC144097 hypothetical protein BC007540 Hs.63405 W70336 144097
3234	G_198559	-0.51762	-0.51667	0.731354		308602 KIAA0853 KIAA0853 protein Hs.136102 R94720 23091
4153	G_786076	-0.51738	-0.51667	0.731184		99714 GOLPH4 **golgi phosphoprotein 4 Hs.143600 AA448663 27333
4916	G_1553723	-0.68691	-0.25	0.730989		307602 SIM2 single-minded homolog 2 (Drosophila) Hs.27311 AA983560 6493
4832	G_294496	-0.48135	-0.55	0.730888		112902 Homo sapiens mRNA; cDNA DKFZp667I137 (from clone DKFZp667I137) Hs.355279 N69521
3399	G_74738	0.51666	0.51667	0.730675		120619 MGC20486 hypothetical protein MGC20486 Hs.80449 T57359 89891
819	G_123926	-0.36403	-0.63333	0.730496		99904 CTSK cathepsin K (pycnodysostosis) Hs.83942 R00859 1513
3341	G_1070324	0.54758	0.48333	0.730378		223680 FLJ14813 hypothetical protein FLJ14813 Hs.14014 AA780791 84930
1101	G_756556	-0.33304	-0.65	0.730353		116990 SERPING1 serine (or cysteine) proteinase inhibitor, clade G (C1 inhibitor), member 1, (angioedema, hereditary) Hs.151242 AA481438 710
2504	G_1866026	-0.41508	-0.6	0.729583		316922 WASL Wiskott-Aldrich syndrome-like Hs.170065 AI271884 8976
64	G_1502757	0.515	0.51667	0.729502		112509 ESTs Hs.130801 AA894672
4941	G_452936	-0.63957	-0.35	0.729075		223347 MGC31963 hypothetical protein MGC31963 Hs.293984 AA778869 112770
813	G_823647	-0.36075	-0.63333	0.728867		102382 AMOT angiomotin Hs.9271 AA490582 154796
1570	G_322005	-0.68428	-0.25	0.728518		116130 ESTs Hs.43845 W37418
535	G_1592021	-0.3598	-0.63333	0.728398		307158 HFL1 H factor (complement)-like 1 Hs.278568 AA953249 3078
845	G_49354	0.7282	0	0.7282		226558 **Homo sapiens, clone IMAGE:4246029, mRNA Hs.367913 H15098
3058	G_282884	-0.43585	-0.58333	0.728175		114430 ESTs Hs.46476 N45114
4847	G_310493	-0.49566	-0.53333	0.728093		110011 FACL3 fatty-acid-Coenzyme A ligase, long-chain 3 Hs.268012 N98509 2181
3400	G_700721	0.47701	0.55	0.728037		102679 MCM5 MCM5 minichromosome maintenance deficient 5, cell division cycle 46 (S. cerevisiae) Hs.77171 AA283961 4174
567	G_431425	-0.47641	-0.55	0.727644		221894 ESTs, Highly similar to MSSP_HUMAN Single-stranded DNA-binding protein MSSP-1 (RNA binding motif, single-stranded interacting protein 1) [H.sapiens] Hs.221594 AA706858
4712	G_1589538	-0.55811	-0.46667	0.727508		116268 PARG1 **PTPL1-associated RhoGAP 1 Hs.70983 AA977723 9411
1634	G_1505534	-0.43326	-0.58333	0.726628		220524 NOV nephroblastoma overexpressed gene Hs.235935 AA910443 4856
3620	G_151620	-0.67576	-0.26667	0.726474		103956 CAC-1 CAC-1 Hs.343912 H03154 113452
1387	G_823590	0.71645	0.11667	0.725887		110969 STHM sialyltransferase Hs.288215 AA497051 10610
724	G_2043167	-0.60492	-0.4	0.725209		313933 BAG3 BCL2-associated athanogene 3 Hs.15259 AI371684 9531
1432	G_51826	0.66721	0.28333	0.724876		110141 NNT nicotinamide nucleotide transhydrogenase Hs.18136 H22944 23530
2648	G_786220	-0.56808	-0.45	0.724717		113094 RAB4A RAB4A, member RAS oncogene family Hs.119007 AA478440 5867
3390	G_81427	0.64348	0.33333	0.72469		107426 TITF1 thyroid transcription factor 1 Hs.197764 AI820508 7080
2078	G_124298	-0.40628	-0.6	0.724613		222746 MGST3 microsomal glutathione S-transferase 3 Hs.111811 R02085 4259
5097	G_77915	-0.6149	-0.38333	0.724599		114857 PLA2G2A phospholipase A2, group IIA (platelets, synovial fluid) Hs.76422 T61271 5320
840	G_204737	0.45114	0.56667	0.724322		103060 SNAI2 snail homolog 2 (Drosophila) Hs.93005 H57309 6591
3487	G_1324551	0.23936	0.68333	0.724039		120280 ESTs, Weakly similar to SFPQ_HUMAN Splicing factor, proline-and glutamine-rich (Polypyrimidine tract-binding protein-associated splicing factor) (PTB-associated splicing factor) (PSF) (DNA-binding P52 Hs.140295 AA740368
3359	G_377641	0.65896	0.3	0.724036		116531 Homo sapiens cDNA FLJ25561 fis, clone JTH02933 Hs.356359 AA055904
4760	G_344243	-0.66626	-0.28333	0.724002		107148 UMPK uridine monophosphate kinase Hs.75939 W69906 7371
2053	G_141671	-0.55333	-0.46667	0.723847		309381 Homo sapiens cDNA: FLJ22918 fis, clone KAT06627 Hs.289018 R69329
2007	G_429811	-0.48909	-0.53333	0.723637		100340 LOC115294 similar to hypothetical protein FLJ10883 Hs.60293 AA009755 115294
2783	G_1758233	-0.48883	-0.53333	0.723461		319583 RGS4 regulator of G-protein signalling 4 Hs.227571 AI220643 5999
1513	G_1587715	-0.50621	-0.51667	0.723323		310459 EST Hs.128435 AA975436
2088	G_811627	-0.53796	-0.48333	0.723194		99482 FLJ14681 hypothetical protein FLJ14681 Hs.23317 AA455026 84910
4585	G_123608	-0.68972	-0.21667	0.722952		308391 FHIT fragile histidine triad gene Hs.77252 R00843 2272
1135	G_22161	-0.61278	-0.38333	0.722801		102838 Homo sapiens cDNA: FLJ22050 fis, clone HEP09454 Hs.173705 T66154
1138	G_343443	-0.53661	-0.48333	0.72219		104510 RBPMS RNA-binding protein gene with multiple splicing Hs.80248 W67200 11030
2600	G_307220	-0.50418	-0.51667	0.721904		108074 LOC51313 **AD021 protein Hs.323583 N95180 51313
3550	G_509980	0.42497	0.58333	0.721716		109383 KRT8 keratin 8 Hs.242463 AA052978 3856
2568	G_80292	-0.42438	-0.58333	0.721368		107947 Homo sapiens cDNA FLJ40637 fis, clone THYMU2015984 Hs.6390 T64433
22	G_725927	-0.68258	-0.23333	0.721359		118056 FLJ23231 **hypothetical protein FLJ23231 Hs.288300 AA292382 80149
2778	G_357236	-0.62112	-0.36667	0.721275		106816 ESTs Hs.79953 W93637
1262	G_701819	-0.42355	-0.58333	0.72088		226682 MBLL39 muscleblind-like protein MBLL39 Hs.283609 AA287121 10150
398	G_2543464	-0.53461	-0.48333	0.720705		331249 SERPINA3 serine (or cysteine) proteinase inhibitor, clade A (alpha-1 antiproteinase, antitrypsin), member 3 Hs.234726 AW029498 12
1960	G_488033	-0.31075	-0.65	0.720462		98431 DNAJB9 DnaJ (Hsp40) homolog, subfamily B, member 9 Hs.6790 AA045792 4189
487	G_490965	-0.53378	-0.48333	0.72009		103054 ESTs, Highly similar to THYA_HUMAN Prothymosin alpha [H.sapiens] Hs.380149 AA120865
1203	G_510729	-0.27123	-0.66667	0.719732		308094 PTPN21 protein tyrosine phosphatase, non-receptor type 21 Hs.155693 AA099627 11099
4977	G_855157	-0.71943	0.01667	0.719623		226019 MGC4309 hypothetical protein MGC4309 Hs.32417 AA781491 79098
5118	G_416409	-0.61904	-0.36667	0.719484		118661 Homo sapiens clone 24641 mRNA sequence Hs.374838 W86876
4724	G_815087	-0.44312	-0.56667	0.719354		184974 **Homo sapiens cDNA FLJ33216 fis, clone ASTRO2000278 Hs.356141 AA465193 Unknown UG Hs.171857 ESTs sc_id2483
3430	G_843049	0.51684	0.5	0.719113		105078 MCM4 MCM4 minichromosome maintenance deficient 4 (S. cerevisiae) Hs.154443 AA485983 4173
4958	G_249895	-0.66782	-0.26667	0.719094		114946 ESTs Hs.3772 H96990
147	G_1951096	0.68531	0.21667	0.718746		316782 FLJ22501 hypothetical protein FLJ22501 Hs.125133 AI351205 79803
4815	G_41826	-0.49938	-0.51667	0.71856		309354 Homo sapiens, clone IMAGE:2899977, mRNA, partial cds Hs.352670 R54110
2774	G_561971	-0.36875	-0.61667	0.718511		110132 Homo sapiens mRNA; cDNA DKFZp586F1822 (from clone DKFZp586F1822) Hs.82719 AA088886
946	G_2442397	-0.30585	-0.65	0.718362		330729 ALDH2 aldehyde dehydrogenase 2 family (mitochondrial) Hs.195432 AI890849 217
823	G_285681	-0.62674	-0.35	0.717846		119671 DKFZp547E052 hypothetical protein DKFZp547E052 Hs.49359 N67578 84236
2271	G_263267	-0.49823	-0.51667	0.717761		310854 D5S346 DNA segment, single copy probe LNS-CAI/LNS-CAII (deleted in polyposis Hs.178112 H99944 7905
4993	G_1891596	-0.4803	-0.53333	0.717725		313485 AI287555
1804	G_29828	-0.53004	-0.48333	0.717322		113495 TSC22 **transforming growth factor beta-stimulated protein TSC-22 Hs.114360 R16390 8848
4009	G_743114	0.26291	0.66667	0.716638		120161 HSPBP1 hsp70-interacting protein Hs.53066 AA401391 23640
1257	G_880747	0.52908	0.48333	0.716613		104969 MGC3036 hypothetical protein MGC3036 Hs.284135 AA468776 65999
825	G_726661	0.41554	0.58333	0.716203		112525 KIAA1210 KIAA1210 protein Hs.97594 AA398246 57481
4395	G_897678	0.68227	0.21667	0.715848		117809 PEG10 **paternally expressed 10 Hs.137476 AA598754 23089
4301	G_430052	0.3334	0.63333	0.715725		107106 ESTs Hs.373490 AA034178
937	G_811740	-0.52767	-0.48333	0.715572		101540 ITGA2 integrin, alpha 2 (CD49B, alpha 2 subunit of VLA-2 receptor) Hs.271986 AA463257 3673
4489	G_343387	-0.62351	-0.35	0.715028		119934 Homo sapiens cDNA FLJ36097 fis, clone TESTI2020956 Hs.43791 W67291
2710	G_1540436	-0.29766	-0.65	0.714914		310917 RAB27A RAB27A, member RAS oncogene family Hs.50477 AA927187 5873
3154	G_325355	-0.29683	-0.65	0.714568		99996 LTBP2 latent transforming growth factor beta binding protein 2 Hs.83337 W52204 4053
3709	G_1862529	0.47526	0.53333	0.714362		102532 ESTs Hs.133120 AI054317
4890	G_1762111	-0.43458	-0.56667	0.714125		312919 NPR3 natriuretic peptide receptor C/guanylate cyclase C (atrionatriuretic peptide receptor C) Hs.123655 AI222701 4883
4943	G_1555427	0.38694	0.6	0.713949		221460 SPINT1 serine protease inhibitor, Kunitz type 1 Hs.233950 AA975209 6692
1727	G_954812	-0.60222	-0.38333	0.71387		117922 Homo sapiens cDNA FLJ33834 fis, clone CTONG2004264, moderately similar to NEUROBLAST DIFFERENTIATION ASSOCIATED PROTEIN AHNAK Hs.378738 AA504029
1446	G_1709786	-0.525	-0.48333	0.713606		318515 TRPS1 trichorhinophalangeal syndrome I Hs.26102 AI130713 7227
1811	G_417867	-0.52465	-0.48333	0.713348		116899 XBP1 X-box binding protein 1 Hs.149923 W90128 7494
178	G_258101	-0.43238	-0.56667	0.712788		224575 Homo sapiens cDNA FLJ35153 fis, clone PLACE6010765 Hs.22968 N30348
302	G_269423	0.67872	0.21667	0.712465		111738 OSBPL3 oxysterol binding protein-like 3 Hs.197955 N24076 26031
4975	G_795877	-0.66703	-0.25	0.712341		99936 SNK serum-inducible kinase Hs.3838 AA460152 10769
2476	G_591266	-0.53785	-0.46667	0.712084		107932 FAT FAT tumor suppressor homolog 1 (Drosophila) Hs.166994 AA159194 2195
2510	G_2511553	-0.50697	-0.5	0.712052		331199 UQCRC2 ubiquinol-cytochrome c reductase core protein II Hs.173554 AW007636 7385
600	G_80109	-0.4083	-0.58333	0.712027		117106 HLA-DQA1 major histocompatibility complex, class II, DQ alpha 1 Hs.198253 T63324 3117
1193	G_529302	-0.4077	-0.58333	0.711683		116344 Homo sapiens mRNA; cDNA DKFZp686I18116 (from clone DKFZp686I18116) Hs.67317 AA069696
2594	G_626390	-0.489	-0.51667	0.711385		108677 KIAA1102 KIAA1102 protein Hs.202949 AA188890 22998
789	G_767765	-0.52181	-0.48333	0.711262		103073 GEM GTP binding protein overexpressed in skeletal muscle Hs.79022 AA418077 2669
2763	G_1031885	-0.50153	-0.50417	0.71114		226469 KIAA1344 KIAA1344 protein Hs.30652 AA609723 57544
1868	G_840600	-0.42965	-0.56667	0.711136		107635 GNB1 guanine nucleotide binding protein (G protein), beta polypeptide 1 Hs.215595 AA487912 2782
4843	G_811603	-0.47038	-0.53333	0.711125		115782 ATP6V1G1 ATPase, H+ transporting, lysosomal 13kDa, V1 subunit G isoform 1 Hs.90336 AA454616 9550
4996	G_430235	-0.50519	-0.5	0.710786		118058 H2BFQ H2B histone family, member Q Hs.2178 AA010223 8349
2518	G_324672	-0.6088	-0.36667	0.710693		105666 ELL2 ELL-related RNA polymerase II, elongation factor Hs.98124 AA284232 22936
1489	G_796694	0.54988	0.45	0.710541		110227 BIRC5 baculoviral IAP repeat-containing 5 (survivin) Hs.1578 AA460685 Survivin=apoptosis inhibitor=effector cell protease EPR-1 332
5005	G_31008	-0.5496	-0.45	0.710324		307190 ESTs, Weakly similar to hypothetical protein FLJ20489 [Homo sapiens] [H.sapiens] Hs.140237 R17789
4845	G_49944	-0.54953	-0.45	0.71027		120932 FACL3 fatty-acid-Coenzyme A ligase, long-chain 3 Hs.268012 H29214 2181
102	G_27404	0.53544	0.46667	0.710265		99994 CNTNAP2 contactin associated protein-like 2 Hs.106552 R13972 26047
2880	G_454689	-0.57458	-0.41667	0.709758		222769 ESTs Hs.193229 AA677206
2861	G_142851	-0.54882	-0.45	0.709721		111391 FLJ32731 hypothetical protein FLJ32731 Hs.380474 R71481 138050
2653	G_265343	-0.48606	-0.51667	0.709367		111987 SLC2A12 solute carrier family 2 (facilitated glucose transporter), member 12 Hs.26691 N20862 154091
2082	G_796137	-0.48569	-0.51667	0.709114		99301 GOLGA4 golgi autoantigen, golgin subfamily a, 4 Hs.183773 AA460981 2803
812	G_40296	-0.34937	-0.61667	0.70876		111340 Homo sapiens cDNA FLJ32568 fis, clone SPLEN2000098 Hs.12699 R52082
2639	G_308004	-0.64157	-0.3	0.708246		119138 NPR3 natriuretic peptide receptor C/guanylate cyclase C (atrionatriuretic peptide receptor C) Hs.123655 AI668687 4883
2241	G_813187	-0.50146	-0.5	0.70814		118068 Homo sapiens cDNA: FLJ21264 fis, clone COL01579 Hs.303180 AA456324
2203	G_201986	-0.40104	-0.58333	0.707889		117783 Homo sapiens cDNA FLJ37422 fis, clone BRAWH2001241 Hs.46826 R99331
2767	G_1605321	0.66806	0.23333	0.707635		308553 C20orf24 chromosome 20 open reading frame 24 Hs.184062 AA996156 55969
710	G_845477	-0.40054	-0.58333	0.707606		114925 PTGS2 prostaglandin-endoperoxide synthase 2 (prostaglandin G/H synthase and cyclooxygenase) Hs.196384 AA644211 5743
3204	G_2244564	0.5946	0.38333	0.707454		317017 OLFM1 olfactomedin 1 Hs.74376 AI656802 10439
4848	G_1758590	-0.46431	-0.53333	0.707124		311219 FACL3 fatty-acid-Coenzyme A ligase, long-chain 3 Hs.268012 AI206454 2181
1872	G_916559	-0.48207	-0.51667	0.706639		113121 AA573736
3370	G_755459	0.4819	0.51667	0.706524		222789 ESTs Hs.126063 AA423823
4772	G_837908	-0.63122	-0.31667	0.7062		119383 FGFRL1 fibroblast growth factor receptor-like 1 Hs.193326 AA434090 53834
1832	G_745497	-0.59271	-0.38333	0.705866		222629 EST Hs.116115 AA625992
1847	G_711993	-0.42071	-0.56667	0.70577		186427 IFNGR1 interferon gamma receptor 1 Hs.180866 AA281497 interferon-gamma receptor alpha chain 3459
4211	G_244011	0.66583	0.23333	0.70553		98729 ESTs Hs.380683 N38791
2832	G_825842	-0.54319	-0.45	0.705376		103893 AMD1 S-adenosylmethionine decarboxylase 1 Hs.262476 AA504772 262
2825	G_1049346	-0.60235	-0.36667	0.705175		226031 FOXP1 forkhead box P1 Hs.274344 AA620867 27086
2038	G_625384	-0.41955	-0.56667	0.705079		99636 FSTL1 follistatin-like 1 Hs.296267 AA181288 11167
4689	G_840967	-0.34056	-0.61667	0.704459		120787 CKLFSF3 chemokine-like factor super family 3 Hs.7773 AA486561 123920
1176	G_760299	-0.36889	-0.6	0.704329		105080 DKK3 dickkopf homolog 3 (Xenopus laevis) Hs.4909 AA425947 27122
347	G_825622	0.55494	0.43333	0.704083		185593 ESTs Hs.105728 AA504629 Unknown UG Hs.105728 ESTs sc_id2987
1718	G_1556327	-0.33965	-0.61667	0.70402		112364 ESTs Hs.192097 AA916872
905	G_1554167	0.6695	-0.21667	0.703688		220192 JAM3 junctional adhesion molecule 3 Hs.334703 AA931102 83700
785	G_360436	-0.2688	-0.65	0.703387		108645 COPEB core promoter element binding protein Hs.285313 AA013481 1316
4239	G_712600	0.54053	0.45	0.70333		186370 CBFA2T3 core-binding factor, runt domain, alpha subunit 2; translocated to, 3 Hs.110099 AA281930 Unknown UG Hs.110099 Homo sapiens mRNA for MTG8-related pr 863
3394	G_856289	0.63599	0.3	0.703195		223334 CCNB2 cyclin B2 Hs.194698 AA774665 9133
882	G_505335	-0.65036	-0.26667	0.702909		105075 UST uronyl-2-sulfotransferase Hs.134015 AA147495 10090
1799	G_784112	-0.33662	-0.61667	0.702563		112163 FLJ12666 hypothetical protein FLJ12666 Hs.23767 AA432056 79647
1114	G_470122	-0.57723	-0.4	0.702278		115589 KCNMB1 potassium large conductance calcium-activated channel, subfamily M, beta member 1 Hs.93841 AA029299 3779
1737	G_49289	-0.30308	-0.63333	0.702114		220665 Homo sapiens mRNA; cDNA DKFZp667E1121 (from clone DKFZp667E1121) Hs.58210 H15650
4357	G_1732922	0.43634	0.55	0.702063		313912 Homo sapiens mRNA; cDNA DKFZp762H106 (from clone DKFZp762H106) Hs.140978 AI190817
5041	G_884531	-0.4564	-0.53333	0.701956		226353 UMP-CMPK UMP-CMP kinase Hs.11463 AA629801 51727
143	G_753076	-0.6057	-0.35417	0.701647		117743 LOC54518 similar to proline-rich protein 48 Hs.98874 AA436479 54518
4704	G_1751004	-0.57617	-0.4	0.701407		307077 Homo sapiens mRNA; cDNA DKFZp667I137 (from clone DKFZp667I137) Hs.355279 AI140978
1756	G_147925	0.66141	0.23333	0.70136		220107 Homo sapiens cDNA FLJ30478 fis, clone BRAWH1000167 Hs.298258 R81987
1239	G_502791	0.58731	0.38333	0.701338		220379 ZAK sterile alpha motif and leucine zipper containing kinase AZK Hs.115175 AA126914 51776
232	G_1909210	0.58725	0.38333	0.701288		313703 ESTs, Weakly similar to Z195_HUMAN Zinc finger protein 195 [H.sapiens] Hs.128151 AI267867
1610	G_665373	0.43477	0.55	0.701088		103260 TRIM38 tripartite motif-containing 38 Hs.59545 AA194970 10475
525	G_683569	-0.49089	-0.5	0.700695		309686 ITPR1 inositol 1,4,5-triphosphate receptor, type 1 Hs.198443 AA215397 3708
5094	G_448885	-0.58632	-0.38333	0.700509		222454 LOC128439 hypothetical gene LOC128439 Hs.16936 AA777670 128439
3228	G_1671108	-0.61577	-0.33333	0.700201		162098 ESTs Hs.99597 AI075256 Similar to proto-oncogene Wnt-3
895	G_68667	-0.65402	-0.25	0.700173		107048 Homo sapiens cDNA: FLJ22050 fis, clone HEP09454 Hs.173705 T49854
3652	G_358643	0.43311	0.55	0.70006		103709 FARSL phenylalanine-tRNA synthetase-like Hs.23111 W96450 2193
4488	G_435736	-0.3869	-0.58333	0.699975		222887 Homo sapiens cDNA FLJ25677 fis, clone TST04054 Hs.348762 AA700772
313	G_132711	0.50615	0.48333	0.699854		245567 KLF5 Kruppel-like factor 5 (intestinal) Hs.84728 R27011 Human mRNA for GC-Box binding protein BTEB2 complete cds 688
526	G_199367	-0.54924	-0.43333	0.6996		106310 SERPINE2 serine (or cysteine) proteinase inhibitor, clade E (nexin, plasminogen activator inhibitor type 1), member 2 Hs.21858 R95691 5270
2374	G_855487	-0.45251	-0.53333	0.699433		102455 ASAH1 N-acylsphingosine amidohydrolase (acid ceramidase) 1 Hs.75811 AA664155 427
1413	G_295843	0.43153	0.55	0.699084		103090 CYP27A1 cytochrome P450, subfamily XXVIIA (steroid 27-hydroxylase, cerebrotendinous xanthomatosis), polypeptide 1 Hs.82568 N66957 1593
741	G_342378	-0.50484	-0.48333	0.698907		118321 DUSP5 dual specificity phosphatase 5 Hs.2128 W65460 Dual specificity phosphatase induced by serum stimulation an 1847
3483	G_853368	0.45064	0.53333	0.698224		120428 TYMS thymidylate synthetase Hs.82962 AA663310 7298
2883	G_824895	-0.54696	-0.43333	0.697811		112905 PDZ-GEF1 PDZ domain containing guanine nucleotide exchange factor(GEF)1 Hs.154545 AA488900 9693
3248	G_176461	0.5183	0.46667	0.697435		119622 H43515
1210	G_812008	-0.42871	-0.55	0.697347		107540 MRVI1 murine retrovirus integration site 1 homolog Hs.251385 AA455877 10335
4061	G_525926	0.4062	0.56667	0.697218		119785 SDC1 syndecan 1 Hs.82109 AA074511 6382
4391	G_234444	0.68057	0.15	0.696904		114302 RPS8 ribosomal protein S8 Hs.151604 H94812 6202
1569	G_796284	-0.65013	-0.25	0.696541		120339 IRS1 insulin receptor substrate 1 Hs.96063 AA460841 IRS-1=Insulin receptor substrate-1 3667
4596	G_263002	0.55781	0.41667	0.696251		110466 RAGD Rag D protein Hs.238679 H99738 58528
97	G_50772	-0.44744	-0.53333	0.696163		223141 MGC3251 hypothetical protein MGC3251 Hs.13467 H16803 83930
772	G_26474	-0.35254	-0.6	0.695905		104414 FOS v-fos FBJ murine osteosarcoma viral oncogene homolog Hs.25647 R12840 c-fos 2353
116	G_1475308	-0.37946	-0.58333	0.695891		223650 ESTs Hs.186607 AA877997
1042	G_307506	-0.35175	-0.6	0.695506		310608 MEIS1 **Meis1, myeloid ecotropic viral integration site 1 homolog (mouse) Hs.170177 N95243 4211
3441	G_814769	0.51559	0.46667	0.695424		224122 FLJ23468 hypothetical protein FLJ23468 Hs.38178 AA454949 79682
1972	G_299154	-0.28644	-0.63333	0.695093		105324 PIGK phosphatidylinositol glycan, class K Hs.62187 N70544 10026
4308	G_53103	0.42485	0.55	0.69498		104070 ESTs Hs.141027 R15794
1683	G_49687	-0.63454	-0.28333	0.694922		120797 ADRBK2 adrenergic, beta, receptor kinase 2 Hs.13944 H15249 157
2343	G_1698924	-0.377	-0.58333	0.694552		315243 MRPS22 mitochondrial ribosomal protein S22 Hs.107127 AI174328 56945
2545	G_595586	-0.37649	-0.58333	0.694276		102231 ESTs Hs.188682 AA167062
4484	G_307244	-0.5285	-0.45	0.694127		118664 ESTs Hs.55118 N95187
4415	G_1570281	0.64084	0.26667	0.69411		309775 JDP2 jun dimerization protein 2 Hs.154095 AA932870 122953
1814	G_743230	-0.48128	-0.5	0.693996		109489 MEN1 multiple endocrine neoplasia I Hs.240443 AA400234 4221
3221	G_645565	0.55497	0.41667	0.693978		226302 FLJ20354 hypothetical protein FLJ20354 Hs.133260 AA204830 55635
3054	G_197856	0.52822	0.45	0.693914		101560 LOC115004 hypothetical protein BC012928 Hs.344080 R96208 115004
134	G_796198	-0.40037	-0.56667	0.693838		98374 EFNB2 ephrin-B2 Hs.30942 AA461108 1948
4284	G_813742	0.44379	0.53333	0.693823		106095 PTK7 **PTK7 protein tyrosine kinase 7 Hs.90572 AA453789 Protein-tyrosine kinase 7 and KIAA0370 (Double hit) 5754
4593	G_413300	-0.69184	0.05	0.693644		223927 AA772497
2477	G_1034558	-0.42165	-0.55	0.693029		314278 AA779783
2269	G_133717	-0.42153	-0.55	0.692956		226577 TRAP150 thyroid hormone receptor-associated protein, 150 kDa subunit Hs.108319 R27767 9967
2086	G_210862	-0.46172	-0.51667	0.692916		103776 ACOX1 acyl-Coenzyme A oxidase 1, palmitoyl Hs.379991 H65659 51
2674	G_2313852	-0.44219	-0.53333	0.692801		316309 HERPUD1 homocysteine-inducible, endoplasmic reticulum stress-inducible, ubiquitin-like domain member 1 Hs.146393 AI675465 9709
3966	G_2067059	0.66802	0.18333	0.69272		108167 PEG10 paternally expressed 10 Hs.137476 AI378946 23089
2916	G_233071	0.51186	0.46667	0.692663		106250 TMEM2 transmembrane protein 2 Hs.160417 H75632 23670
3155	G_246786	0.68683	-0.08333	0.691867		116170 RDC1 G protein-coupled receptor Hs.23016 N53172 RDC1=orphan G protein-coupled receptor 57007
2675	G_155227	-0.52538	-0.45	0.691754		113234 TUFM **Tu translation elongation factor, mitochondrial Hs.12084 AI732288 7284
3932	G_277426	-0.67872	-0.13333	0.691692		113416 TP53TG1 TP53 target gene 1 Hs.274329 N47733 11257
1143	G_377731	-0.63804	-0.26667	0.691526		111124 GSTM5 glutathione S-transferase M5 Hs.75652 AA056231 2949
282	G_1461100	0.5755	0.38333	0.691478		221117 KIAA1764 KIAA1764 protein Hs.193115 AA867983 85444
5070	G_1638454	0.60569	0.33333	0.691353		308962 ESTs, Weakly similar to T12486 hypothetical protein DKFZp566H033.1 - human [H.sapiens] Hs.131029 AI015936
3239	G_969854	-0.52468	-0.45	0.691223		119251 CALM3 calmodulin 3 (phosphorylase kinase, delta) Hs.334330 AA663828 808
1237	G_897884	0.50952	0.46667	0.690935		120564 KIAA1573 KIAA1573 protein Hs.24790 AA598639 57685
3645	G_859761	-0.49369	-0.48333	0.690896		310025 PVRL2 poliovirus receptor-related 2 (herpesvirus entry mediator B) Hs.183986 AA668508 5819
512	G_265060	0.6849	0.08333	0.689951		99028 KIT v-kit Hardy-Zuckerman 4 feline sarcoma viral oncogene homolog Hs.81665 N20798 c-kit=SCF receptor 3815
4422	G_2028725	-0.47531	-0.5	0.689869		308621 ACK1 activated p21cdc42Hs kinase Hs.153937 AI262140 10188
2995	G_825787	-0.39329	-0.56667	0.689777		308867 NUP98 nucleoporin 98kDa Hs.112255 AA491315 4928
914	G_506143	0.65939	-0.2	0.689054		223115 SCHIP1 schwannomin interacting protein 1 Hs.61490 AA708955 29970
360	G_279873	0.39193	0.56667	0.689002		224567 ESTs Hs.45105 N40997
1791	G_767469	-0.47369	-0.5	0.688754		104700 ANKH **ankylosis, progressive homolog (mouse) Hs.168640 AA418007 56172
4926	G_454698	-0.49003	-0.48333	0.688286		224908 FZD4 frizzled homolog 4 (Drosophila) Hs.19545 AA677200 8322
3147	G_418193	0.52056	0.45	0.688101		102573 COL1A1 collagen, type I, alpha 1 Hs.172928 W90359 1277
2525	G_50480	-0.48959	-0.48333	0.687973		118005 ARG2 arginase, type II Hs.172851 H17612 384
2836	G_700527	-0.43445	-0.53333	0.687886		119952 GLRX glutaredoxin (thioltransferase) Hs.28988 AA283864 2745
849	G_1032831	0.68264	-0.08333	0.687707		224335 LOC83468 gycosyltransferase Hs.159993 AA628462 83468
735	G_253141	-0.54708	-0.41667	0.687685		100283 ARHB ras homolog gene family, member B Hs.204354 H88963 388
5081	G_1881612	-0.38942	-0.56667	0.687578		311630 HSPC196 hypothetical protein HSPC196 Hs.22546 AI290663 51524
2238	G_209246	-0.56997	-0.38333	0.686883		109502 EIF3S6IP eukaryotic translation initiation factor 3, subunit 6 interacting protein Hs.119503 H63706 51386
671	G_297895	-0.41118	-0.55	0.686709		103316 LST1 leukocyte specific transcript 1 Hs.380427 N70057 7940
2954	G_700967	-0.56974	-0.38333	0.686692		225941 LOC64116 up-regulated by BCG-CWS Hs.284205 AA287827 64116
2987	G_2504927	-0.58059	-0.36667	0.686682		330354 TFF1 trefoil factor 1 (breast cancer, estrogen-inducible sequence expressed in) Hs.350470 AW009769 7031
2137	G_788493	-0.43233	-0.53333	0.686549		118822 TRAM translocating chain-associating membrane protein Hs.4147 AA452556 23471
4319	G_297731	0.63902	0.25	0.686183		105061 ZNF273 zinc finger protein 273 Hs.290768 N69908 10793
2813	G_470159	-0.46936	-0.5	0.685783		109276 CYP1B1 cytochrome P450, subfamily I (dioxin-inducible), polypeptide 1 (glaucoma 3, primary infantile) Hs.154654 AA029776 1545
3628	G_705274	-0.65063	-0.21667	0.685759		105763 DGKD diacylglycerol kinase, delta 130kDa Hs.115907 AA280691 Diacylglycerol kinase delta 8527
1362	G_773575	-0.50227	-0.46667	0.685606		103920 Homo sapiens cDNA FLJ39992 fis, clone STOMA2001025, moderately similar to Homo sapiens RNA-binding protein (RBMS3) mRNA Hs.126083 AA428240
3140	G_250654	-0.29886	-0.61667	0.685273		115502 SPARC **secreted protein, acidic, cysteine-rich (osteonectin) Hs.111779 H95959 6678
904	G_1558492	0.67213	0.13333	0.685227		226972 AIP1 atrophin-1 interacting protein 1; activin receptor interacting protein 1 Hs.22599 AA976171 9863
4713	G_897625	-0.51664	-0.45	0.68514		104581 SFRS4 **splicing factor, arginine/serine-rich 4 Hs.76122 AA496736 6429
3450	G_435076	0.60727	0.31667	0.684877		115397 CENPF centromere protein F, 350/400ka (mitosin) Hs.77204 AA701455 1063
101	G_40338	0.54309	0.41667	0.684515		99128 CNTNAP2 contactin associated protein-like 2 Hs.106552 R53072 26047
1516	G_858761	-0.48418	-0.48333	0.684133		225964 Homo sapiens cDNA FLJ30740 fis, clone FEBRA2000319 Hs.122593 AA779048
2402	G_754280	-0.38311	-0.56667	0.684024		112780 Homo sapiens cDNA FLJ36515 fis, clone TRACH2001810 Hs.33905 AA479284
2474	G_1650597	-0.48376	-0.48333	0.683836		307988 KIAA0483 KIAA0483 protein Hs.64691 AI023946 23219
4510	G_1055146	-0.49958	-0.46667	0.683638		226994 ESTs Hs.112981 AA621364
632	G_39833	-0.54184	-0.41667	0.683524		221306 CPVL carboxypeptidase, vitellogenic-like Hs.95594 R53455 54504
625	G_183337	-0.35593	-0.58333	0.683345		113414 HLA-DMA major histocompatibility complex, class II, DM alpha Hs.77522 H42679 MHC Class II=DM alpha 3108
96	G_1493252	-0.58684	-0.35	0.683287		226211 FLJ11200 hypothetical protein FLJ11200 Hs.107381 AA886870 55325
3708	G_343490	0.32598	0.6	0.682835		115641 CBX3 chromobox homolog 3 (HP1 gamma homolog, Drosophila) Hs.278554 W69106 11335
4135	G_1669232	0.32583	0.6	0.682763		308694 MSLN mesothelin Hs.155981 AI056417 10232
2481	G_281639	-0.48223	-0.48333	0.682754		221104 GPR107 G protein-coupled receptor 107 Hs.6639 N48009 57720
4000	G_340949	-0.51347	-0.45	0.682753		118465 KIAA1014 KIAA1014 protein Hs.6834 W57818 23360
2132	G_795821	-0.44616	-0.51667	0.682647		116878 MGC3067 **hypothetical protein MGC3067 Hs.323114 AA460577 79139
2423	G_320834	-0.48193	-0.48333	0.682543		109882 UBE4B ubiquitination factor E4B (UFD2 homolog, yeast) Hs.24594 W38657 10277
5130	G_502625	0.29224	0.61667	0.682412		101195 GALNT12 hypothetical protein FLJ21212 Hs.47099 AA134576 79695
3480	G_815501	0.52669	0.43333	0.682039		113682 MGC2721 hypothetical protein MGC2721 Hs.76084 AA456868 84823
5075	G_629907	-0.49683	-0.46667	0.681631		114499 ESTs, Weakly similar to hypothetical protein FLJ20378 [Homo sapiens] [H.sapiens] Hs.86815 AA219229
4396	G_193892	0.66491	0.15	0.68162		118015 PEG10 paternally expressed 10 Hs.137476 H51765 23089
738	G_789383	-0.52556	-0.43333	0.681167		107855 CREM cAMP responsive element modulator Hs.155924 AA453347 1390
2001	G_814017	-0.25016	-0.63333	0.680946		185780 Homo sapiens cDNA FLJ13207 fis, clone NT2RP4000023 Hs.14355 AA455668 Unknown sc_id2276
2096	G_264400	-0.46218	-0.5	0.680889		106055 Homo sapiens cDNA: FLJ23472 fis, clone HSI12131 Hs.283575 N21217
1295	1239995	0.60267	-0.31667	0.680802		223485 VIK vav-1 interacting Kruppel-like protein Hs.115659 AA706738 79027
4881	G_283617	-0.67555	-0.08333	0.68067		104869 Homo sapiens cDNA FLJ25252 fis, clone STM03814 Hs.16979 N52875
4057	G_344937	0.58353	0.35	0.680446		226289 MGC10986 hypothetical protein MGC10986 Hs.50601 W72885 80774
2059	G_951313	-0.2473	-0.63333	0.6799		116840 Homo sapiens, clone MGC:24463 IMAGE:4082362, mRNA, complete cds Hs.352398 AA620591
1990	G_786202	-0.42097	-0.53333	0.679453		105121 **Homo sapiens cDNA FLJ38834 fis, clone MESAN2001450, weakly similar to Drosophila melanogaster Dispatched (dispatched) mRNA Hs.355645 AA448690
1320	G_41684	-0.3746	-0.56667	0.679294		313394 HLF hepatic leukemia factor Hs.250692 R59192 3131
4403	G_1034472	0.58185	0.35	0.679006		225004 Homo sapiens cDNA FLJ10728 fis, clone NT2RP3001236 Hs.167135 AA779718
2033	G_884606	-0.41977	-0.53333	0.67871		221650 Homo sapiens cDNA: FLJ21288 fis, clone COL01927 Hs.6019 AA630006
5151	G_365004	-0.47483	-0.48333	0.677548		110648 Homo sapiens mRNA; cDNA DKFZp586I0324 (from clone DKFZp586I0324) Hs.193700 AA024788
4959	G_1048810	-0.5205	-0.43333	0.67727		105721 DKFZP564B167 DKFZP564B167 protein Hs.76285 AA621342 25874
2654	G_285040	-0.64694	-0.2	0.677149		113278 GLUD1 glutamate dehydrogenase 1 Hs.77508 N63375 2746
264	G_49524	0.6562	0.16667	0.677036		224539 FLJ21924 hypothetical protein FLJ21924 Hs.143509 H15325 79832
2255	G_25778	-0.39464	-0.55	0.676935		220422 FBXL3A F-box and leucine-rich repeat protein 3A Hs.7540 R12337 26224
428	G_878277	0.65609	0.16667	0.676929		226643 Homo sapiens BM32A mRNA for PMMLP, complete cds Hs.26612 AA775810
2635	G_971276	-0.41667	-0.53333	0.676797		109160 RAP1GA1 RAP1, GTPase activating protein 1 Hs.75151 AA682897 5909
2411	G_1625945	-0.41637	-0.53333	0.676613		317885 NDRG3 NDRG family member 3 Hs.355855 AI004026 57446
4708	G_489722	-0.48977	-0.46667	0.676502		226659 KIAA0977 KIAA0977 protein Hs.300855 AA099593 22837
1300	G_868168	-0.31164	-0.6	0.676106		223892 SPRR2A small proline-rich protein 2A Hs.11261 AA633825 6700
3917	G_1911334	-0.56789	-0.36667	0.675978		318423 MGC3165 similar to H2A histone family, member A (H. sapiens) Hs.348495 AI268551 92815
4915	G_1534888	-0.64027	-0.21667	0.675938		308201 TNFRSF21 tumor necrosis factor receptor superfamily, member 21 Hs.159651 AA918818 27242
1017	G_753982	-0.36774	-0.56667	0.675535		102526 ESTs, Weakly similar to hypothetical protein FLJ20378 [Homo sapiens] [H.sapiens] Hs.7882 AA478747
5019	G_771911	-0.56703	-0.36667	0.675255		107068 PAEP progestagen-associated endometrial protein (placental protein 14, pregnancy-associated endometrial alpha-2-globulin, alpha uterine protein) Hs.82269 AA470614 5047
4883	G_470216	-0.58677	-0.33333	0.674839		112850 MYO6 **myosin VI Hs.22564 AA028987 4646
144	G_452374	-0.60435	-0.3	0.674714		109674 ORM2 orosomucoid 2 Hs.278388 AA700876 5005
455	G_341083	-0.55515	-0.38333	0.674636		103578 ESTs Hs.323117 W58562
3999	G_200263	0.23179	0.63333	0.674413		108958 APOA1 apolipoprotein A-I Hs.93194 R96780 335
890	G_726779	-0.65324	-0.16667	0.674167		107127 CNN1 calponin 1, basic, smooth muscle Hs.21223 AA398400 1264
2630	G_377898	-0.38824	-0.55	0.673224		224483 ESTs, Weakly similar to A25707 U1 snRNP 70K protein - human [H.sapiens] Hs.356151 AA777098
3583	G_795274	0.38811	0.55	0.673149		111021 FLJ31528 hypothetical protein FLJ31528 Hs.66219 AA454012 146705
4040	G_2254846	0.36273	0.56667	0.672821		311223 PIASY protein inhibitor of activated STAT protein PIASy Hs.105779 AI620179 51588
4849	G_283258	-0.62462	-0.25	0.672793		227102 ATP11B ATPase, Class VI, type 11B Hs.75478 N51394 23200
3830	G_742979	0.38718	0.55	0.672613		99690 DKFZP761I2123 **KIAA1886 protein Hs.77978 AA405740 83637
1396	G_32567	0.6173	0.26667	0.672437		220989 ID4 inhibitor of DNA binding 4, dominant negative helix-loop-helix protein Hs.34853 R20393 3400
4769	G_812965	-0.64173	-0.2	0.672174		114028 MYC v-myc myelocytomatosis viral oncogene homolog (avian) Hs.79070 AA464600 c-myc 4609
4365	G_276904	0.51346	0.43333	0.671875		222127 MGC12458 hypothetical protein MGC12458 Hs.330664 N34939 84288
4834	G_292515	-0.38589	-0.55	0.671871		114839 UAP1 UDP-N-acteylglucosamine pyrophosphorylase 1 Hs.21293 N68465 6675
2702	G_165857	-0.52702	-0.41667	0.671836		107393 INPP4B inositol polyphosphate-4-phosphatase, type II, 105kDa Hs.153687 R86720 8821
3435	G_431242	0.58324	0.33333	0.671772		224008 FLJ25211 hypothetical protein FLJ25211 Hs.44269 AA682533 151246
4200	G_260757	0.65831	0.13333	0.671676		115260 FLJ22116 hypothetical protein FLJ22116 Hs.34497 H97215 79677
2323	G_839698	-0.51306	-0.43333	0.671569		111703 FBXO8 F-box only protein 8 Hs.76917 AA504858 26269
2152	G_141508	-0.33253	-0.58333	0.671454		308088 FLJ13397 hypothetical protein FLJ13397 Hs.285107 R72972 80013
3473	G_1536451	0.49781	0.45	0.671055		307205 ESTs Hs.126714 AA919126
2396	G_665127	-0.52588	-0.41667	0.670942		114078 MGC13523 hypothetical protein MGC13523 Hs.26771 AA194966 112611
476	G_1585327	-0.62852	-0.23333	0.670433		307146 AXIN2 axin 2 (conductin, axil) Hs.127337 AA976642 8313
2237	G_266483	-0.35815	-0.56667	0.670363		109016 Homo sapiens mRNA; cDNA DKFZp586K2322 (from clone DKFZp586K2322) Hs.343411 N22684
2129	G_1837161	-0.32993	-0.58333	0.67017		312433 RNP24 coated vesicle membrane protein Hs.75914 AI208335 10959
186	G_125134	-0.35759	-0.56667	0.670064		118132 Homo sapiens, similar to B-lymphocyte activation marker BLAST-1 precursor (BCM1 surface antigen) (Leucocyte antigen MEM-102) (TCT.1) (Antigen CD48), clone MGC:34616 IMAGE:5223308, mRNA, complete cds Hs.352135 R05415 CD48=BLAST-1
4452	G_50114	0.49632	0.45	0.66995		102664 PCDHA10 protocadherin alpha 10 Hs.247735 H16743 56139
3178	G_782513	-0.26166	-0.61667	0.669886		111545 G1P3 interferon, alpha-inducible protein (clone IFI-6-16) Hs.265827 AA432030 2537
4831	G_321386	-0.64844	-0.16667	0.669517		112907 IQGAP2 IQ motif containing GTPase activating protein 2 Hs.78993 W32272 10788
1699	G_701579	-0.56012	-0.36667	0.669463		187171 **Homo sapiens cDNA FLJ33929 fis, clone CTONG2017458, moderately similar to Homo sapiens mRNA for vascular Rab-GAP/TBC-containing protein Hs.13012 AA284464 Unknown UG Hs.13012 ESTs
2718	G_1582738	-0.52393	-0.41667	0.669415		310047 BM040 uncharacterized bone marrow protein BM040 Hs.26892 AA971970 55840
3808	G_256664	0.44508	0.5	0.6694		115328 H2AFX H2A histone family, member X Hs.147097 H95392 3014
2869	G_682045	-0.40449	-0.53333	0.669368		112117 STARD13 START domain containing 13 Hs.13649 AA256386 90627
1717	G_154769	-0.4798	-0.46667	0.66932		99385 Homo sapiens cDNA: FLJ20895 fis, clone ADKA03483 Hs.285737 R55630
1370	G_37820	-0.52331	-0.41667	0.66893		224508 **ESTs, Weakly similar to hypothetical protein FLJ11267 [Homo sapiens] [H.sapiens] Hs.374422 R59359
1778	G_269663	-0.29474	-0.6	0.668485		106645 ESTs, Moderately similar to REL_HUMAN C-Rel proto-oncogene protein (C-Rel protein) [H.sapiens] Hs.48527 N24785
965	G_303112	-0.32573	-0.58333	0.668112		108561 SOCS5 suppressor of cytokine signaling 5 Hs.169836 N90775 9655
1122	G_297604	0.59681	0.3	0.667969		101131 Homo sapiens mRNA; cDNA DKFZp586J2118 (from clone DKFZp586J2118) Hs.21851 N69835
1201	G_489519	-0.3251	-0.58333	0.667805		105887 TIMP3 tissue inhibitor of metalloproteinase 3 (Sorsby fundus dystrophy, pseudoinflammatory) Hs.245188 AA099153 7078
2060	G_144977	-0.32495	-0.58333	0.667732		112153 JWA vitamin A responsive; cytoskeleton related Hs.92384 R78724 10550
3345	G_739511	0.37793	0.55	0.667331		103518 PKMYT1 membrane-associated tyrosine- and threonine-specific cdc2-inhibitory kinase Hs.77783 AA478066 Myt1 kinase 9088
3699	G_1597388	0.47596	0.46667	0.666572		222882 ZFP36 zinc finger protein 36, C3H type, homolog (mouse) Hs.343586 AA973224 7538
2699	G_813513	-0.37646	-0.55	0.6665		101948 INPP4B **inositol polyphosphate-4-phosphatase, type II, 105kDa Hs.153687 AA455597 8821
3383	G_487327	0.4589	0.48333	0.666481		109858 LOC51673 brain specific protein Hs.279772 AA045524 51673
1505	G_66599	0.42058	0.51667	0.66621		111103 NAT1 N-acetyltransferase 1 (arylamine N-acetyltransferase) Hs.155956 T67128 9
1291	G_1474900	0.47531	0.46667	0.666108		224826 KRT15 keratin 15 Hs.80342 AA878048 3866
3710	G_1862569	0.37556	0.55	0.665992		114921 TCOF1 Treacher Collins-Franceschetti syndrome 1 Hs.301266 AI053410 6949
648	G_549933	-0.34976	-0.56667	0.665918		99186 IL8 interleukin 8 Hs.624 AA082747 3576
3158	G_823575	0.63504	0.2	0.66579		100413 FLJ10392 **hypothetical protein FLJ10392 Hs.20887 AA497044 55704
4810	G_490178	-0.57612	-0.33333	0.6656		99246 PPP3CA **protein phosphatase 3 (formerly 2B), catalytic subunit, alpha isoform (calcineurin A alpha) Hs.272458 AA121266 5530
4192	G_23903	-0.37449	-0.55	0.665389		102495 Homo sapiens mRNA; cDNA DKFZp667J212 (from clone DKFZp667J212) Hs.12526 R39528
1456	G_770957	-0.39681	-0.53333	0.664755		116828 DPYD dihydropyrimidine dehydrogenase Hs.1602 AA428170 Dihydropyrimidine dehydrogenase 1806
3730	G_897570	-0.63836	-0.18333	0.664164		105122 TRAP1 heat shock protein 75 Hs.182366 AA489602 10131
2039	G_1630411	-0.28464	-0.6	0.664093		307532 AA984759
1526	G_271198	-0.34571	-0.56667	0.6638		113063 NR3C1 nuclear receptor subfamily 3, group C, member 1 (glucocorticoid receptor) Hs.75772 N30428 Glucocorticoid receptor 2908
4227	G_149809	-0.65023	0.13333	0.663759		178003 MGC2306 hypothetical protein MGC2306 Hs.760 H00625 GATA-binding protein 2 84724
2207	G_427980	-0.47195	-0.46667	0.663715		113956 ZNF262 zinc finger protein 262 Hs.150390 AA001835 9202
100	G_256477	0.47172	0.46667	0.663552		102361 CNTNAP2 contactin associated protein-like 2 Hs.106552 H94745 26047
5100	G_845435	-0.47167	-0.46667	0.663516		221800 ESTs, Weakly similar to hypothetical protein FLJ20489 [Homo sapiens] [H.sapiens] Hs.55028 AA644547
4421	G_2018758	-0.41593	-0.51667	0.663284		309105 PEX7 peroxisomal biogenesis factor 7 Hs.79993 AI360264 5191
4084	G_757034	-0.60658	-0.26667	0.66261		101658 AA429215
99	G_39204	0.5398	0.38333	0.662062		113744 CNTNAP2 contactin associated protein-like 2 Hs.106552 R51354 26047
362	G_823679	-0.39207	-0.53333	0.661936		113788 C18orf1 chromosome 18 open reading frame 1 Hs.153498 AA489633 753
1607	G_110060	-0.52733	-0.4	0.661874		248122 ESTs Moderately similar to NBL4 PROTEIN [M.musculus]
4804	G_150314	-0.45174	-0.48333	0.661572		115932 LYPLA1 lysophospholipase I Hs.12540 H00817 10434
2695	G_137984	-0.46885	-0.46667	0.661514		114686 LOC51159 colon carcinoma related protein Hs.30343 R63085 51159
3592	G_810124	0.4683	0.46667	0.661125		106094 PAFAH1B3 platelet-activating factor acetylhydrolase, isoform Ib, gamma subunit 29kDa Hs.6793 AA464238 5050
3218	G_771165	0.27752	0.6	0.661073		101775 YEA YEA4 protein Hs.292566 AA429474 84912
1260	G_1560599	-0.53857	-0.38333	0.661059		315299 Homo sapiens mRNA; cDNA DKFZp564P016 (from clone DKFZp564P016) Hs.132571 AA947186
220	G_1658257	-0.64999	-0.11667	0.660378		317229 KIAA1579 hypothetical protein FLJ10770 Hs.49933 AI039422 55225
5024	G_744036	-0.5374	-0.38333	0.660107		223808 FBXO25 F-box only protein 25 Hs.81001 AA629247 26260
4228	G_135688	-0.52457	-0.4	0.659677		116521 MGC2306 hypothetical protein MGC2306 Hs.760 R32405 84724
4509	G_1534008	-0.36402	-0.55	0.659553		307684 FLJ20152 hypothetical protein FLJ20152 Hs.82273 AA918685 54463
4552	G_1564513	-0.44733	-0.48333	0.658568		307198 KIAA1349 KIAA1349 protein Hs.127656 AA961282 57547
1238	G_195110	0.52244	0.4	0.657984		310988 ZAK sterile alpha motif and leucine zipper containing kinase AZK Hs.115175 R91154 51776
4974	G_841141	-0.60814	-0.25	0.657521		118377 TMEPAI transmembrane, prostate androgen induced RNA Hs.83883 AA486591 56937
3945	G_429305	-0.58479	-0.3	0.657251		110701 Homo sapiens mRNA full length insert cDNA clone EUROIMAGE 2004433 Hs.284298 AA007325
1098	G_471855	-0.38381	-0.53333	0.657078		102662 AA035657
662	G_839594	-0.44482	-0.48333	0.656866		106429 LTBP1 latent transforming growth factor beta binding protein 1 Hs.241257 AA490011 4052
1794	G_2055010	-0.49355	-0.43333	0.656785		318836 PBEF pre-B-cell colony-enhancing factor Hs.239138 AI335002 10135
4863	G_259374	-0.54478	-0.36667	0.656683		105485 MCCC2 methylcrotonoyl-Coenzyme A carboxylase 2 (beta) Hs.167531 N31952 64087
1347	G_1703455	0.57522	0.31667	0.656626		310152 EDG2 endothelial differentiation, lysophosphatidic acid G-protein-coupled receptor, 2 Hs.75794 AI161252 1902
1178	G_2566009	-0.26665	-0.6	0.656584		331038 TIMP2 tissue inhibitor of metalloproteinase 2 Hs.6441 AW005791 7077
4617	G_840878	0.26641	0.6	0.656486		106756 DHCR24 24-dehydrocholesterol reductase Hs.75616 AA482228 1718
204	G_754379	0.3827	0.53333	0.65643		113648 ESTs, Weakly similar to I49130 reverse transcriptase - mouse [M.musculus] Hs.37751 AA436174
1989	G_998080	-0.40475	-0.51667	0.656331		116241 RNP24 coated vesicle membrane protein Hs.75914 AA533653 10959
3653	G_1893899	-0.57474	-0.31667	0.656206		312021 ESTs Hs.369728 AI280304
4681	G_253994	-0.40454	-0.51667	0.656202		105869 Homo sapiens, Similar to zinc finger protein 91 (HPF7, HTF10), clone MGC:26916 IMAGE:4837196, mRNA, complete cds Hs.180546 N22297
3167	G_233277	-0.33039	-0.56667	0.655952		115461 ESTs, Weakly similar to hypothetical protein FLJ20378 [Homo sapiens] [H.sapiens] Hs.270149 H77493
1261	G_273048	-0.53208	-0.38333	0.655783		103627 MBLL39 **muscleblind-like protein MBLL39 Hs.283609 N36402 10150
1019	G_263341	-0.47666	-0.45	0.655519		184398 DKFZP566K1924 DKFZP566K1924 protein Hs.26358 N20003 Unknown UG Hs.26358 ESTs 25927
3336	G_265028	-0.60586	-0.25	0.655413		119675 MATP **AIM-1 protein Hs.278962 N21084 51151
1283	G_487117	-0.16839	-0.63333	0.655334		98915 OGN osteoglycin (osteoinductive factor, mimecan) Hs.109439 AA045327 4969
651	G_241097	-0.40308	-0.51667	0.655303		99474 H80335
3470	G_713127	0.49124	0.43333	0.655051		309085 SMC4L1 SMC4 structural maintenance of chromosomes 4-like 1 (yeast) Hs.50758 AA283006 10051
1880	G_486179	-0.42203	-0.5	0.654301		226102 NFAT5 nuclear factor of activated T-cells 5, tonicity-responsive Hs.86998 AA043254 10725
4004	G_1642496	0.35394	0.55	0.654044		308501 MGC11266 hypothetical protein MGC11266 Hs.293943 AI024683 79172
2192	G_201705	-0.37793	-0.53333	0.65366		117055 R99739
4384	G_325182	0.62631	0.18333	0.65259		109288 CDH2 cadherin 2, type 1, N-cadherin (neuronal) Hs.161 W48793 N-Cadherin=Neural cadherin precursor 1000
3968	G_1709743	-0.61521	-0.21667	0.652249		319168 RALGDS ral guanine nucleotide dissociation stimulator Hs.106185 AI131235 5900
4657	G_701115	0.51518	0.4	0.652235		223777 PRO2013 hypothetical protein PRO2013 Hs.238205 AA287306 58527
1947	G_594973	-0.50164	-0.41667	0.652117		111291 Homo sapiens cDNA FLJ14237 fis, clone NT2RP4000517 Hs.165195 AA171992
3379	G_745318	0.62042	0.2	0.65186		225615 DKFZP761I2123 KIAA1886 protein Hs.77978 AA625583 83637
4560	G_135721	-0.41754	-0.5	0.651414		109697 EST Hs.24595 R33073
3712	G_433162	0.41725	0.5	0.651228		118427 POLE polymerase (DNA directed), epsilon Hs.166846 AA680129 5426
4835	G_685516	-0.43621	-0.48333	0.651066		220886 GPCR1 putative G protein-coupled receptor Hs.97101 AA262573 26996
1956	G_700681	-0.436	-0.48333	0.650925		225333 MBP myelin basic protein Hs.69547 AA283755 4155
4166	G_460180	0.47024	0.45	0.650865		225969 MGC35361 hypothetical protein MGC35361 Hs.351094 AA676938 222234
2413	G_364921	-0.34753	-0.55	0.650597		118651 CTNND1 catenin (cadherin-associated protein), delta 1 Hs.166011 AA024656 1500
1633	G_726599	-0.31958	-0.56667	0.650574		101067 KIAA1223 KIAA1223 protein Hs.28783 AA394303 57182
3941	G_451596	0.31915	0.56667	0.650363		225510 C(27)-3BETA-HSD 3 beta-hydroxy-delta 5-C27-steroid oxidoreductase Hs.23628 AA707080 80270
641	G_757440	-0.28713	-0.58333	0.650167		118393 IL10RA interleukin 10 receptor, alpha Hs.327 AA437226 3587
1252	G_2577882	-0.45267	-0.46667	0.650147		330254 TPM2 tropomyosin 2 (beta) Hs.300772 AW075492 7169
3321	G_703526	0.57675	0.3	0.650108		221788 Homo sapiens, clone IMAGE:5112383, mRNA, partial cds Hs.103104 AA278227
3762	G_415415	-0.64805	-0.05	0.649976		111613 EST, Weakly similar to ribosomal protein L18a; 60S ribosomal protein L18a [Homo sapiens] [H.sapiens] Hs.332217 W78766
857	G_461468	0.39355	0.51667	0.649484		224472 ESTs Hs.163036 AA705029
1202	G_774181	-0.14093	-0.63333	0.648821		104656 TIMP3 tissue inhibitor of metalloproteinase 3 (Sorsby fundus dystrophy, pseudoinflammatory) Hs.245188 AA428406 7078
1007	G_232887	0.64745	0.03333	0.648307		115472 JAM3 junctional adhesion molecule 3 Hs.334703 H73479 83700
1560	G_51395	0.36859	0.53333	0.648305		111053 ESTs, Moderately similar to hypothetical protein FLJ20234 [Homo sapiens] [H.sapiens] Hs.268720 H19414
4377	G_397633	0.59063	0.26667	0.648041		221301 ESTs, Highly similar to CPG2_HUMAN Coatomer gamma-2 subunit (Gamma-2 coat protein) (Gamma-2 COP) [H.sapiens] Hs.313803 AA708268
4050	G_2306697	0.31405	0.56667	0.647875		311078 NMB neuromedin B Hs.83321 AI650675 4828
2131	G_825771	-0.44882	-0.46667	0.647472		226427 CPNE3 copine III Hs.14158 AA491312 8895
4348	G_301740	0.41108	0.5	0.647292		245365 Human XIST, coding sequence "a" mRNA (locus DXS399E) Hs.352403 W17094 Human XIST coding sequence a mRNA (locus DXS399E)
409	G_470393	-0.4304	-0.48333	0.647188		113992 MMP7 matrix metalloproteinase 7 (matrilysin, uterine) Hs.2256 AA031513 4316
1641	G_564849	-0.48021	-0.43333	0.64682		309923 Homo sapiens cDNA FLJ30547 fis, clone BRAWH2001439 Hs.351021 AA129218
246	G_300899	-0.19487	-0.61667	0.646727		108735 GABBR1 gamma-aminobutyric acid (GABA) B receptor, 1 Hs.167017 N80593 2550
3429	G_884364	0.42924	0.48333	0.646417		312789 ESTs, Weakly similar to hypothetical protein FLJ20489 [Homo sapiens] [H.sapiens] Hs.165909 AA629538
1609	G_969495	-0.27793	-0.58333	0.646157		226152 TIGA1 TIGA1 Hs.12082 AA663849 114915
1678	G_1649374	0.27694	0.58333	0.645732		308502 HGD homogentisate 1,2-dioxygenase (homogentisate oxidase) Hs.15113 AI026973 3081
4599	G_35812	0.63791	-0.1	0.645701		104106 PCLO piccolo (presynaptic cytomatrix protein) Hs.12376 R14631 27445
3504	G_1985520	-0.57164	-0.3	0.645579		110301 KIAA0874 KIAA0874 protein Hs.27973 AI251235 23253
288	G_146810	-0.53028	-0.36667	0.644704		308475 ESTs Hs.297352 R80459
4865	G_208082	-0.46128	-0.45	0.644422		113856 FLJ13409 hypothetical protein FLJ13409 Hs.30732 H62563 79670
1292	G_345957	-0.61256	-0.2	0.644383		109053 CSTA cystatin A (stefin A) Hs.2621 W72207 1475
1236	G_2407433	0.64083	0.06667	0.644289		102254 DPYSL3 dihydropyrimidinase-like 3 Hs.74566 AI831083 1809
73	G_784200	-0.61236	-0.2	0.644193		113501 Homo sapiens cDNA FLJ34412 fis, clone HEART2002432 Hs.99083 AA446859
2576	G_502200	-0.46096	-0.45	0.644193		111249 Homo sapiens cDNA FLJ20738 fis, clone HEP08257 Hs.243901 AA125935
4354	G_229560	0.52949	0.36667	0.644055		115668 Homo sapiens mRNA; cDNA DKFZp313K1012 (from clone DKFZp313K1012) Hs.99480 H67282
3001	G_813755	0.49077	0.41667	0.643793		108761 Homo sapiens cDNA FLJ33435 fis, clone BRACE2021344 Hs.293388 AA453815
2285	G_344210	-0.36021	-0.53333	0.643578		222861 PRKAR1A **protein kinase, cAMP-dependent, regulatory, type I, alpha (tissue specific extinguisher 1) Hs.183037 W69805 5573
1704	G_486676	-0.47516	-0.43333	0.64308		112027 LCP1 lymphocyte cytosolic protein 1 (L-plastin) Hs.381099 AA044166 3936
2743	G_299815	-0.42412	-0.48333	0.643029		113824 DC42 hypothetical protein DC42 Hs.72805 N77877 81612
4697	G_854004	-0.33273	-0.55	0.642814		223119 ESTs Hs.191850 AA668900
188	G_1880354	0.3323	0.55	0.642591		312299 ESTs, Highly similar to MPRD_HUMAN Cation-dependent mannose-6-phosphate receptor precursor (CD MAN-6-P receptor) (CD-MPR) (46 KDA mannose 6-phosphate receptor) (MPR 46) [H.sapiens] Hs.134084 AI290482
748	G_154482	-0.47436	-0.43333	0.642489		110746 SERPINB1 serine (or cysteine) proteinase inhibitor, clade B (ovalbumin), member 1 Hs.183583 R54664 1992
1461	G_823864	-0.17868	-0.61667	0.642035		116210 TCN2 transcobalamin II; macrocytic anemia Hs.84232 AA490459 6948
399	G_450533	-0.44058	-0.46667	0.641788		310136 SERPINA3 serine (or cysteine) proteinase inhibitor, clade A (alpha-1 antiproteinase, antitrypsin), member 3 Hs.234726 AA704242 12
4953	G_2490659	-0.63393	-0.1	0.641769		330845 H2BFB H2B histone family, member B Hs.180779 AI972946 3017
3384	G_45728	0.51463	0.38333	0.641705		120684 DKFZp762A2013 hypothetical protein DKFZp762A2013 Hs.309165 H08427 169714
2540	G_280763	-0.17698	-0.61667	0.641564		109573 ESTs, Weakly similar to NUCL_HUMAN Nucleolin (Protein C23) [H.sapiens] Hs.30120 N50563
4229	G_501880	-0.63078	0.11667	0.641479		310413 UQCR ubiquinol-cytochrome c reductase (6.4kD) subunit Hs.8372 AA129901 10975
4768	G_1374442	-0.51421	-0.38333	0.641369		115116 EST Hs.336887 AA829061
4669	mitoch_G_245272	0.42125	0.48333	0.641139		433338 *mitoch. cont. ESTs
4523	G_261194	-0.50082	-0.4	0.640953		106874 PRO1489 hypothetical protein PRO1489 Hs.197922 H98215 55450
2919	G_1742986	0.60306	0.21667	0.640802		310679 SLAC2-B SLAC2-B Hs.138380 AI193238 23086
355	G_85541	0.48673	0.41667	0.640718		115590 STAT6 signal transducer and activator of transcription 6, interleukin-4 induced Hs.181015 T72202 6778
1272	G_365826	-0.52517	-0.36667	0.640508		115019 GAS1 growth arrest-specific 1 Hs.65029 AA025819 2619
2971	G_321706	-0.52428	-0.36667	0.639778		115988 KIAA1467 KIAA1467 protein Hs.6189 W33011 57613
1307	G_298899	-0.32626	-0.55	0.639489		247267 GBP2 guanylate binding protein 2, interferon-inducible Hs.171862 W01896 ESTs Highly similar to INTERFERON-INDUCED GUANYLATE-BINDIN 2634
3982	G_177419	-0.56473	-0.3	0.639469		310370 SH3GLB2 **SH3-domain GRB2-like endophilin B2 Hs.30002 H42583 56904
2942	G_1015874	0.60126	0.21667	0.639108		120553 BARD1 BRCA1 associated RING domain 1 Hs.54089 AA558464 580
956	G_853998	-0.48452	-0.41667	0.639041		221713 EVA1 epithelial V-like antigen 1 Hs.116651 AA668897 10205
4413	G_292482	0.48433	0.41667	0.638897		120231 ESTs, Moderately similar to cytokine receptor-like factor 2; cytokine receptor CRL2 precusor [Homo sapiens] [H.sapiens] Hs.14248 N62588
2665	G_897807	-0.53412	-0.35	0.63858		223856 FECH ferrochelatase (protoporphyria) Hs.26 AA598531 2235
4924	G_41305	-0.51066	-0.38333	0.638526		222786 DKFZP434D146 DKFZP434D146 protein Hs.240845 R56723 26084
2860	G_344251	-0.3503	-0.53333	0.638084		113084 C20orf31 chromosome 20 open reading frame 31 Hs.93871 W73745 55741
4289	G_248829	-0.46779	-0.43333	0.637654		311177 LOX lysyl oxidase Hs.102267 H80736 4015
4611	G_1882870	-0.4964	-0.4	0.637505		309437 AI279445
349	G_79217	-0.21391	-0.6	0.636991		105646 ESTs Hs.10263 T57773
2373	G_859912	-0.39411	-0.5	0.63665		225794 TDE1 tumor differentially expressed 1 Hs.272168 AA679489 10955
4855	G_263247	-0.46606	-0.43333	0.636386		224255 CRYL1 crystallin, lambda 1 Hs.108896 H99932 51084
4397	G_1631253	0.53135	0.35	0.636265		307552 STMN3 stathmin-like 3 Hs.285753 AA994305 50861
568	G_785933	-0.60298	-0.2	0.635283		103446 SRPX sushi-repeat-containing protein, X chromosome Hs.15154 AA448569 8406
941	G_135118	-0.56853	-0.28333	0.635218		101778 GATA3 GATA binding protein 3 Hs.169946 R31441 GATA-3=T-cell specific transcription factor 2625
2590	G_1909457	-0.36923	-0.51667	0.635042		315250 SPUVE protease, serine, 23 Hs.25338 AI299995 11098
252	G_757248	0.39143	0.5	0.634994		115682 CAPN3 calpain 3, (p94) Hs.40300 AA426053 825
4373	G_745083	0.56808	0.28333	0.634816		222865 USP18 ubiquitin specific protease 18 Hs.38260 AA626356 11274
4785	G_796147	-0.46388	-0.43333	0.634791		109873 KIAA1200 KIAA1200 protein Hs.284157 AA460986 57475
4911	G_810571	-0.63394	-0.01667	0.634159		113304 ACACA acetyl-Coenzyme A carboxylase alpha Hs.7232 AA464580 31
887	G_2321104	-0.49166	-0.4	0.633821		311093 FLNC filamin C, gamma (actin binding protein 280) Hs.58414 AI675658 2318
4767	G_730483	-0.62822	0.08333	0.633723		106341 TAF4B **TAF4b RNA polymerase II, TATA box binding protein (TBP)-associated factor, 105kDa Hs.48820 AA412488 6875
484	G_75859	-0.56685	-0.28333	0.633715		317804 NDRG2 NDRG family member 2 Hs.243960 T59417 57447
1474	G_1492248	-0.5747	-0.26667	0.633556		314701 AA875950
3546	G_1556545	0.31396	0.55	0.633302		309768 FLJ30656 hypothetical protein FLJ30656 Hs.349887 AA935578 124801
1906	G_754625	-0.34141	-0.53333	0.633247		222889 ATP9A ATPase, Class II, type 9A Hs.70604 AA411394 10079
4277	G_813254	-0.59475	-0.21667	0.632988		108485 F2R coagulation factor II (thrombin) receptor Hs.128087 AA455910 2149
932	G_823688	-0.42745	-0.46667	0.632846		101342 MAN1A1 mannosidase, alpha, class 1A, member 1 Hs.25253 AA489636 4121
1755	G_884440	0.62486	-0.1	0.632811		223735 Homo sapiens cDNA FLJ30478 fis, clone BRAWH1000167 Hs.298258 AA629688
3358	G_416075	0.62456	0.1	0.632515		223931 TCF19 transcription factor 19 (SC1) Hs.249184 W85878 6941
1163	G_788285	-0.28038	-0.56667	0.63224		111691 EDNRA endothelin receptor type A Hs.76252 AA450009 1909
2617	G_108265	-0.46026	-0.43333	0.63215		105309 LOC147184 LOC147184 Hs.13740 T70541 147184
542	G_2493796	-0.42606	-0.46667	0.631908		330646 PLTP phospholipid transfer protein Hs.283007 AI985827 5360
2034	G_126829	-0.33881	-0.53333	0.631849		107112 Homo sapiens cDNA: FLJ21288 fis, clone COL01927 Hs.6019 R07184
2219	G_469969	-0.36323	-0.51667	0.631573		115787 ITGAV integrin, alpha V (vitronectin receptor, alpha polypeptide, antigen CD51) Hs.295726 AA029934 3685
1350	G_1933127	-0.50105	-0.38333	0.630867		309938 GJA12 gap junction protein, alpha 12, 47kDa Hs.100072 AI367323 57165
5101	G_970649	-0.45821	-0.43333	0.630659		224770 BM039 uncharacterized bone marrow protein BM039 Hs.283532 AA774724 55839
2730	G_785886	-0.36157	-0.51667	0.630619		109227 RNF13 ring finger protein 13 Hs.6900 AA449361 11342
2579	G_134719	-0.47302	-0.41667	0.630366		101526 RINZF zinc finger protein RINZF Hs.237146 R28071 65986
1451	G_768316	-0.23884	-0.58333	0.630332		116042 ABCC1 **ATP-binding cassette, sub-family C (CFTR/MRP), member 1 Hs.89433 AA424804 4363
2111	G_490753	-0.4727	-0.41667	0.630126		222500 FLJ20420 hypothetical protein FLJ20420 Hs.6693 AA133166 54927
2428	G_284306	-0.35985	-0.51667	0.629635		224597 FBXL3A F-box and leucine-rich repeat protein 3A Hs.7540 N52205 26224
1172	G_840984	-0.33466	-0.53333	0.629633		118913 CAV2 caveolin 2 Hs.139851 AA486567 858
5028	G_32381	0.58457	0.23333	0.629416		224261 GABRB3 gamma-aminobutyric acid (GABA) A receptor, beta 3 Hs.1440 R17962 2562
3916	G_838774	-0.52285	-0.35	0.629184		100198 MGC3165 similar to H2A histone family, member A (H. sapiens) Hs.348495 AA457566 92815
2744	G_503851	-0.44347	-0.44583	0.628832		106028 TBLR1 nuclear receptor co-repressor/HDAC3 complex subunit Hs.350547 AA130042 79718
1208	G_687625	0.4015	0.48333	0.628339		111513 nexilin likely ortholog of rat F-actin binding protein nexilin Hs.216381 AA235347 91624
2217	G_2446706	-0.45443	-0.43333	0.627918		330580 SUDD sudD suppressor of bimD6 homolog (A. nidulans) Hs.209061 AI925065 8780
3032	G_264162	-0.56813	-0.26667	0.627602		116760 HSPC157 HSPC157 protein Hs.279842 N20480 29092
3649	G_769933	-0.60004	-0.18333	0.627422		103155 NSAP1 NS1-associated protein 1 Hs.46801 AA430506 10492
4575	G_72426	0.37851	0.5	0.627112		103416 ESTs Hs.210589 T51592
219	G_45544	0.49589	0.38333	0.626777		109139 TAGLN2 transgelin 2 Hs.75725 H08563 8407
3389	G_1927758	0.61541	0.11667	0.626372		318564 EST Hs.145678 AI266125
934	G_469762	0.54033	0.31667	0.626288		114897 GJA7 gap junction protein, alpha 7, 45kDa (connexin 45) Hs.377116 AA027950 10052
771	G_358531	-0.32753	-0.53333	0.625873		111813 JUN v-jun sarcoma virus 17 oncogene homolog (avian) Hs.78465 W96134 3725
5096	G_827144	-0.50711	-0.36667	0.625785		101348 MRPL19 mitochondrial ribosomal protein L19 Hs.75574 AA521243 KIAA0104 9801
496	G_681992	-0.58031	-0.23333	0.625462		317858 AASS aminoadipate-semialdehyde synthase Hs.184168 AA256200 10157
863	G_823871	-0.26467	-0.56667	0.625432		100661 SPARCL1 SPARC-like 1 (mast9, hevin) Hs.75445 AA490471 8404
1659	G_787938	-0.43416	-0.45	0.625296		115520 SLC4A4 solute carrier family 4, sodium bicarbonate cotransporter, member 4 Hs.5462 AA452278 8671
732	G_143426	-0.50643	-0.36667	0.625235		313992 ARHB ras homolog gene family, member B Hs.204354 R74467 388
2233	G_118015	-0.49362	-0.38333	0.624982		105201 Homo sapiens cDNA FLJ40919 fis, clone UTERU2005601 Hs.16970 T92157
505	G_724888	0.51758	-0.35	0.624811		102015 CYP4B1 cytochrome P450, subfamily IVB, polypeptide 1 Hs.687 AA291484 Cytochrome P450 IVB1 1580
726	G_809707	-0.46529	-0.41667	0.624587		178262 JUNB jun B proto-oncogene Hs.198951 AA454711 jun-B 3726
2878	G_488645	-0.29584	-0.55	0.624517		108175 ARHGEF5 Rho guanine nucleotide exchange factor (GEF) 5 Hs.334 AA045822 7984
1476	G_815142	0.43287	0.45	0.624401		308982 SACS spastic ataxia of Charlevoix-Saguenay (sacsin) Hs.159492 AA481194 26278
4155	G_1908389	-0.43286	-0.45	0.624394		318832 ZNF42 zinc finger protein 42 (myeloid-specific retinoic acid- responsive) Hs.169832 AI300989 7593
1167	G_488479	-0.32464	-0.53333	0.624365		116451 TPM1 tropomyosin 1 (alpha) Hs.77899 AA047403 7168
705	G_268652	0.49281	0.38333	0.624343		105418 CDKN1A cyclin-dependent kinase inhibitor 1A (p21, Cip1) Hs.179665 N23941 p21=cyclin kinase inhibitor=WAF1=CIP1 1026
425	G_770672	0.39494	0.48333	0.624168		115214 KIAA0963 KIAA0963 protein Hs.7724 AA476273 22904
444	G_810515	-0.41424	-0.46667	0.624		109963 PTPRE protein tyrosine phosphatase, receptor type, E Hs.31137 AA464542 5791
1408	G_768417	-0.41419	-0.46667	0.623967		112111 EPB41L3 erythrocyte membrane protein band 4.1-like 3 Hs.103839 AA495835 23136
1160	G_193182	-0.32386	-0.53333	0.62396		110935 TACC1 transforming, acidic coiled-coil containing protein 1 Hs.173159 H47327 6867
3899	G_320495	0.44835	0.43333	0.623532		119040 QKI **homolog of mouse quaking QKI (KH domain RNA binding protein) Hs.15020 W16659 9444
3179	G_545138	-0.2197	-0.58333	0.623331		109759 AA075725
3656	G_1660570	-0.5259	-0.33333	0.622639		313463 AI082622
149	G_115223	0.62166	0.03333	0.622553		112504 T86602
4980	G_2062418	-0.61398	-0.1	0.62207		308059 AIM1 absent in melanoma 1 Hs.161002 AI337422 202
4479	G_324901	-0.29024	-0.55	0.621884		119812 WNT5A wingless-type MMTV integration site family, member 5A Hs.152213 W49672 7474
3393	G_264502	0.51403	0.35	0.621874		222303 Homo sapiens cDNA FLJ38275 fis, clone FCBBF3003902, moderately similar to GROWTH-ARREST-SPECIFIC PROTEIN 2 Hs.20575 N20305
2575	G_486340	-0.3913	-0.48333	0.621871		222378 E2F5 E2F transcription factor 5, p130-binding Hs.2331 AA044123 1875
2087	G_855395	-0.46053	-0.41667	0.621049		109454 SCP2 sterol carrier protein 2 Hs.75760 AA664009 6342
1510	G_796536	-0.28829	-0.55	0.620976		308306 Homo sapiens cDNA FLJ31372 fis, clone NB9N42000281 Hs.89388 AA460263
383	G_1689876	-0.56832	-0.25	0.620876		317120 SLC26A4 solute carrier family 26, member 4 Hs.159275 AI139968 5172
3115	G_22895	0.60975	-0.11667	0.620812		115211 INSM1 insulinoma-associated 1 Hs.89584 R38640 3642
4700	G_434778	-0.4599	-0.41667	0.620582		223066 LOC55971 insulin receptor tyrosine kinase substrate Hs.23449 AA701864 55971
1112	G_781472	-0.48789	-0.38333	0.620466		106363 DKFZp761K2222 hypothetical protein DKFZp761K2222 Hs.368944 AA431106 221895
2578	G_1855393	-0.38872	-0.48333	0.620251		313136 RINZF zinc finger protein RINZF Hs.237146 AI271348 65986
2036	G_340995	-0.36649	-0.5	0.619931		308588 ATP7A ATPase, Cu++ transporting, alpha polypeptide (Menkes syndrome) Hs.606 W57930 538
2746	G_2421421	-0.28531	-0.55	0.619598		331090 SNX4 sorting nexin 4 Hs.267812 AI818235 8723
3306	G_1580194	0.51094	0.35	0.619322		307663 LOC93109 hypothetical protein BC007772 Hs.105640 AA968462 93109
1398	G_1883559	0.55896	0.26667	0.619313		319580 FST follistatin Hs.9914 AI214697 10468
3998	G_1751408	0.53198	0.31667	0.619098		315135 GAGE8 G antigen 8 Hs.251406 AI187350 26749
1971	G_261219	-0.52162	-0.33333	0.619029		120328 FLJ22004 hypothetical protein FLJ22004 Hs.108812 H98233 80255
472	G_1581507	-0.20717	-0.58333	0.619026		224530 SEMA6C sema domain, transmembrane domain (TM), and cytoplasmic domain, (semaphorin) 6C Hs.54937 AA983888 10500
1462	G_823932	-0.24835	-0.56667	0.618702		120351 Homo sapiens cDNA FLJ30635 fis, clone CTONG2002520 Hs.351331 AA490210
2395	G_755765	-0.44152	-0.43333	0.618639		224382 AGM1 N-acetylglucosamine-phosphate mutase Hs.237323 AA496455 26089
221	G_322160	-0.60004	-0.15	0.618505		110889 PTEN phosphatase and tensin homolog (mutated in multiple advanced cancers 1) Hs.10712 W37855 MMAC1=PTEN=Tumor suppressor gene at 10q23.3 that is Mutated 5728
2193	G_897773	-0.38566	-0.48333	0.618338		119855 KIAA0697 KIAA0697 protein Hs.12329 AA598515 26057
4981	G_1840210	-0.59534	-0.16667	0.61823		315866 PIGN phosphatidylinositol glycan, class N Hs.108787 AI214706 23556
2514	G_159535	-0.45634	-0.41667	0.617948		220449 ESTs Hs.31383 H15812
470	G_2297394	-0.40481	-0.46667	0.61778		316789 FLJ13612 hypothetical protein FLJ13612 Hs.24391 AI635773 80303
480	G_502177	-0.47055	-0.4	0.61759		100359 MYH11 myosin, heavy polypeptide 11, smooth muscle Hs.78344 AA126989 4629
16	G_868838	-0.50821	-0.35	0.617072		105623 HPGD hydroxyprostaglandin dehydrogenase 15-(NAD) Hs.77348 AA775223 3248
2392	G_204790	-0.43925	-0.43333	0.617021		104082 FLJ20273 RNA-binding protein Hs.95549 H57105 54502
1067	G_23073	0.57097	0.23333	0.616806		117787 FGF2 fibroblast growth factor 2 (basic) Hs.284244 R38539 FGF-2=bFGF=Basic fibroblast growth factor 2247
4455	G_121804	-0.57063	-0.23333	0.616491		221847 Homo sapiens mRNA; cDNA DKFZp762N226 (from clone DKFZp762N226) Hs.268573 T97312
548	G_68605	-0.38252	-0.48333	0.616384		118242 IGFBP7 insulin-like growth factor binding protein 7 Hs.119206 T53297 3490
1829	G_27388	-0.45247	-0.41667	0.615096		223317 PEPP2 **phosphoinositol 3-phosphate-binding protein-2 Hs.86149 R13941 54477
3226	G_321658	-0.48084	-0.38333	0.614938		115343 Homo sapiens cDNA FLJ13603 fis, clone PLACE1010270 Hs.25252 W32933
3501	G_252185	0.33326	0.51667	0.614825		100989 TAF1C TATA box binding protein (TBP)-associated factor, RNA polymerase I, C, 110kDa Hs.153022 H87495 SL1 transcription factor 9013
1514	G_1588859	-0.51649	-0.33333	0.614712		307536 ESTs Hs.174402 AA987815
4571	G_130791	0.57518	0.21667	0.614636		118494 ESTs, Weakly similar to 2109260A B cell growth factor [Homo sapiens] [H.sapiens] Hs.268979 R22057
1806	G_868652	-0.39934	-0.46667	0.61421		119117 C4B complement component 4B Hs.278625 AA664406 721
1645	G_141763	-0.37899	-0.48333	0.6142		98783 KIAA0295 KIAA0295 protein Hs.155979 R69795 23060
173	G_1589754	-0.23683	-0.56667	0.614169		313962 ESTs, Highly similar to FRGL_HUMAN Hypothetical FRG1-like protein c20orf80 [H.sapiens] Hs.356382 AA946743
3189	G_155806	-0.13104	-0.6	0.614143		112895 OAS2 2'-5'-oligoadenylate synthetase 2, 69/71kDa Hs.264981 R72243 4939
3661	G_884692	-0.43501	-0.43333	0.61401		109327 TCEB2 transcription elongation factor B (SIII), polypeptide 2 (18kDa, elongin B) Hs.172772 AA630017 6923
1484	G_45376	0.43459	0.43333	0.613713		113529 ACAA2 acetyl-Coenzyme A acyltransferase 2 (mitochondrial 3-oxoacyl-Coenzyme A thiolase) Hs.356176 H07926 10449
3785	G_740826	0.30358	0.53333	0.613679		105992 ESTs Hs.36683 AA477687
728	G_825461	-0.57411	-0.21667	0.613635		224707 GADD45B growth arrest and DNA-damage-inducible, beta Hs.110571 AA504354 4616
4281	G_1554564	0.47892	0.38333	0.613438		98468 EST Hs.126804 AA931050
530	G_285344	0.46497	0.4	0.613349		120720 ESTs Hs.7360 N66336
4999	G_292399	-0.35519	-0.5	0.613319		99715 CPS1 **carbamoyl-phosphate synthetase 1, mitochondrial Hs.50966 N68399 1373
966	G_204545	-0.32976	-0.51667	0.612935		103839 TEM8 tumor endothelial marker 8 Hs.8966 H58644 84168
4524	G_773138	-0.46412	-0.4	0.612705		105918 PRO1489 hypothetical protein PRO1489 Hs.197922 AA425373 55450
2777	G_150262	-0.44893	-0.41667	0.612497		119132 FLJ13263 hypothetical protein FLJ13263 Hs.288768 H01128 80195
1886	G_258688	-0.23245	-0.56667	0.612493		111950 KIAA1255 KIAA1255 protein Hs.351633 N30075 57500
4518	G_279197	-0.44883	-0.41667	0.612423		114037 ESTs, Weakly similar to zinc finger protein 331; zinc finger protein 463; C2H2-like zinc finger protein [Homo sapiens] [H.sapiens] Hs.76561 N46863
3543	G_2313669	-0.4323	-0.43333	0.612093		317208 TBL2 transducin (beta)-like 2 Hs.52515 AI675874 26608
1751	G_129883	0.35247	0.5	0.611748		227113 NOTCH2 **Notch homolog 2 (Drosophila) Hs.8121 R11461 4853
1063	G_704277	-0.41438	-0.45	0.611728		225962 Homo sapiens cDNA FLJ30652 fis, clone DFNES2000011 Hs.5724 AA279422
298	G_769975	0.59258	0.15	0.61127		309018 ARHGEF2 rho/rac guanine nucleotide exchange factor (GEF) 2 Hs.337774 AA427441 9181
2457	G_767113	-0.35099	-0.5	0.610896		99944 FLJ20360 hypothetical protein FLJ20360 Hs.26434 AA424537 54906
3970	G_566434	-0.54116	-0.28333	0.610844		117240 SLC38A5 solute carrier family 38, member 5 Hs.195155 AA149673 92745
4564	G_795757	-0.2653	-0.55	0.610642		102898 ESTs Hs.374319 AA460314
1170	G_589362	-0.35038	-0.5	0.610546		115765 CLU **clusterin (complement lysis inhibitor, SP-40,40, sulfated glycoprotein 2, testosterone-repressed prostate message 2, apolipoprotein J) Hs.75106 AA130016 1191
3413	G_810600	0.46089	0.4	0.610262		116125 E2-EPF ubiquitin carrier protein Hs.174070 AA464019 27338
4453	G_610883	0.54889	0.26667	0.61024		113895 PCDHA10 protocadherin alpha 10 Hs.247735 AA172188 56139
5131	G_898286	0.50267	0.34583	0.610144		107303 CDC2 cell division cycle 2, G1 to S and G2 to M Hs.334562 AA598974 983
1959	G_773278	-0.3245	-0.51667	0.610121		120729 DNAJB9 DnaJ (Hsp40) homolog, subfamily B, member 9 Hs.6790 AA425320 4189
3544	G_784126	0.17873	0.58333	0.610097		101392 TST thiosulfate sulfurtransferase (rhodanese) Hs.351863 AA432063 7263
3288	G_743113	0.60631	0.06667	0.609965		116603 KLK13 kallikrein 13 Hs.165296 AA399955 26085
243	G_1686177	0.60424	-0.08333	0.609959		317891 EST Hs.228795 AI094726
4525	G_884514	-0.52095	-0.31667	0.609646		220266 KIAA1946 KIAA1946 protein Hs.172792 AA629991 165215
460	G_840333	-0.44475	-0.41667	0.609439		118309 KIAA0089 KIAA0089 protein Hs.82432 AA485401 23171
284	G_77911	-0.29479	-0.53333	0.609378		118700 FLJ20366 hypothetical protein FLJ20366 Hs.8358 T61269 55638
452	G_452417	-0.4987	-0.35	0.609263		224215 KIAA0680 KIAA0680 gene product Hs.102471 AA700164 9749
1363	G_744395	-0.53931	-0.28333	0.609205		114732 ATIP1 AT2 receptor-interacting protein 1 Hs.7946 AA621202 57509
3294	G_789253	-0.59441	-0.13333	0.60918		118029 PSEN2 presenilin 2 (Alzheimer disease 4) Hs.25363 AA450249 PS-2=PRESENILIN 2=STM2=ALG-3=seven trans-membrane domain pro 5664
1789	G_25763	-0.32222	-0.51667	0.608912		307359 ANKH ankylosis, progressive homolog (mouse) Hs.168640 R12303 56172
3596	G_809682	0.40943	0.45	0.608386		98951 TNRC5 trinucleotide repeat containing 5 Hs.56828 AA454691 10695
107	G_587388	0.17274	0.58333	0.608369		115883 LIPH lipase, member H Hs.68864 AA132858 200879
643	G_127032	-0.25998	-0.55	0.60835		315623 BIRC3 baculoviral IAP repeat-containing 3 Hs.127799 R07870 330
1615	G_855624	-0.32028	-0.51667	0.607887		118798 ALDH1A1 aldehyde dehydrogenase 1 family, member A1 Hs.76392 AA664101 216
3884	G_756687	-0.54615	-0.26667	0.607777		117855 SCARB1 scavenger receptor class B, member 1 Hs.180616 AA443899 949
3539	G_841645	-0.40836	-0.45	0.607666		119905 CLDN7 claudin 7 Hs.278562 AA487488 1366
2520	G_277187	-0.53755	-0.28333	0.607648		115398 DUSP16 dual specificity phosphatase 16 Hs.20281 N40952 80824
4631	G_786525	-0.49644	-0.35	0.607415		105851 KIAA1917 KIAA1917 protein Hs.294151 AA452113 114804
2093	G_825822	-0.38841	-0.46667	0.60716		224034 DJ167A19.1 hypothetical protein DJ167A19.1 Hs.11923 AA491370 54432
3530	G_1636206	0.31845	0.51667	0.606925		311304 FLJ22357 hypothetical protein FLJ22357 similar to epidermal growth factor receptor-related protein Hs.57988 AI016695 64285
4201	G_49509	0.58791	0.15	0.606744		118416 EPOR erythropoietin receptor Hs.127826 H15574 2057
3761	G_2577245	-0.60079	0.08333	0.606541		331162 RPL18A ribosomal protein L18a Hs.163593 AW075603 6142
1870	G_201687	-0.38678	-0.46667	0.606119		111143 Homo sapiens mRNA; cDNA DKFZp586F1822 (from clone DKFZp586F1822) Hs.82719 R99733
915	G_810504	0.60036	-0.08333	0.606116		120183 PLP2 proteolipid protein 2 (colonic epithelium-enriched) Hs.77422 AA464528 5355
902	G_298104	-0.5438	-0.26667	0.605666		104492 DZIP1 zinc-finger protein DZIP1 Hs.60177 N70759 22873
405	G_280782	-0.42228	-0.43333	0.605058		222568 HPS3 Hermansky-Pudlak syndrome 3 Hs.282804 N50654 84343
23	G_121637	-0.53462	-0.28333	0.605057		222141 FLJ23231 hypothetical protein FLJ23231 Hs.288300 T97554 80149
4892	G_49630	-0.45384	-0.4	0.604955		112948 CACNA1D calcium channel, voltage-dependent, L type, alpha 1D subunit Hs.23838 H29256 776
3729	G_1947890	0.25107	0.55	0.604596		311725 EST Hs.228315 AI350489
3071	G_815263	0.49292	0.35	0.604541		185923 Homo sapiens cDNA FLJ13858 fis, clone THYRO1001031 Hs.332754 AA481536 Unknown UG Hs.105180 EST, Weakly similar to putative p150
2354	G_809541	-0.31367	-0.51667	0.604431		103450 BCL2L2 BCL2-like 2 Hs.75244 AA454588 599
3464	G_1618978	0.45308	0.4	0.604385		308722 FLJ13936 hypothetical protein FLJ13936 Hs.165607 AA992090 84145
2092	G_753917	-0.36253	-0.48333	0.604182		101726 TM9SF2 transmembrane 9 superfamily member 2 Hs.28757 AA479100 9375
1955	G_328889	-0.33761	-0.5	0.603308		110477 MBP myelin basic protein Hs.69547 W40480 4155
1559	G_280592	0.45154	0.4	0.603232		220296 ESTs Hs.191349 N50406
4302	G_362588	0.15286	0.58333	0.603026		225634 Homo sapiens clone 24649 mRNA sequence Hs.322473 AA018113
337	G_1932984	0.28139	0.53333	0.60301		308639 FLRT2 fibronectin leucine rich transmembrane protein 2 Hs.48998 AI338894 23768
2885	G_897906	-0.20591	-0.56667	0.602921		118738 SIAT1 sialyltransferase 1 (beta-galactoside alpha-2,6-sialytransferase) Hs.2554 AA598652 6480
714	G_593223	-0.43565	-0.41667	0.602831		101931 VMP1 likely ortholog of rat vacuole membrane protein 1 Hs.166254 AA159669 81671
1337	G_366966	-0.49072	-0.35	0.602749		107928 Homo sapiens cDNA: FLJ21333 fis, clone COL02535 Hs.27865 AA026470
1579	G_726596	0.51208	0.31667	0.602085		116076 KIAA1805 KIAA1805 protein Hs.294122 AA394299 84450
4840	G_139113	-0.38032	-0.46667	0.602017		114121 GOLPH3 golgi phosphoprotein 3 (coat-protein) Hs.18271 R62968 64083
795	G_1536215	-0.54678	-0.25	0.601222		220290 GALNAC4S-6ST B cell RAG associated protein Hs.6079 AA923552 51363
1161	G_855389	-0.30687	-0.51667	0.60093		311021 TACC1 transforming, acidic coiled-coil containing protein 1 Hs.173159 AA664006 6867
2745	G_589479	-0.33246	-0.5	0.600441		114963 HPCL2 2-hydroxyphytanoyl-CoA lyase Hs.63290 AA157129 26061
3000	G_845380	0.57164	0.18333	0.600318		224845 FLJ31340 hypothetical protein FLJ31340 Hs.31570 AA644099 222223
2524	G_1622783	-0.51984	-0.3	0.600195		309339 MGC26963 hypothetical protein MGC26963 Hs.353519 AA993156 166929
61	G_124922	-0.50904	-0.31667	0.599501		99391 SZF1 KRAB-zinc finger protein SZF1-1 Hs.19585 R05934 51385
1373	G_453195	0.58444	0.13333	0.599456		224656 ANGPTL2 angiopoietin-like 2 Hs.8025 AA704833 23452
2775	G_823588	-0.39597	-0.45	0.59941		105451 FLJ13263 hypothetical protein FLJ13263 Hs.288768 AA497050 80195
3671	G_2557762	-0.59567	-0.06667	0.599389		330898 PYCR1 pyrroline-5-carboxylate reductase 1 Hs.79217 AW050510 5831
2633	G_1555233	-0.49805	-0.33333	0.599302		315763 Homo sapiens, clone MGC:10240 IMAGE:3913592, mRNA, complete cds Hs.126825 AA931428
3878	G_756163	0.37583	0.46667	0.59919		111744 BCR breakpoint cluster region Hs.234799 AA419342 bcr=break point cluster gene 613
4032	G_1473071	0.44603	0.4	0.599118		99463 EST Hs.126244 AA873479
3648	G_1055577	0.3032	0.51667	0.599064		223944 CBX3 chromobox homolog 3 (HP1 gamma homolog, Drosophila) Hs.278554 AA620894 11335
3133	G_773142	0.57945	0.15	0.59855		120669 MGC2827 hypothetical protein MGC2827 Hs.8035 AA425375 65997
1271	G_1948644	-0.48551	-0.35	0.598515		318965 AI335854
5059	G_244391	-0.45963	-0.38333	0.598499		112613 Homo sapiens DNA binding peptide mRNA, partial cds Hs.37372 N52837
3490	G_1394099	0.32882	0.5	0.598433		310078 MGC5528 hypothetical protein MGC5528 Hs.315167 AA843451 79075
2627	G_384088	-0.59445	-0.06667	0.598177		119999 KIAA0711 KIAA0711 gene product Hs.5333 AA702544 9920
1481	G_285155	-0.57885	0.15	0.597969		101494 ODZ2 odd Oz/ten-m homolog 2 (Drosophila, mouse) Hs.173560 N71920 57451
2974	G_511590	0.27008	0.53333	0.597816		103771 ESTs, Weakly similar to hypothetical protein FLJ20378 [Homo sapiens] [H.sapiens] Hs.335198 AA126913
4780	G_1679125	-0.30025	-0.51667	0.597577		317637 TRNT1 tRNA nucleotidyl transferase, CCA-adding, 1 Hs.102897 AI074113 51095
192	G_130826	0.35125	0.48333	0.597482		117924 ESTs Hs.23349 R22189
4913	G_448117	-0.39302	-0.45	0.597465		221102 AA702480
4636	G_43229	0.47107	0.36667	0.596954		112253 PCNA proliferating cell nuclear antigen Hs.78996 H05891 5111
1225	G_278523	-0.48341	-0.35	0.596813		220243 SLMAP sarcolemma associated protein Hs.4007 N66156 7871
5071	G_1468074	0.49486	0.33333	0.596653		222083 AA889397
665	G_713696	-0.26721	-0.53333	0.596525		118928 TIMP1 tissue inhibitor of metalloproteinase 1 (erythroid potentiating activity, collagenase inhibitor) Hs.5831 AA284534 7076
2090	G_884766	-0.39154	-0.45	0.596493		110558 TEGT testis enhanced gene transcript (BAX inhibitor 1) Hs.74637 AA629591 7009
3846	G_795263	0.32519	0.5	0.596447		107118 FLJ22638 hypothetical protein FLJ22638 Hs.183232 AA453186 79897
95	G_131887	-0.5812	-0.13333	0.596297		104314 FLJ14146 hypothetical protein FLJ14146 Hs.103395 R24664 79762
2700	G_451532	-0.39114	-0.45	0.59623		319062 INPP4B inositol polyphosphate-4-phosphatase, type II, 105kDa Hs.153687 AA707388 8821
3770	G_154442	-0.50489	-0.31667	0.595981		112468 STUB1 STIP1 homology and U-Box containing protein 1 Hs.25197 AI732281 10273
4321	G_503338	0.42563	0.41667	0.59563		108224 WT1 Wilms tumor 1 Hs.1145 AA130187 7490
5034	G_416390	-0.34766	-0.48333	0.595378		113284 NVL nuclear VCP-like Hs.58927 W86666 4931
3339	G_814084	-0.58016	-0.13333	0.595284		222068 ESTs Hs.58714 AA465354
2190	G_320763	-0.2955	-0.51667	0.595204		100147 SP3 Sp3 transcription factor Hs.154295 W31688 6670
4172	G_757489	-0.56594	-0.18333	0.594893		117585 **ESTs, Weakly similar to S31216 collagen alpha 1(X) chain precursor - mouse [M.musculus] Hs.19193 AA426374
4859	G_1554928	-0.49261	-0.33333	0.594789		319347 EST, Moderately similar to zinc-finger protein ZBRK1 [Homo sapiens] [H.sapiens] Hs.166211 AA954663
4842	G_950688	-0.44007	-0.4	0.594695		107898 ATP6V1G1 ATPase, H+ transporting, lysosomal 13kDa, V1 subunit G isoform 1 Hs.90336 AA608567 9550
4360	G_1679531	-0.53938	-0.25	0.5945		311130 HAS2 hyaluronan synthase 2 Hs.159226 AI142961 3037
1796	G_712604	-0.34594	-0.48333	0.594376		114949 AA281932
2752	G_281442	-0.22534	-0.55	0.594372		220250 HAKAI E-cadherin binding protein E7 Hs.292767 N47902 79872
856	G_245330	0.42369	0.41667	0.594245		116829 IGF2 insulin-like growth factor 2 (somatomedin A) Hs.349109 N54596 3481
604	G_840691	-0.2243	-0.55	0.593979		108390 STAT1 signal transducer and activator of transcription 1, 91kDa Hs.21486 AA486367 STAT1=IFN alpha/beta-responsive transcription factor ISGF3 b 6772
4968	G_810446	-0.56493	-0.18333	0.593932		109854 KIAA1522 KIAA1522 protein Hs.322735 AA457115 57648
4554	G_780958	-0.22377	-0.55	0.593779		104102 Homo sapiens mRNA full length insert cDNA clone EUROIMAGE 1674211 Hs.21734 AA429809
382	G_1323233	0.49114	0.33333	0.593572		308164 CYP24 cytochrome P450, subfamily XXIV (vitamin D 24-hydroxylase) Hs.89663 AA877213 1591
1297	G_795758	-0.22265	-0.55	0.593357		113575 DKFZP434B044 hypothetical protein DKFZp434B044 Hs.262958 AA460304 83716
3157	G_486984	0.58487	0.1	0.593357		117971 NAV1 neuron navigator 1 Hs.6298 AA043878 89796
3567	G_1602493	0.25907	0.53333	0.592923		317137 PSMC3 proteasome (prosome, macropain) 26S subunit, ATPase, 3 Hs.250758 AA987573 5702
682	G_854789	-0.47856	-0.35	0.592891		223655 TIEG2 TGFB inducible early growth response 2 Hs.12229 AA630534 8462
163	G_1474402	0.40454	0.43333	0.592813		115498 ARHGEF5 Rho guanine nucleotide exchange factor (GEF) 5 Hs.334 AA922384 7984
1393	G_789369	0.5579	0.2	0.592666		118167 ID4 inhibitor of DNA binding 4, dominant negative helix-loop-helix protein Hs.34853 AA453341 3400
3931	G_984044	-0.59037	0.05	0.592484		103817 ESTs, Weakly similar to I38022 hypothetical protein - human [H.sapiens] Hs.380129 AA541579
1589	G_1635099	-0.28838	-0.51667	0.591702		108493 ESTs Hs.129530 AA994816
2609	G_204148	0.53614	0.25	0.591562		116306 RPS6KA3 ribosomal protein S6 kinase, 90kDa, polypeptide 3 Hs.173965 H55921 6197
2091	G_68087	-0.34003	-0.48333	0.590955		106018 FLJ34299 hypothetical protein FLJ34299 Hs.9521 T52872 168374
414	G_951108	0.55581	0.2	0.590699		113190 ESTs Hs.67928 AA620466
891	G_1586172	-0.44838	-0.38333	0.589904		310184 MRE11A MRE11 meiotic recombination 11 homolog A (S. cerevisiae) Hs.20555 AA974008 4361
394	G_78148	-0.43343	-0.4	0.589798		98697 Homo sapiens, clone IMAGE:4711494, mRNA Hs.177781 T60269
3201	G_245774	-0.28439	-0.51667	0.589767		105665 DEPP decidual protein induced by progesterone Hs.93675 N55269 11067
91	G_755165	0.16198	0.56667	0.589366		113862 RPS8 ribosomal protein S8 Hs.151604 AA411454 6202
2792	G_236338	-0.44714	-0.38333	0.588962		121008 TP53 tumor protein p53 (Li-Fraumeni syndrome) Hs.1846 H61357 p53 7157
2136	G_149355	-0.39881	-0.43333	0.588918		163267 TRAM translocating chain-associating membrane protein Hs.4147 H01495 TRAMP protein=endoplasmic reticulum protein involved early i 23471
364	G_681917	-0.46079	-0.36667	0.588875		117617 IL1RAP interleukin 1 receptor accessory protein Hs.173880 AA256132 3556
2267	G_782812	-0.28148	-0.51667	0.58837		119267 Homo sapiens, clone IMAGE:4052451, mRNA Hs.181315 AA448251
3677	G_345833	0.31006	0.5	0.588334		112276 HNRPAB heterogeneous nuclear ribonucleoprotein A/B Hs.81361 W72693 3182
406	G_810444	0.58216	0.08333	0.588094		107881 TNFAIP2 tumor necrosis factor, alpha-induced protein 2 Hs.101382 AA457114 7127
1173	G_588829	-0.30932	-0.5	0.587945		101653 AARS alanyl-tRNA synthetase Hs.75102 AA156571 16
1871	G_470187	-0.53962	-0.23333	0.587905		225939 GALNT1 UDP-N-acetyl-alpha-D-galactosamine:polypeptide N-acetylgalactosaminyltransferase 1 (GalNAc-T1) Hs.80120 AA029851 2589
4062	G_415086	0.2801	0.51667	0.587711		119536 KLRC3 killer cell lectin-like receptor subfamily C, member 3 Hs.258850 W93370 3823
1840	G_243100	-0.576	-0.11667	0.587697		112348 ACADSB acyl-Coenzyme A dehydrogenase, short/branched chain Hs.81934 H95792 36
4480	G_357278	-0.24683	-0.53333	0.587678		115793 WNT5A wingless-type MMTV integration site family, member 5A Hs.152213 W93592 7474
893	G_2110301	-0.41413	-0.41667	0.587467		316117 GFPT2 glutamine-fructose-6-phosphate transaminase 2 Hs.30332 AI417407 9945
2195	G_1895477	-0.3084	-0.5	0.587461		314016 Homo sapiens cDNA FLJ33669 fis, clone BRAMY2028740 Hs.13328 AI291541
4962	G_795543	-0.44514	-0.38333	0.587445		114266 PRDX4 peroxiredoxin 4 Hs.83383 AA459663 10549
3642	G_505289	-0.58357	0.06667	0.587366		115033 AGTRAP angiotensin II receptor-associated protein Hs.12854 AA152027 57085
335	G_345680	-0.57165	-0.13333	0.586993		101148 ARHI ras homolog gene family, member I Hs.194695 W72033 9077
2261	G_767983	-0.30727	-0.5	0.586869		107536 LOC113201 hypothetical protein BC012124 Hs.323966 AA418825 113201
4457	G_453205	-0.52259	-0.26667	0.586697		221373 ESTs Hs.117084 AA704838
4900	G_133130	-0.44393	-0.38333	0.586529		103681 AMACR alpha-methylacyl-CoA racemase Hs.128749 R25375 23600
784	G_731292	-0.27753	-0.51667	0.58649		110541 Homo sapiens mRNA; cDNA DKFZp564C2063 (from clone DKFZp564C2063) Hs.4055 AA416628
3004	G_283089	0.55074	0.2	0.58593		98809 ESTs, Weakly similar to C35826 hypothetical 13K protein A - human [H.sapiens] Hs.47209 N51315
3025	G_1656817	-0.57728	-0.1	0.585877		318257 ESTs Hs.269849 AI040624
314	G_251461	0.5443	0.21667	0.58584		98403 H98001
2586	G_44814	-0.4568	-0.36667	0.585759		101822 ITGA6 integrin, alpha 6 Hs.227730 H06635 3655
692	G_462953	-0.35393	-0.46667	0.585702		100244 MAOB monoamine oxidase B Hs.82163 AA682423 4129
713	G_824908	-0.4116	-0.41667	0.585686		310397 VMP1 likely ortholog of rat vacuole membrane protein 1 Hs.166254 AA489012 81671
1957	G_837904	-0.30459	-0.5	0.58547		113378 RPL15 ribosomal protein L15 Hs.74267 AA434088 6138
4295	G_454564	0.51196	0.28333	0.585132		223622 Homo sapiens annexin II receptor mRNA, complete cds Hs.119768 AA677025
2866	G_308238	-0.32968	-0.48333	0.585061		114013 COL1A1 **collagen, type I, alpha 1 Hs.172928 N92415 1277
3850	G_1323146	0.14422	0.56667	0.584734		109806 Homo sapiens cDNA: FLJ23065 fis, clone LNG04894 Hs.125352 AA877071
4723	G_2161750	-0.44127	-0.38333	0.584518		313163 CYorf15B chromosome Y open reading frame 15B Hs.145010 AI478789 84663
3322	G_1931377	0.40991	0.41667	0.5845		312780 C20orf119 chromosome 20 open reading frame 119 Hs.372714 AI351311 80336
2918	G_293990	0.53574	0.23333	0.584346		101622 ESTs, Moderately similar to plakophilin 2 [Homo sapiens] [H.sapiens] Hs.269106 N66063
427	G_595148	0.54256	0.21667	0.584224		119539 Homo sapiens BM32A mRNA for PMMLP, complete cds Hs.26612 AA164835
3365	G_461690	0.37218	0.45	0.583967		225209 ESTs Hs.98791 AA682260
4805	G_814306	-0.42526	-0.4	0.58382		99488 TPD52 tumor protein D52 Hs.2384 AA459100 7163
119	G_120162	-0.23722	-0.53333	0.583707		101527 T95273
2786	G_759159	-0.39078	-0.43333	0.58351		223882 MSTP032 MSTP032 protein Hs.274368 AA436935 80340
2583	G_416386	-0.45363	-0.36667	0.58329		105778 W86859
2227	G_825041	-0.39027	-0.43333	0.583169		226896 STAM2 signal transducing adaptor molecule (SH3 domain and ITAM motif) 2 Hs.17200 AA489211 10254
2274	G_272750	-0.37066	-0.45	0.583		223378 Homo sapiens cDNA FLJ10627 fis, clone NT2RP2005555 Hs.372616 N36233
3244	G_72498	-0.4661	-0.35	0.58288		110679 ESTs Hs.9344 T51726
1752	G_207288	0.34883	0.46667	0.582635		100137 INSIG1 insulin induced gene 1 Hs.56205 H59620 3638
2042	G_33715	-0.36995	-0.45	0.582549		107848 MKLN1 muskelin 1, intracellular mediator containing kelch motifs Hs.288791 R19008 4289
2560	G_24958	-0.29764	-0.5	0.581884		226810 AMOTL1 angiomotin like 1 Hs.17110 R38943 154810
1107	G_139689	0.34725	0.46667	0.58169		116073 FLJ22415 hypothetical protein FLJ22415 Hs.135121 R63922 79827
691	G_415804	-0.47641	-0.33333	0.581442		220202 ABCG2 ATP-binding cassette, sub-family G (WHITE), member 2 Hs.194720 W84773 9429
2344	G_292082	-0.40519	-0.41667	0.581199		108459 SSR3 signal sequence receptor, gamma (translocon-associated protein gamma) Hs.28707 N73309 6747
1879	G_506002	-0.32272	-0.48333	0.581168		309725 SIMP source of immunodominant MHC-associated peptides Hs.183454 AA708422 201595
4401	G_1584641	0.56527	-0.13333	0.580781		309492 TOX thymus high mobility group box protein TOX Hs.184297 AA972366 9760
997	G_361828	-0.26396	-0.51667	0.580192		220478 Homo sapiens cDNA FLJ38472 fis, clone FEBRA2022148 Hs.50150 W92438
2946	G_756509	0.12433	0.56667	0.580149		101503 H105E3 NAD(P) dependent steroid dehydrogenase-like; H105e3 Hs.57698 AA436425 50814
721	G_1759582	0.34439	0.46667	0.579987		317991 FN14 type I transmembrane protein Fn14 Hs.10086 AI221536 51330
677	G_773375	-0.29294	-0.5	0.579494		119862 Homo sapiens cDNA FLJ36908 fis, clone BRACE2003825 Hs.356719 AA425723
93	G_289818	-0.57058	-0.1	0.579277		101576 ALDH6A1 aldehyde dehydrogenase 6 family, member A1 Hs.293970 N62179 4329
3293	G_276091	-0.57299	-0.08333	0.579018		98451 ITPKB inositol 1,4,5-trisphosphate 3-kinase B Hs.78877 R94152 3707
884	G_812283	0.36419	0.45	0.578908		105769 KIAA1735 KIAA1735 protein Hs.61408 AA455092 85458
4878	G_206907	-0.57637	-0.05	0.578535		115276 MEG3 maternally expressed 3 Hs.112844 R98695 55384
1716	G_343403	-0.26004	-0.51667	0.578419		113664 KIAA0853 KIAA0853 protein Hs.136102 W67229 23091
4646	G_1947425	-0.46043	-0.35	0.578356		315773 LOC51110 CGI-83 protein Hs.118554 AI351180 51110
4392	G_503064	0.56639	-0.11667	0.578282		103428 RPS8 ribosomal protein S8 Hs.151604 AA149253 6202
297	G_754111	0.56936	-0.1	0.578075		104472 KIAA0877 KIAA0877 protein Hs.11217 AA478670 23333
3438	G_146882	0.34085	0.46667	0.577892		223871 UBE2C ubiquitin-conjugating enzyme E2C Hs.93002 R80790 11065
4739	G_1750512	-0.31593	-0.48333	0.577425		313537 JIK STE20-like kinase Hs.12040 AI084100 51347
1358	G_234425	-0.31583	-0.48333	0.57737		98777 Homo sapiens cDNA: FLJ21778 fis, clone HEP00201 Hs.283378 H93264
1218	G_796406	-0.33993	-0.46667	0.57735		116929 SORBS1 sorbin and SH3 domain containing 1 Hs.108924 AA459944 10580
2275	G_283034	-0.39963	-0.41667	0.577337		108421 ARL1 ADP-ribosylation factor-like 1 Hs.242894 N51280 400
1605	G_595001	-0.36137	-0.45	0.577138		103973 LOC83690 CocoaCrisp Hs.182364 AA164781 83690
1551	G_47476	0.43137	0.38333	0.577081		120982 FLJ31810 hypothetical protein FLJ31810 Hs.26239 H12045 158038
961	G_222343	-0.44555	-0.36667	0.577028		224253 DKFZp434D0215 hypothetical protein DKFZp434D0215 Hs.24715 H86071 152503
2755	G_1456160	-0.36118	-0.45	0.577019		118948 AZGP1 alpha-2-glycoprotein 1, zinc Hs.71 AA862465 563
4434	G_67769	0.54122	0.2	0.576991		120986 KCNK3 potassium channel, subfamily K, member 3 Hs.24040 T49657 3777
160	G_431316	-0.47042	-0.33333	0.576545		307585 TSPYL TSPY-like Hs.278479 AA706747 7259
4326	G_754378	-0.48139	-0.31667	0.576208		116493 PTGES prostaglandin E synthase Hs.146688 AA436163 9536
2002	G_814041	-0.35954	-0.45	0.575994		185790 Homo sapiens cDNA FLJ13207 fis, clone NT2RP4000023 Hs.14355 AA465485 Unknown sc_id2276
1015	G_45852	0.39762	0.41667	0.575948		120717 C1orf17 chromosome 1 open reading frame 17 Hs.106794 H08862 23127
2337	G_196781	-0.33731	-0.46667	0.575812		117970 FLJ12716 hypothetical protein FLJ12716 Hs.5354 R92835 60684
2567	G_1521689	-0.39731	-0.41667	0.575734		107657 ESTs Hs.130165 AA906945
26	G_752560	-0.5333	0.21667	0.575634		105277 FLJ12287 **hypothetical protein FLJ12287 similar to semaphorins Hs.7634 AA411009 64218
2243	G_291374	-0.33645	-0.46667	0.575308		224952 ARFGEF2 ADP-ribosylation factor guanine nucleotide-exchange factor 2 (brefeldin A-inhibited) Hs.118249 N72274 10564
2671	G_1604735	-0.54524	-0.18333	0.575236		105650 ESTs Hs.281314 AA988637
2835	G_149013	-0.50909	-0.26667	0.574705		98784 AMD1 S-adenosylmethionine decarboxylase 1 Hs.262476 R82299 262
1951	G_1912788	-0.49991	-0.28333	0.574618		318509 EST Hs.308812 AI304357
1770	G_50383	0.51733	0.25	0.57457		120769 KIAA1598 KIAA1598 protein Hs.23740 H17868 57698
1309	G_1592837	-0.25098	-0.51667	0.574403		311055 IFITM2 interferon induced transmembrane protein 2 (1-8D) Hs.174195 AA985421 10581
799	G_843321	0.50861	0.26667	0.57428		99448 KRT7 keratin 7 Hs.23881 AA485959 3855
1094	G_324205	-0.3565	-0.45	0.574101		108860 CTSB cathepsin B Hs.297939 W47179 1508
115	G_610006	-0.28204	-0.5	0.574061		109612 ESTs Hs.188687 AA169173
44	G_490779	0.51671	0.25	0.574012		116085 KIAA1634 KIAA1634 protein Hs.49169 AA133199 57725
2386	G_428486	-0.30958	-0.48333	0.573975		118524 DNAJC3 DnaJ (Hsp40) homolog, subfamily C, member 3 Hs.9683 AA004489 5611
2321	G_772447	-0.35619	-0.45	0.573909		118316 ESTs Hs.94881 AA405550
2124	G_2551144	-0.35593	-0.45	0.573747		330626 MLC-B myosin regulatory light chain Hs.180224 AI954996 103910
4168	G_1492510	0.30835	0.48333	0.573313		221001 Homo sapiens cDNA FLJ10776 fis, clone NT2RP4000323 Hs.34790 AA879064
1525	G_51599	-0.41067	-0.4	0.57328		120746 XK Kell blood group precursor (McLeod phenotype) Hs.78919 H18932 7504
2558	G_289794	-0.33265	-0.46667	0.573094		224106 Homo sapiens mRNA; cDNA DKFZp434O0227 (from clone DKFZp434O0227) Hs.44787 N59295
3927	G_1009824	-0.56908	0.06667	0.572972		109536 DDT D-dopachrome tautomerase Hs.180015 AA228813 1652
5023	G_290030	-0.57281	0	0.57281		220692 B3GAT1 beta-1,3-glucuronyltransferase 1 (glucuronosyltransferase P) Hs.381050 N64656 27087
4132	G_841103	0.07388	0.56667	0.571466		316754 AA486794
4919	G_1010955	-0.56751	-0.06667	0.571413		109247 TRG@ T cell receptor gamma locus Hs.112259 AA228477 6965
3191	G_236034	0.57129	0	0.57129		117964 UCP2 uncoupling protein 2 (mitochondrial, proton carrier) Hs.80658 H61242 UCP2=UCPH=Mitochondrial uncoupling protein 2 7351
2543	G_134829	-0.24285	-0.51667	0.570898		114852 Homo sapiens mRNA; cDNA DKFZp434E033 (from clone DKFZp434E033) Hs.15740 R31708
3156	G_451087	0.55882	0.11667	0.570869		316248 C6orf37 chromosome 6 open reading frame 37 Hs.10784 AA704517 55603
3268	G_1700966	-0.5546	-0.13333	0.570402		315426 TGIF2 TGFB-induced factor 2 (TALE family homeobox) Hs.94785 AI049960 60436
2330	G_504705	-0.24163	-0.51667	0.57038		100806 C3orf4 chromosome 3 open reading frame 4 Hs.107393 AA142888 56650
2809	G_135608	-0.54	-0.18333	0.570272		108518 OSBPL10 oxysterol binding protein-like 10 Hs.321622 R31395 114884
3657	G_810089	-0.56726	-0.05	0.569459		117714 Homo sapiens, clone IMAGE:5455669, mRNA, partial cds Hs.67776 AA464963
4177	G_268978	0.23928	0.51667	0.569388		226769 OSBPL8 oxysterol binding protein-like 8 Hs.109694 N26078 114882
4626	G_1457205	-0.32597	-0.46667	0.569243		104164 Homo sapiens cDNA FLJ20525 fis, clone KAT10610 Hs.98491 AA921732
4273	G_1915096	-0.27161	-0.5	0.56901		308355 LILRB4 leukocyte immunoglobulin-like receptor, subfamily B (with TM and ITIM domains), member 4 Hs.67846 AI371323 11006
975	G_726464	-0.23796	-0.51667	0.568835		109549 SPAG9 sperm associated antigen 9 Hs.129872 AA399253 9043
2244	G_30793	-0.34794	-0.45	0.568825		112060 PEX11B peroxisomal biogenesis factor 11B Hs.83023 R18258 8799
2908	G_23282	0.46917	0.32083	0.568377		106905 IK IK cytokine, down-regulator of HLA II Hs.8024 R39227 IK=IFN-gamma antagonist cytokine 3550
1795	G_823665	-0.34695	-0.45	0.56822		315432 PBEF pre-B-cell colony-enhancing factor Hs.239138 AA489629 10135
4580	G_279963	0.30501	0.47917	0.56801		221830 Homo sapiens cDNA FLJ35910 fis, clone TESTI2009987 Hs.348902 N57557
4572	G_1667408	0.47131	0.31667	0.567814		317927 ESTs Hs.262893 AI057562
5015	G_1667317	-0.43327	-0.36667	0.5676		312469 SEL1L sel-1 suppressor of lin-12-like (C. elegans) Hs.181300 AI052118 6400
2561	G_130977	-0.29742	-0.48333	0.567509		112716 Homo sapiens cDNA FLJ13555 fis, clone PLACE1007677 Hs.23437 R22926
3415	G_346257	0.23475	0.51667	0.567499		101484 MCM4 MCM4 minichromosome maintenance deficient 4 (S. cerevisiae) Hs.154443 W74071 4173
3146	G_153646	0.43301	0.36667	0.567402		223310 COL1A1 collagen, type I, alpha 1 Hs.172928 R48843 1277
2145	G_2445606	-0.297	-0.48333	0.567289		330868 NDP52 nuclear domain 10 protein Hs.154230 AI886127 10241
2366	G_49591	-0.1932	-0.53333	0.567245		110165 STS steroid sulfatase (microsomal), arylsulfatase C, isozyme S Hs.79876 H15155 412
4287	G_73720	-0.34534	-0.45	0.567239		110959 T54603
4573	G_1046522	0.43258	0.36667	0.567073		116112 BIRC1 baculoviral IAP repeat-containing 1 Hs.79019 AA621150 4671
585	G_214236	-0.36562	-0.43333	0.566968		161020 CD68 CD68 antigen Hs.246381 H77636 CD68 968
561	G_789012	0.32082	0.46667	0.566309		120182 FBLN2 fibulin 2 Hs.198862 AA452840 2199
808	G_377275	-0.43152	-0.36667	0.566265		107602 TRIM29 tripartite motif-containing 29 Hs.82237 AA055485 ataxia-telangiectasia group D-associated protein (not the re 23650
1395	G_788234	0.52977	0.2	0.566265		112938 ID4 inhibitor of DNA binding 4, dominant negative helix-loop-helix protein Hs.34853 AA452493 3400
4511	G_1455603	-0.43149	-0.36667	0.566242		223855 FLJ12428 hypothetical protein FLJ12428 Hs.87729 AA863125 64798
1776	G_1909774	-0.26537	-0.5	0.566058		320096 ESTs, Weakly similar to hypothetical protein FLJ11267 [Homo sapiens] [H.sapiens] Hs.114624 AI342997
2440	G_53092	-0.3428	-0.45	0.565696		106265 ESTs, Highly similar to A47102 system b(0,+) amino acid transporter-involved protein - human [H.sapiens] Hs.356063 R15785
4335	G_868770	-0.55317	0.11667	0.56534		220105 AA775321
2075	G_343073	-0.39948	-0.4	0.565318		107164 RGS12 regulator of G-protein signalling 12 Hs.78281 W67133 6002
5048	G_379709	-0.34217	-0.45	0.565314		222120 KIAA1497 KIAA1497 protein Hs.126085 AA778089 57633
2422	G_295923	-0.4562	-0.33333	0.565002		120219 BM-002 hypothetical protein BM-002 Hs.367646 N73536 51569
5124	G_969666	-0.51456	-0.23333	0.564991		225184 Homo sapiens, clone IMAGE:3949285, mRNA Hs.293993 AA663614
385	G_51851	-0.31843	-0.46667	0.564959		223550 **ESTs, Weakly similar to I78885 serine/threonine-specific protein kinase (EC 2.7.1.-) STK2 - human [H.sapiens] Hs.6529 H23053
2684	G_738970	-0.39897	-0.4	0.564958		113005 DJ462O23.2 hypothetical protein dJ462O23.2 Hs.13804 AA421769 57185
5047	G_609155	-0.31815	-0.46667	0.564801		109427 FLJ13211 **hypothetical protein FLJ13211 Hs.380170 AA176867 91907
2272	G_263727	-0.38074	-0.41667	0.564426		112371 D5S346 DNA segment, single copy probe LNS-CAI/LNS-CAII (deleted in polyposis Hs.178112 H99681 7905
1572	G_415820	-0.51341	-0.23333	0.563944		113270 TPK1 thiamin pyrophosphokinase 1 Hs.58715 W84814 27010
1069	G_2108002	-0.5134	-0.23333	0.563935		192039 JAK1 Janus kinase 1 (a protein tyrosine kinase) Hs.50651 AI492016 Unknown UG Hs.170908 EST 3716
2685	G_132828	-0.39714	-0.4	0.563667		113590 DSCR1L2 Down syndrome critical region gene 1-like 2 Hs.129319 R26919 11123
3613	G_1636868	-0.561	-0.05	0.563224		224354 HSPC141 HSPC141 protein Hs.297214 AI015589 29085
3242	G_740941	-0.52634	-0.2	0.563058		113954 APM2 adipose specific 2 Hs.74120 AA478298 10974
4853	G_45327	-0.35915	-0.43333	0.562818		101451 ACLY ATP citrate lyase Hs.174140 H08547 47
3176	G_268385	0.53212	-0.18333	0.562816		225978 IFRG28 28kD interferon responsive protein Hs.43388 N23400 64108
3994	G_307069	0.28788	0.48333	0.562568		111760 ALDH3B1 aldehyde dehydrogenase 3 family, member B1 Hs.83155 N93686 221
2928	G_271855	-0.31404	-0.46667	0.562496		101552 MGC4170 MGC4170 protein Hs.7041 N35222 79158
1314	G_295564	-0.22208	-0.51667	0.562377		110533 RAB31 RAB31, member RAS oncogene family Hs.223025 N72559 11031
2771	G_785913	0.51149	0.23333	0.562197		110153 DKFZP564O0423 DKFZP564O0423 protein Hs.5028 AA449490 26011
1054	G_854831	0.51131	0.23333	0.562033		223489 CLIC6 chloride intracellular channel 6 Hs.353146 AA630241 54102
344	G_50562	-0.2867	-0.48333	0.561965		120815 C8orf4 chromosome 8 open reading frame 4 Hs.283683 H16793 56892
2430	G_490805	-0.42551	-0.36667	0.561699		116750 NCOA4 nuclear receptor coactivator 4 Hs.99908 AA133212 8031
4367	G_306919	0.5308	0.18333	0.561568		109121 ESTs Hs.20085 N91961
2442	G_486641	-0.43915	-0.35	0.561563		226727 MOCS2 molybdenum cofactor synthesis 2 Hs.70565 AA043465 4338
3078	G_1035759	0.50269	-0.25	0.561424		226612 TSGA14 testis specific, 14 Hs.27027 AA629116 95681
906	G_298409	-0.2552	-0.5	0.561362		100426 FABP3 fatty acid binding protein 3, muscle and heart (mammary-derived growth inhibitor) Hs.49881 N70502 2170
2899	G_253507	-0.45167	-0.33333	0.561351		100008 Homo sapiens cDNA FLJ25972 fis, clone TST05664 Hs.88162 H89282
443	G_246304	0.54898	0.11667	0.561241		109273 BTG3 BTG family, member 3 Hs.77311 N52496 10950
2689	G_137437	0.54505	0.13333	0.561121		315169 LIFR leukemia inhibitory factor receptor Hs.2798 R38064 3977
306	G_32573	0.56078	0.01667	0.561028		114695 NRXN1 neurexin 1 Hs.22998 R20413 9378
852	G_1439157	0.54048	0.15	0.560909		108465 MS4A8B membrane-spanning 4-domains, subfamily A, member 8B Hs.26638 AA829284 83661
3727	G_770838	0.33472	0.45	0.560836		112519 SLC12A7 solute carrier family 12 (potassium/chloride transporters), member 7 Hs.172613 AA427732 10723
4852	G_151055	-0.25377	-0.5	0.560713		109260 HELO1 homolog of yeast long chain polyunsaturated fatty acid elongation enzyme 2 Hs.250175 H02230 60481
4331	G_121722	0.40823	0.38333	0.559994		109176 FBN2 fibrillin 2 (congenital contractural arachnodactyly) Hs.79432 T98151 2201
2041	G_245099	-0.40801	-0.38333	0.559834		102375 D1S155E NRAS-related gene Hs.69855 N54372 7812
563	G_154472	-0.46156	-0.31667	0.559748		101364 FGFR1 fibroblast growth factor receptor 1 (fms-related tyrosine kinase 2, Pfeiffer syndrome) Hs.748 R54610 FGFR1=Fibroblast growth factor receptor 1 2260
3114	G_1648516	0.55388	-0.07917	0.55951		318344 ESTs Hs.170278 AI055991
1967	G_703384	-0.35392	-0.43333	0.559495		222804 MGC19947 **hypothetical protein MGC19947 Hs.380186 AA258030 203428
1823	G_250095	-0.30839	-0.46667	0.559361		108286 ELK3 ELK3, ETS-domain protein (SRF accessory protein 2) Hs.288555 H97146 2004
4332	G_1745349	-0.53388	-0.16667	0.559291		311147 MYOM2 myomesin (M-protein) 2, 165kDa Hs.79227 AI186799 9172
4693	G_34965	-0.46072	-0.31667	0.559055		311584 POLB polymerase (DNA directed), beta Hs.180107 R19641 5423
83	G_292270	-0.46071	-0.31667	0.559047		107624 FLJ12890 hypothetical protein FLJ12890 Hs.43299 N62475 25904
3444	G_1594172	0.50781	0.23333	0.558851		113698 HSPC150 HSPC150 protein similar to ubiquitin-conjugating enzyme Hs.5199 AA985450 29089
1876	G_308452	-0.35285	-0.43333	0.558818		120066 C20orf77 chromosome 20 open reading frame 77 Hs.27192 N95764 58490
2984	G_1639344	-0.55449	-0.06667	0.558484		309843 ESTs Hs.369095 AI024818
249	G_433231	-0.1656	-0.53333	0.558448		222310 Homo sapiens, LOC158318, clone MGC:42630 IMAGE:4826036, mRNA, complete cds Hs.31240 AA699410
3018	G_138917	0.52737	0.18333	0.558327		109561 ESTs Hs.92137 R62813 L-myc
4318	G_665356	-0.47082	-0.3	0.558275		117342 TNFRSF11B tumor necrosis factor receptor superfamily, member 11b (osteoprotegerin) Hs.81791 AA194983 4982
108	G_743323	-0.30641	-0.46667	0.558272		110825 ESTs Hs.42344 AA400596
1497	G_126458	0.37155	0.41667	0.558268		307281 Homo sapiens, clone MGC:40498 IMAGE:5191481, mRNA, complete cds Hs.188518 R06601
2892	G_488488	-0.35192	-0.43333	0.558232		110439 TXNIP thioredoxin interacting protein Hs.179526 AA044633 brain-expressed HHCPA78 homolog=Induced in HL60 cells treate 10628
3744	G_880730	0.16477	0.53333	0.558203		119970 COX5A **cytochrome c oxidase subunit Va Hs.323834 AA468759 9377
1537	G_771303	0.21091	0.51667	0.55806		112239 SNCG synuclein, gamma (breast cancer-specific protein 1) Hs.349470 AA443638 6623
299	G_68500	0.55404	-0.06667	0.558037		226591 NORE1 NORE1 protein Hs.238730 T53117 83593
1618	G_1470657	-0.45927	-0.31667	0.557861		224685 DIO2 deiodinase, iodothyronine, type II Hs.154424 AA864322 1734
2570	G_183771	-0.28553	-0.47917	0.557791		221421 LOC51633 CGI-77 protein Hs.30532 H44448 51633
2943	G_868484	-0.44707	-0.33333	0.557656		103987 NPC1 Niemann-Pick disease, type C1 Hs.76918 AA634267 4864
1003	G_342181	0.55737	0.01667	0.557619		109848 BCL2 B-cell CLL/lymphoma 2 Hs.79241 W61100 BCL-2 596
130	G_1872813	-0.2776	-0.48333	0.557377		313140 AI264427
2263	G_85171	-0.32883	-0.45	0.557341		115696 ARF4 ADP-ribosylation factor 4 Hs.75290 T71316 378
1403	G_859654	-0.4797	-0.28333	0.557125		224552 ALEX1 ALEX1 protein Hs.9728 AA666418 51309
2569	G_768466	-0.41938	-0.36667	0.55707		101217 RRM2B ribonucleotide reductase M2 B (TP53 inducible) Hs.94262 AA425014 50484
4361	G_1635066	-0.55025	-0.08333	0.556524		308434 PHLDA1 pleckstrin homology-like domain, family A, member 1 Hs.82101 AA995175 22822
4224	G_345247	-0.24369	-0.5	0.556224		117040 ESTs, Moderately similar to vesicle trafficking, beach and anchor containing; cell division cycle 4-like [Homo sapiens] [H.sapiens] Hs.94830 W72369
2770	G_785928	0.48813	0.26667	0.556223		117416 Homo sapiens cDNA FLJ33669 fis, clone BRAMY2028740 Hs.13328 AA448556
2902	G_40881	-0.49685	-0.25	0.556201		114141 FLJ11608 hypothetical protein FLJ11608 Hs.374978 R56055 79608
2301	G_162775	-0.275	-0.48333	0.556087		112677 DDX5 DEAD/H (Asp-Glu-Ala-Asp/His) box polypeptide 5 (RNA helicase, 68kDa) Hs.76053 H27564 1655
3918	G_76605	0.27439	0.48333	0.555786		103698 NESCA nesca protein Hs.226499 T50980 23623
1136	G_704905	-0.43159	-0.35	0.555671		118697 RAP1A RAP1A, member of RAS oncogene family Hs.865 AA279680 Krev-1=RAP-1A 5906
907	G_491559	-0.50619	-0.22917	0.55565		98400 FABP3 fatty acid binding protein 3, muscle and heart (mammary-derived growth inhibitor) Hs.49881 AA148548 2170
4398	G_878836	0.47753	0.28333	0.555257		110839 SGNE1 secretory granule, neuroendocrine protein 1 (7B2 protein) Hs.2265 AA670429 6447
521	G_47428	0.55425	0.03333	0.555251		116308 Homo sapiens cDNA: FLJ21592 fis, clone COL07036 Hs.5921 H11088
400	G_1636836	-0.46693	-0.3	0.554999		311047 GALK1 galactokinase 1 Hs.92357 AI015566 2584
1475	G_810109	-0.50356	-0.23333	0.554991		119395 FLJ21820 hypothetical protein FLJ21820 Hs.63300 AA464979 60526
305	G_29077	0.48672	0.26667	0.554986		104734 KIAA1260 neuroligin Hs.21107 R40983 57502
4033	G_454592	0.2725	0.48333	0.554855		225504 AA677043
2256	G_809422	-0.30003	-0.46667	0.554796		111772 MO25 MO25 protein Hs.6406 AA442950 51719
1487	G_755663	-0.40101	-0.38333	0.554753		109754 RARB retinoic acid receptor, beta Hs.171495 AA419164 RAR-beta-2=Retinoic acid receptor 5915
3535	G_206118	-0.4009	-0.38333	0.554674		103614 ESTs Hs.37916 H61059
4744	G_593929	-0.53398	-0.15	0.554648		117174 FLJ13782 hypothetical protein FLJ13782 Hs.257924 AA169379 79977
546	G_2315876	0.29947	0.46667	0.554494		311776 TPSB1 tryptase beta 1 Hs.347933 AI675311 7177
4730	G_309449	-0.52866	-0.16667	0.554311		310948 RPS4Y ribosomal protein S4, Y-linked Hs.180911 N99061 6192
1437	G_486208	-0.23926	-0.5	0.554297		104753 TGFB3 transforming growth factor, beta 3 Hs.2025 AA040616 7043
683	G_266819	-0.4002	-0.38333	0.554168		223406 DUSP3 dual specificity phosphatase 3 (vaccinia virus phosphatase VH1-related) Hs.181046 N24113 1845
237	G_246661	0.19991	0.51667	0.553996		98869 WSB1 SOCS box-containing WD protein SWiP-1 Hs.187991 N57723 26118
88	G_451646	-0.36488	-0.41667	0.553851		221475 KIAA0924 KIAA0924 protein Hs.190386 AA706892 22834
3455	G_342640	0.39945	0.38333	0.553626		115900 KIAA0101 KIAA0101 gene product Hs.81892 W68219 9768
1324	G_725390	0.54429	0.1	0.5534		311271 GSTP1 glutathione S-transferase pi Hs.226795 AA292063 2950
2332	G_34852	-0.29728	-0.46667	0.553314		116338 BIRC2 baculoviral IAP repeat-containing 2 Hs.289107 R19628 c-IAP1=MIHB=IAP homolog B 329
1444	G_307050	0.14686	0.53333	0.553181		104212 PPARGC1 peroxisome proliferative activated receptor, gamma, coactivator 1 Hs.198468 N89673 10891
4345	G_668685	-0.52734	-0.16667	0.553052		107225 IGFBP1 insulin-like growth factor binding protein 1 Hs.102122 AA233079 3484
4829	G_2018138	-0.45331	-0.31667	0.552965		308574 SCARB2 scavenger receptor class B, member 2 Hs.323567 AI364513 950
4896	G_824665	0.49301	0.25	0.552774		221653 Homo sapiens mRNA; cDNA DKFZp564D016 (from clone DKFZp564D016) Hs.14846 AA482181
4690	G_840606	-0.36287	-0.41667	0.552529		117688 HSD17B4 hydroxysteroid (17-beta) dehydrogenase 4 Hs.75441 AA487914 3295
770	G_726035	-0.29555	-0.46667	0.552386		112735 JUN v-jun sarcoma virus 17 oncogene homolog (avian) Hs.78465 AA293362 3725
3691	G_1031727	-0.52036	-0.18333	0.55171		224918 MRPL41 mitochondrial ribosomal protein L41 Hs.44017 AA609589 64975
1029	G_323028	-0.23318	-0.5	0.5517		107986 MADH3 MAD, mothers against decapentaplegic homolog 3 (Drosophila) Hs.288261 W42414 Smad3=hMAD-3=Homologue of Mothers Against Decapentaplegic (M 4088
635	G_435858	-0.26596	-0.48333	0.551673		108456 RNASE6 ribonuclease, RNase A family, k6 Hs.23262 AA701545 6039
292	G_788185	0.39633	0.38333	0.55138		114707 TNFRSF10B tumor necrosis factor receptor superfamily, member 10b Hs.51233 AA453410 8795
3215	G_346947	-0.41173	-0.36667	0.551333		118939 ZNF211 zinc finger protein 211 Hs.15110 W79316 10520
4696	G_1580874	-0.31844	-0.45	0.551275		220463 CORO2A coronin, actin binding protein, 2A Hs.44396 AA983765 7464
403	G_854338	-0.54888	0.05	0.551153		118716 CHI3L2 chitinase 3-like 2 Hs.154138 AA668821 1117
3547	G_486885	0.3405	0.43333	0.551104		118480 ESTs, Weakly similar to hypothetical protein FLJ20378 [Homo sapiens] [H.sapiens] Hs.380859 AA043091
5056	G_126401	0.03274	0.55	0.550974		105032 ESTs, Weakly similar to T02670 probable thromboxane A2 receptor isoform beta - human [H.sapiens] Hs.269534 R06568
281	G_267464	0.52506	0.16667	0.550878		224917 **Homo sapiens mRNA; cDNA DKFZp586I0521 (from clone DKFZp586I0521) Hs.367803 N25242
2097	G_129644	-0.13729	-0.53333	0.550717		112059 SSH3BP1 spectrin SH3 domain binding protein 1 Hs.24752 R16666 10006
589	G_811139	-0.31725	-0.45	0.550588		114151 HLA-DRB3 major histocompatibility complex, class II, DR beta 3 Hs.308026 AA485739 3125
141	G_1556897	0.54143	0.1	0.550587		308808 NCRMS non-coding RNA in rhabdomyosarcoma (RMS) Hs.119383 AA935956 196475
2133	G_243238	-0.33956	-0.43333	0.550523		109636 YWHAZ tyrosine 3-monooxygenase/tryptophan 5-monooxygenase activation protein, zeta polypeptide Hs.75103 H94670 7534
4561	G_134229	-0.35964	-0.41667	0.550413		99853 Homo sapiens cDNA FLJ12028 fis, clone HEMBB1001850 Hs.24321 R31918
2634	G_1049343	-0.42473	-0.35	0.550359		120031 ESTs Hs.112886 AA620877
2138	G_122077	-0.32255	-0.44583	0.550275		112904 LOC54499 putative membrane protein Hs.93832 T98298 54499
454	G_815588	-0.49012	-0.25	0.550198		307441 KIAA0680 KIAA0680 gene product Hs.102471 AA456845 9749
3003	G_1586270	-0.18888	-0.51667	0.550112		313450 ESTs, Weakly similar to hypothetical protein FLJ20489 [Homo sapiens] [H.sapiens] Hs.136340 AA974181
1491	G_1909163	0.00775	-0.55	0.550055		307226 B3GNT6 UDP-GlcNAc:betaGal beta-1,3-N-acetylglucosaminyltransferase 6 Hs.8526 AI300634 11041
2156	G_31837	-0.31632	-0.45	0.550053		109934 RNF13 ring finger protein 13 Hs.6900 R41965 11342
4854	G_840620	-0.37707	-0.4	0.549711		117838 KIAA0152 KIAA0152 gene product Hs.181418 AA487921 9761
3651	G_502663	0.29033	0.46667	0.549611		225864 ESTs, Weakly similar to T20117 hypothetical protein C50F4.11 - Caenorhabditis elegans [C.elegans] Hs.306165 AA127092
3045	G_135773	-0.33776	-0.43333	0.549415		108073 TERF1 telomeric repeat binding factor (NIMA-interacting) 1 Hs.194562 R33098 7013
4058	G_898010	0.18676	0.51667	0.549388		308748 AA598926
4475	G_194061	0.54294	0.08333	0.549297		111773 CASP8AP2 CASP8 associated protein 2 Hs.122843 H50582 9994
2938	G_809503	0.39324	0.38333	0.549163		101789 ESTs Hs.355702 AA454562
2040	G_813189	-0.26058	-0.48333	0.549099		115935 ESTs, Moderately similar to hypothetical protein FLJ20489 [Homo sapiens] [H.sapiens] Hs.381139 AA456325
5042	G_1467045	-0.40845	-0.36667	0.548888		221587 ESTs Hs.193941 AA883208
3181	G_544502	-0.12939	-0.53333	0.548801		111879 IFIT1 interferon-induced protein with tetratricopeptide repeats 1 Hs.20315 AA074989 3434
1141	G_1946448	-0.48853	-0.25	0.548782		308842 CAV2 caveolin 2 Hs.139851 AI339434 858
5132	G_284882	0.18484	0.51667	0.548738		120132 COL2A1 collagen, type II, alpha 1 (primary osteoarthritis, spondyloepiphyseal dysplasia, congenital) Hs.81343 N66737 1280
3992	G_487988	0.35631	0.41667	0.548243		112971 CORO1A coronin, actin binding protein, 1A Hs.109606 AA047477 coronin-like protein p57=actin binding protein p57 11151
1399	G_277996	-0.2876	-0.46667	0.548174		222959 Homo sapiens mRNA; cDNA DKFZp761K2024 (from clone DKFZp761K2024) Hs.21415 N63445
3367	G_726815	0.33565	0.43333	0.54812		115512 MY038 hypothetical brain protein my038 Hs.356644 AA293888 84712
3386	G_454973	0.50344	0.21667	0.548086		226936 Homo sapiens cDNA FLJ31511 fis, clone NT2RI1000035 Hs.193191 AA676633
2475	G_627105	-0.46896	-0.28333	0.547905		115778 PIGN phosphatidylinositol glycan, class N Hs.108787 AA190634 23556
2989	G_1535980	0.45844	0.3	0.547875		114326 Homo sapiens cDNA FLJ35091 fis, clone PLACE6005786 Hs.126630 AA918057
2962	G_811162	-0.45833	-0.3	0.547783		112254 FMOD fibromodulin Hs.230 AA485748 2331
3585	G_357091	0.31207	0.45	0.54762		112151 HS6ST1 heparan sulfate 6-O-sulfotransferase 1 Hs.6363 W93510 9394
1518	G_795901	0.42115	0.35	0.547601		120477 ESTs, Weakly similar to S26650 DNA-binding protein 5 - human [H.sapiens] Hs.9012 AA460171
253	G_427812	0.18022	0.51667	0.547199		118412 INSR insulin receptor Hs.89695 AA001106 3643
2252	G_299609	-0.33407	-0.43333	0.547154		100870 ZFP26 C3HC4-like zinc finger protein Hs.44685 N70848 50862
1818	G_897983	-0.40602	-0.36667	0.547082		104327 AOP2 anti-oxidant protein 2 (non-selenium glutathione peroxidase, acidic calcium-independent phospholipase A2) Hs.120 AA598874 9588
2247	G_825031	-0.28515	-0.46667	0.546893		223269 LOC51068 CGI-07 protein Hs.181022 AA489210 51068
858	G_296448	0.17899	0.51667	0.546795		107467 IGF2 insulin-like growth factor 2 (somatomedin A) Hs.349109 N74623 Insulin-like growth factor 2 (somatomedin A) 3481
3972	G_33267	0.49447	0.23333	0.546757		248886 Human insulin-like growth factor binding protein 2 (IGFBP2)
2966	G_2253645	-0.41987	-0.35	0.546618		314500 PROL4 proline rich 4 (lacrimal) Hs.45033 AI686409 11272
4668	mitoch_G_1425266	-0.49431	-0.23333	0.546613		433315 *mitoch. cont.
1939	G_23318	-0.31012	-0.45	0.546511		222338 RAB2 RAB2, member RAS oncogene family Hs.78305 R38260 5862
5026	G_43743	0.43303	0.33333	0.546465		118308 CTNND2 catenin (cadherin-associated protein), delta 2 (neural plakophilin-related arm-repeat protein) Hs.80220 H04985 1501
4376	G_753683	0.52546	0.15	0.546451		227055 PCCX2 protein containing CXXC domain 2 Hs.199009 AA406607 84678
1773	G_282935	-0.41907	-0.35	0.546003		220986 GCLC glutamate-cysteine ligase, catalytic subunit Hs.151393 N45129 2729
2454	G_340673	-0.21922	-0.5	0.545946		104636 PRDM2 PR domain containing 2, with ZNF domain Hs.26719 W56271 7799
790	G_1635203	-0.44439	-0.31667	0.545676		307597 Homo sapiens cDNA FLJ36047 fis, clone TESTI2017951 Hs.127824 AI003775
562	G_711857	-0.50064	-0.21667	0.545515		119431 FGFR1 fibroblast growth factor receptor 1 (fms-related tyrosine kinase 2, Pfeiffer syndrome) Hs.748 AA281064 2260
4874	G_788246	-0.38797	-0.38333	0.545401		104556 AA452499
1501	G_245990	0.48371	0.25	0.544496		102953 Homo sapiens, RNA helicase-related protein, clone MGC:32732 IMAGE:4041046, mRNA, complete cds Hs.381097 N55459
4259	G_1956910	-0.35024	-0.41667	0.544318		307547 SDCCAG43 serologically defined colon cancer antigen 43 Hs.132792 AI214154 10812
3453	G_712505	0.48345	0.25	0.544265		161703 CDC2 cell division cycle 2, G1 to S and G2 to M Hs.334562 AA278152 CDC2=Cell division control protein 2 homolog=P34 protein kin 983
1410	G_842946	-0.2782	-0.46667	0.543301		102806 CDC27 cell division cycle 27 Hs.172405 AA489324 996
4946	G_129725	-0.46331	-0.28333	0.543076		100889 ESTs, Highly similar to A47214 Jk-recombination signal binding protein IGKJRB, extended splice form aPCR-2 - human [H.sapiens] Hs.356806 R16902
4826	G_251727	-0.2476	-0.48333	0.54306		226898 ESTs Hs.24723 H97851
2397	G_2323631	-0.36726	-0.4	0.543028		331252 AGM1 N-acetylglucosamine-phosphate mutase Hs.237323 AI682819 26089
1034	G_206052	-0.32708	-0.43333	0.542915		112415 Homo sapiens cDNA FLJ31090 fis, clone IMR321000102 Hs.55098 H60978
1734	G_151240	-0.3479	-0.41667	0.542815		119607 Homo sapiens cDNA FLJ37284 fis, clone BRAMY2013590 Hs.348490 H02525
1761	G_397638	-0.30354	-0.45	0.542804		223082 LSM6 Sm protein F Hs.42438 AA708261 11157
3616	G_1946107	-0.53628	-0.08333	0.542716		319257 FLJ13055 hypothetical protein FLJ13055 Hs.6846 AI341987 64748
992	G_471755	-0.36647	-0.4	0.542494		225446 Homo sapiens cDNA FLJ39789 fis, clone SPLEN2003160 Hs.11924 AA035077
2127	G_144862	-0.30272	-0.45	0.542346		111630 LOC51014 CGI-109 protein Hs.278391 R78569 51014
129	1049033	-0.41422	-0.35	0.54229		99780 CLGN calmegin Hs.86368 AA778675 Calmegin=putative testis-specific chaperon 1047
4251	G_430968	0.3985	0.36667	0.541525		109186 ENPP3 ectonucleotide pyrophosphatase/phosphodiesterase 3 Hs.264750 AA678335 5169
4754	G_2014034	0.27455	0.46667	0.541441		310768 MTHFD2 methylene tetrahydrofolate dehydrogenase (NAD+ dependent), methenyltetrahydrofolate cyclohydrolase Hs.154672 AI361330 10797
3391	G_366057	0.32396	0.43333	0.541041		115337 CDC25A cell division cycle 25A Hs.1634 AA071514 993
4238	G_78294	0.27247	0.46667	0.540389		118120 UGT2B15 UDP glycosyltransferase 2 family, polypeptide B15 Hs.150207 T50788 7366
106	G_878281	-0.39695	-0.36667	0.540385		222958 RPS6KC1 ribosomal protein S6 kinase, 52kDa, polypeptide 1 Hs.30352 AA670286 26750
2167	G_198312	-0.32283	-0.43333	0.540365		117740 TOMM70A translocase of outer mitochondrial membrane 70 homolog A (yeast) Hs.21198 R94191 9868
2924	G_193883	-0.20481	-0.5	0.540321		117413 GMNN geminin, DNA replication inhibitor Hs.234896 H51100 51053
1877	G_122147	-0.27231	-0.46667	0.540309		224702 ELMO2 engulfment and cell motility 2 (ced-12 homolog, C. elegans) Hs.96560 T98503 63916
1944	G_878259	-0.44911	-0.3	0.540092		112754 PRDX1 peroxiredoxin 1 Hs.180909 AA775803 5052
2976	G_594770	-0.2985	-0.45	0.540002		309949 FLJ13593 hypothetical protein FLJ13593 Hs.145807 AA172076 79838
588	G_235903	-0.27164	-0.46667	0.539971		101316 HLA-DRB3 major histocompatibility complex, class II, DR beta 3 Hs.308026 H52245 MHC Class II=DR beta 3125
1890	G_770954	-0.27118	-0.46667	0.53974		103990 **ESTs, Weakly similar to cytokine receptor-like factor 2; cytokine receptor CRL2 precusor [Homo sapiens] [H.sapiens] Hs.355489 AA427980
1878	G_1915867	-0.343	-0.41667	0.539688		319020 FLJ10188 hypothetical protein FLJ10188 Hs.159066 AI311655 55088
1846	G_824933	-0.45923	-0.28333	0.5396		224412 AK3 **adenylate kinase 3 Hs.274691 AA489040 205
4215	G_178999	0.50116	-0.2	0.539594		101100 Homo sapiens cDNA FLJ33996 fis, clone DFNES2008881 Hs.12778 H48165
456	G_324307	0.48622	0.23333	0.539308		109786 BCMP1 brain cell membrane protein 1 Hs.8769 W47640 83604
3217	G_415089	-0.3948	-0.36667	0.538808		106442 NEK2 NIMA (never in mitosis gene a)-related kinase 2 Hs.153704 W93379 4751
2732	G_433350	-0.32009	-0.43333	0.538732		101143 SORD sorbitol dehydrogenase Hs.878 AA700604 6652
2211	G_1659023	-0.44742	-0.3	0.538688		317333 EST Hs.132013 AI040201
2012	G_531886	-0.23711	-0.48333	0.538358		247977 ESTs
1709	G_784238	0.3409	0.41667	0.538356		105227 **Homo sapiens, clone MGC:24463 IMAGE:4082362, mRNA, complete cds Hs.352398 AA446881
2353	G_1880361	-0.26826	-0.46667	0.538279		314987 EST Hs.149961 AI290494
5060	G_366815	0.53771	0.01667	0.537968		99878 Homo sapiens mRNA full length insert cDNA clone EUROIMAGE 1977059 Hs.351928 AA029415
217	G_320455	0.40847	0.35	0.537911		116699 DNAH11 **dynein, axonemal, heavy polypeptide 11 Hs.349084 W04713 8701
2917	G_813286	0.47627	0.25	0.537897		117599 ESTs, Weakly similar to LRP1_HUMAN Low-density lipoprotein receptor-related protein 1 precursor (LRP) (Alpha-2-macroglobulin receptor) (A2MR) (Apolipoprotein E receptor) (APOER) (CD91) [H.sapiens] Hs.236894 AA455934
4049	G_845419	0.1981	0.5	0.537814		118048 FANCA Fanconi anemia, complementation group A Hs.284153 AA644129 2175
[truncated: 3,160 more rows]

## Sheet: AQP
AQP - microarray expression
	1	0	0	0	0	0	0	0	0	0	0	0	0	0	0	0	0	1	0	0	0	0	0	0	0	0	0	0	0	0	0	0	0	0	0	0	0	0	0	0	0	0	0	1	1	1	1	1	1
AQP6	1.614	-0.229	-0.369	-0.565	0.639	-0.576	0.073	0.253	0.148	0.081	-0.272	0.156	-0.205	0.4	0.051	-0.074	-0.148	0.343	0.602	-0.662	-0.498	-0.91	-0.301	-0.698	0.592	0.472	0.115	0.39	0.212	-0.293	-0.244	-0.119	-0.294	-0.314	0.008	-0.701	-0.522	-0.887	-0.022	0.09	-0.277	0.05	-0.093	0.282	0.805	-0.278	0.123	-0.016	0.342
AQP3	-0.478	0.043	0.438	0.899	0.716	1.12	0.166	0.973	0.582	-0.424	-0.245	-0.122	-0.097	-0.386	0.545	0.523	0.282	0.806	0.833	1.162	-0.099	1.114	0.824	0.155	1.277	0.378	0.172	1.22	1.861	0.56	0.221	0.588	0.116	0.939	0.642	1.45	1.215	0.552	0.937	0.783	0.168	0.021	0.239	0.374	1.517	0.225	-0.088	0.705	-0.504
AQP1	0.547	-0.207	0.381	0.966	-0.334	1.223	0.571	0.41	0.241	0.382	0.912	-0.039	0.03	0.02	-0.208	0.086	-0.128	1.511	0.604	1.946	0.58	0.704	0.765	0.333	1.111	-0.501	-0.131	0.731	0.049	0.079	0.342	-0.141	0.273	0.967	-0.005	1.045	0.848	-0.272	0.418	0.181	-0.378	-0.602	0.12	0.742	1.382	0.903	0.275	0.958	1.178
	0.561	-0.131	0.15	0.433333	0.340333	0.589	0.27	0.545333	0.323667	0.013	0.131667	-0.00166667	-0.0906667	0.0113333	0.129333	0.178333	0.002	0.886667	0.679667	0.815333	-0.00566667	0.302667	0.429333	-0.07	0.993333	0.116333	0.052	0.780333	0.707333	0.115333	0.106333	0.109333	0.0316667	0.530667	0.215	0.598	0.513667	-0.202333	0.444333	0.351333	-0.162333	-0.177	0.0886667	0.466	1.23467	0.283333	0.103333	0.549	0.338667
	AQP6	AQP3	AQP1					3+1
0	0.05	0.021	-0.602	-0.2905	0	-0.276	-0.5795	-0.581
0	0.4	-0.386	0.02	-0.183	0	0.21	-0.3275	-0.366
0	-0.277	0.168	-0.378	-0.105	0	-0.3275	-0.276	-0.21	AQP3 and AQP1
0	-0.229	0.043	-0.207	-0.082	0	-0.218	-0.218	-0.164
0	0.156	-0.122	-0.039	-0.0805	0	0.0585	-0.1825	-0.161
0	0.472	0.378	-0.501	-0.0615	0	-0.0145	-0.138	-0.123
0	-0.205	-0.097	0.03	-0.0335	0	-0.0875	-0.13	-0.067
0	0.081	-0.424	0.382	-0.021	0	0.2315	-0.107	-0.042
0	0.115	0.172	-0.131	0.0205	0	-0.008	-0.103	0.041
0	-0.148	0.282	-0.128	0.077	0	-0.138	-0.0875	0.154
0	-0.887	0.552	-0.272	0.14	0	-0.5795	-0.0785	0.28
0	0.051	0.545	-0.208	0.1685	0	-0.0785	-0.0145	0.337
0	-0.093	0.239	0.12	0.1795	0	0.0135	-0.0105	0.359														control
0	0.639	0.716	-0.334	0.191	0	0.1525	-0.008	0.382														tumor
0	-0.294	0.116	0.273	0.1945	0	-0.0105	0.0015	0.389														metastasis
0	-0.119	0.588	-0.141	0.2235	0	-0.13	0.006	0.447
0	-0.498	-0.099	0.58	0.2405	0	0.041	0.006	0.481
0	-0.698	0.155	0.333	0.244	0	-0.1825	0.0135	0.488
0	-0.244	0.221	0.342	0.2815	0	0.049	0.041	0.563
0	-0.074	0.523	0.086	0.3045	0	0.006	0.049	0.609
0	0.008	0.642	-0.005	0.3185	0	0.0015	0.0585	0.637
0	-0.293	0.56	0.079	0.3195	0	-0.107	0.1305	0.639
0	-0.272	-0.245	0.912	0.3335	0	0.32	0.1355	0.667
0	0.073	0.166	0.571	0.3685	0	0.322	0.1525	0.737
0	-0.369	0.438	0.381	0.4095	0	0.006	0.163	0.819
0	0.148	0.582	0.241	0.4115	0	0.1945	0.172	0.823
0	0.09	0.783	0.181	0.482	0	0.1355	0.1945	0.964
0	-0.022	0.937	0.418	0.6775	0	0.198	0.198	1.355
0	0.253	0.973	0.41	0.6915	0	0.3315	0.2005	1.383
0	0.602	0.833	0.604	0.7185	0	0.603	0.21	1.437	AQP3 and AQP1		sorted by average
0	-0.301	0.824	0.765	0.7945	0	0.232	0.2315	1.589
0	-0.91	1.114	0.704	0.909	0	-0.103	0.232	1.818
0	-0.565	0.899	0.966	0.9325	0	0.2005	0.32	1.865
0	-0.314	0.939	0.967	0.953	0	0.3265	0.322	1.906
0	0.212	1.861	0.049	0.955	0	0.1305	0.3235	1.91
0	0.39	1.22	0.731	0.9755	0	0.5605	0.3265	1.951
0	-0.522	1.215	0.848	1.0315	0	0.163	0.3315	2.063
0	-0.576	1.12	1.223	1.1715	0	0.3235	0.5605	2.343
0	0.592	1.277	1.111	1.194	0	0.8515	0.603	2.388
0	-0.701	1.45	1.045	1.2475	0	0.172	0.642	2.495
0	-0.662	1.162	1.946	1.554	0	0.642	0.8515	3.108
1	-0.005	-0.203	-2.206	-1.2045	1	-1.1055	-1.1055	-2.409
1	-1.025	-0.994	-1.184	-1.089	1	-1.1045	-1.1045	-2.178
1	-0.202	-1.265	-0.697	-0.981	1	-0.4495	-1.0195	-1.962
1	0.276	-2.053	0.105	-0.974	1	0.1905	-0.776	-1.948
1	-0.104	-0.859	-1.014	-0.9365	1	-0.559	-0.7295	-1.873
1	0.353	-1.005	-0.864	-0.9345	1	-0.2555	-0.72	-1.869
1	-1.407	-1.677	-0.145	-0.911	1	-0.776	-0.7065	-1.822
1	0.513	-0.294	-1.494	-0.894	1	-0.4905	-0.682	-1.788
1	-0.019	-0.646	-1.089	-0.8675	1	-0.554	-0.6135	-1.735
1	-0.624	-0.314	-1.415	-0.8645	1	-1.0195	-0.559	-1.729
1	-0.147	-0.372	-1.293	-0.8325	1	-0.72	-0.554	-1.665
1	0.073	-1.097	-0.53	-0.8135	1	-0.2285	-0.4905	-1.627
1	0.132	-0.735	-0.875	-0.805	1	-0.3715	-0.485	-1.61
1	0.381	-0.648	-0.853	-0.7505	1	-0.236	-0.4495	-1.501
1	0.212	0.083	-1.439	-0.678	1	-0.6135	-0.4315	-1.356
1	0.19	-0.309	-0.95	-0.6295	1	-0.38	-0.423	-1.259
1	-0.323	-1.013	-0.232	-0.6225	1	-0.2775	-0.4	-1.245
1	-0.11	-0.532	-0.69	-0.611	1	-0.4	-0.38	-1.222
1	-0.35	-0.185	-1.014	-0.5995	1	-0.682	-0.3715	-1.199
1	1.978	-0.22	-0.979	-0.5995	1	0.4995	-0.3705	-1.199
1	-0.506	-1.051	-0.132	-0.5915	1	-0.319	-0.357	-1.183
1	-0.018	-0.346	-0.828	-0.587	1	-0.423	-0.3425	-1.174
1	-0.429	-0.06	-1.03	-0.545	1	-0.7295	-0.319	-1.09
1	0.206	-0.258	-0.821	-0.5395	1	-0.3075	-0.3075	-1.079
1	0.65	0.067	-1.103	-0.518	1	-0.2265	-0.2775	-1.036
1	-0.467	-0.386	-0.274	-0.33	1	-0.3705	-0.2555	-0.66
1	1.235	0.09	-0.701	-0.3055	1	0.267	-0.236	-0.611
1	-0.211	-0.399	-0.166	-0.2825	1	-0.1885	-0.2285	-0.565
1	-0.489	0.009	-0.481	-0.236	1	-0.485	-0.2265	-0.472
1	0.184	-0.339	-0.092	-0.2155	1	0.046	-0.1885	-0.431
1	-1.256	-0.272	-0.157	-0.2145	1	-0.7065	-0.1805	-0.429
1	0.001	-0.283	-0.085	-0.184	1	-0.042	-0.1585	-0.368
1	-0.682	-0.15	-0.181	-0.1655	1	-0.4315	-0.0645	-0.331
1	-0.052	-0.058	-0.265	-0.1615	1	-0.1585	-0.044	-0.323
1	0.2	0.139	-0.329	-0.095	1	-0.0645	-0.042	-0.19
1	0.213	-0.673	0.497	-0.088	1	0.355	0	-0.176
1	0.171	-0.294	0.216	-0.039	1	0.1935	0.046	-0.078
1	-0.543	0.192	-0.142	0.025	1	-0.3425	0.0585	0.05
1	1.614	-0.478	0.547	0.0345	1	1.0805	0.071	0.069
1	0.224	0.157	-0.077	0.04	1	0.0735	0.0735	0.08
1	-0.621	0.185	-0.093	0.046	1	-0.357	0.1835	0.092
1	-0.555	-0.064	0.194	0.065	1	-0.1805	0.1905	0.13
1	-0.407	-0.646	0.824	0.089	1	0.2085	0.1935	0.178
1	0.123	-0.088	0.275	0.0935	1	0.199	0.199	0.187
1	-0.16	-0.053	0.277	0.112	1	0.0585	0.2085	0.224
1	-0.078	0.152	0.078	0.115	1	0	0.2255	0.23
1	0.308	0.017	0.249	0.133	1	0.2785	0.2465	0.266
1	0.501	0.266	0.073	0.1695	1	0.287	0.26	0.339
1	-0.328	0.237	0.24	0.2385	1	-0.044	0.267	0.477
1	-0.026	-0.001	0.519	0.259	1	0.2465	0.2785	0.518
1	-0.114	0.39	0.256	0.323	1	0.071	0.287	0.646
1	0.342	-0.504	1.178	0.337	1	0.76	0.29	0.674
1	0.179	0.465	0.401	0.433	1	0.29	0.3125	0.866
1	0.218	-0.126	1.188	0.531	1	0.703	0.355	1.062
1	0.282	0.374	0.742	0.558	1	0.512	0.471	1.116
1	-0.278	0.225	0.903	0.564	1	0.3125	0.4995	1.128
1	-0.519	0.229	0.97	0.5995	1	0.2255	0.512	1.199
1	-0.668	0.438	1.035	0.7365	1	0.1835	0.703	1.473
1	-0.016	0.705	0.958	0.8315	1	0.471	0.76	1.663
1	-0.052	1.162	0.572	0.867	1	0.26	0.927	1.734
1	0.343	0.806	1.511	1.1585	1	0.927	1.0805	2.317
1	0.805	1.517	1.382	1.4495	1	1.0935	1.0935	2.899
2	0.819	-1.373	-1.358	-1.3655	2	-0.2695	-0.5925	-2.731
2	0.668	-2.091	-0.24	-1.1655	2	0.214	-0.367	-2.331
2	0.51	-3.332	1.134	-1.099	2	0.822	-0.2695	-2.198
2	0.236	-1.381	-0.327	-0.854	2	-0.0455	-0.0455	-1.708
2	0.254	-0.16	-1.439	-0.7995	2	-0.5925	-0.014	-1.599
2	0.836	-0.71	-0.659	-0.6845	2	0.0885	0.0885	-1.369
2	0.322	0.476	-0.35	0.063	2	-0.014	0.214	0.126
2	0.2	-0.227	0.37	0.0715	2	0.285	0.285	0.143
2	-0.3	0.89	-0.434	0.228	2	-0.367	0.822	0.456
[truncated: 63 more columns]

## Sheet: AQP heatmap
AQP3
AQP1
